# Supplementary material for: Is tuna ecolabeling causing fishers more harm than good?
Source: Research Square preprint supplement (doi:10.21203/rs.3.rs-3717953/v2), 2024-03-21
Supplement: Supplementary file 1 [file b8d44472173afa566f45c9eb.xlsx]

## Sheet: MSC Tuna Vessel List
	Supplementary Materials for the manuscript "Is tuna ecolabeling causing fishers more harm than good?", Authour: Katrina Nakamura, PhD
	DATABASE OF TUNA VESSELS IN THE MARINE STEWARDSHIP COUNCIL PROGRAM
	PRIMARY DATA SOURCE: https://fisheries.msc.org
	DATA COLLECTION PERIOD: January-February 2023. Self-declarations about fishing labour were downloaded from https://fisheries.msc.org with a control date of February 2, 2023.
	NOTE TO READER: Where names were not found on the MSC website for the vessel owner or operator of the vessel listed on the certificate (the fishing employer), the vessels were searched on the registry of the RFMO referenced in certification documents to find the names.
	VESSEL NAME ON MSC Certificate	FLAG STATE	OWNER WAS LISTED WITH THE VESSEL	VESSELS WERE ASSOCIATED TO THE SELF-DECLARATION ABOUT FISHING LABOUR	ALL VESSEL FLAGS ARE IDENTIFIED IN THE SELF-DECLARATION	A VESSEL WORKPLACE PRACTICE WAS GIVEN IN THE SELF-DECLARATION	VESSEL OWNERS WERE ASSOCIATED TO THE SELF-DECLARATION	LAB STATEMENT NAMES FISHING EMPLOYERS?	REGISTRATION #
			Where names of owners identified on the MSC vessel list differ from the RFMO registry, then that is noted.	1 = YES	1 = YES	1 = YES	1 = YES	1 = YES
				0 = NO	0 = NO	0 = NO	0 = NO	0 = NO
Certificate #	MSC Certificate F-31399
	SZLC CSFC & FZLC FSM EEZ Longline Yellowfin and Bigeye Tuna	MSC ELIGIBILITY START DATE	MSC ELIGIBILITY END DATE	CLIENT CONTACT:	CERTIFIER CONTACT:
	Liancheng Overseas Fishery (Shenzhen) Co. Ltd (SZLC)	2018-10-05	2024-09-06	Luen Thai Fishing Ventures	Control Union
	China Southern Fishery Shenzhen Co. Ltd (CSFC)			Eric Gilman	fisheriesuk@controlunion.com
	Liancheng Overseas Fishery (FSM) Co. Ltd (FZLC)			ericlgilman@gmail.com
	98 vessels: 89 China, 5 FSM, 4 Chinese Taipei			fisheriesresearchgroup@gmail.com
	Notes: Crew estimated at 1470. 3 vessels not found on WCPFC
	62 vessels operate outside of the MSC Chain of Custody and 36 within it. Those outside are noted in purple.
	4 variations requested
	Vessels:	FLAG STATE	OWNER WAS LISTED WITH THE VESSEL	VESSELS WERE ASSOCIATED TO THE SELF-DECLARATION ABOUT FISHING LABOUR	ALL VESSEL FLAGS ARE IDENTIFIED IN THE SELF-DECLARATION	A VESSEL WORKPLACE PRACTICE WAS GIVEN IN THE SELF-DECLARATION	VESSEL OWNERS WERE ASSOCIATED TO THE SELF-DECLARATION	STATEMENT NAMES FISHING EMPLOYERS?	REGISTRATION #	IRCS
31399	SHEN LIAN CHENG 760	China	SZLC	1	1	1	0	1	(YUE)CHUANDENG(JI)（2016) FT-100051	BZXC32
31399	SHEN LIAN CHENG 761	China	SZLC	1	1	1	0	1	(YUE)CHUANDENG(JI)（2016) FT-100053	BZXC33
31399	SHEN LIAN CHENG 881	China	SZLC	1	1	1	0	1	(YUE)CHUANDENG(JI)（2017) FT-200004	BZXD92
31399	SHEN LIAN CHENG 882	China	SZLC	1	1	1	0	1	(YUE)CHUANDENG(JI)（2017) FT-200005	BZXD93
31399	SHEN LIAN CHENG 883	China	SZLC	1	1	1	0	1	(YUE)CHUANDENG(JI)（2017) FT-200006	BZXD94
31399	SHEN LIAN CHENG 884	China	SZLC	1	1	1	0	1	(YUE)CHUANDENG(JI)（2017) FT-200003	BZXD95
31399	SHEN LIAN CHENG 885	China	SZLC	1	1	1	0	1	(YUE)CHUANDENG(JI)（2017) FT-200002	BZXD96
31399	HUA NAN YU 711	China	CSFC	1	1	1	0	1	(YUE)CHUANDENG(JI)（2016）FT-100050	BZXD22
31399	HUA NAN YU 712	China	CSFC	1	1	1	0	1	(YUE)CHUANDENG(JI)（2016）FT-100048	BZXD23
31399	HUA NAN YU 716	China	CSFC	1	1	1	0	1	(YUE)CHUANDENG(JI)（2016）FT-100034	BZXD24
31399	HUA NAN YU 718	China	CSFC	1	1	1	0	1	(YUE)CHUANDENG(JI)（2016）FT-100032	BZXD26
31399	HUA NAN YU 719	China	CSFC	1	1	1	0	1	(YUE)CHUANDENG(JI)（2016）FT-100030	BZXD27
31399	HUA NAN YU 721	China	CSFC	1	1	1	0	1	(YUE)CHUANDENG(JI)（2016）FT-100031	BZXD28
31399	HUA NAN YU 722	China	CSFC	1	1	1	0	1	(YUE)CHUANDENG(JI)（2016）FT-100029	BZXD29
31399	HUA NAN YU 723	China	CSFC	1	1	1	0	1	(YUE)CHUANDENG(JI)（2016）FT-100028	BZXD32
31399	HUA NAN YU 731	China	CSFC	1	1	1	0	1	(YUE)CHUANDENG(JI)（2017）FT-200084	BZXD33
31399	HUA NAN YU 732	China	CSFC	1	1	1	0	1	(YUE)CHUANDENG(JI)（2017）FT-200085	BZXD34
31399	HUA NAN YU 736	China	CSFC	1	1	1	0	1	(YUE)CHUANDENG(JI)（2017）FT-200086	BZXD35
31399	HUA NAN YU 737	China	CSFC	1	1	1	0	1	(YUE)CHUANDENG(JI)（2017）FT-200087	BZXD36
31399	HUA NAN YU 738	China	CSFC	1	1	1	0	1	(YUE)CHUANDENG(JI)（2017）FT-200088	BZXD37
31399	HUA NAN YU 739	China	CSFC	1	1	1	0	1	(YUE)CHUANDENG(JI)（2017）FT-200089	BZXD38
31399	SHEN GANG FA 15	China	FZLC Listed on WCPFC as Shenzhen Shengang Overseas Industrial Co., Ltd chartered to Liancheng	1	1	1	0	1	(YUE)CHUANDENG(JI)(2018) FT-200033	BZXD52
31399	SHEN GANG FA 16	China	FZLC Listed on WCPFC as Shenzhen Shengang Overseas Industrial Co., Ltd chartered to Liancheng	1	1	1	0	1	(YUE)CHUANDENG(JI)(2018) FT-200034	BZXD53
31399	SHEN GANG FA 17	China	FZLC Listed on WCPFC as Shenzhen Shengang Overseas Industrial Co., Ltd chartered to Liancheng	1	1	1	0	1	(YUE)CHUANDENG(JI)(2018) FT-200035	BZXD54
31399	SHEN GANG FA 18	China	FZLC Listed on WCPFC as Shenzhen Shengang Overseas Industrial Co., Ltd Chartered to Liancheng	1	1	1	0	1	(YUE)CHUANDENG(JI)(2018) FT-200036	BZXD55
31399	SHEN GANG FA 19	China	FZLC Listed on WCPFC as Shenzhen Shengang Overseas Industrial Co., Ltd chartered to Liancheng	1	1	1	0	1	(YUE)CHUANDENG(JI)(2018) FT-200037	BZXD56
31399	SHEN GANG FA 715	China	FZLC Listed on WCPFC as Shenzhen Shengang Overseas Industrial Co., Ltd chartered to Liancheng	1	1	1	0	1	(YUE)CHUANDENG(JI)(2018) FT-200038	BZXD62
31399	SHEN GANG FA 716	China	FZLC Listed on WCPFC as Shenzhen Shengang Overseas Industrial Co., Ltd chartered to Liancheng	1	1	1	0	1	(YUE)CHUANDENG(JI)(2018) FT-200055	BZXD63
31399	SHEN GANG FA 718	China	FZLC Listed on WCPFC as Shenzhen Shengang Overseas Industrial Co., Ltd chartered to Liancheng	1	1	1	0	1	(YUE)CHUANDENG(JI)(2018) FT-200056	BZXD65
31399	SHEN GANG FA 719	China	FZLC Listed on WCPFC as Shenzhen Shengang Overseas Industrial Co., Ltd chartered to Liancheng	1	1	1	0	1	(YUE)CHUANDENG(JI)(2018) FT-200057	BZXD66
31399	SHEN GANG FA 720	China	FZLC Listed on WCPFC as Shenzhen Shengang Overseas Industrial Co., Ltd chartered to Liancheng	1	1	1	0	1	(YUE)CHUANDENG(JI)(2015) FT-200027	BZXD69
31399	CFA22 formerly China flag	FSM	FZLC	1	1	1	0	1	VR0120	V6P22
31399	CFA23	FSM	FZLC	1	1	1	0	1	VR0122	V6P23
31399	CFA25	FSM	FZLC	1	1	1	0	1	VR0121	V6P25
31399	CFA26 formerly Western Pacific 1, Taiwan	FSM	FZLC	1	1	1	0	1	VR0153	V6P26
31399	CFA27 formerly Western Pacific 2, Taiwan	FSM	FZLC	1	1	1	0	1	VR0154	V6P27
31399	SUNSTAR 6	China	FZLC Listed on WCPFC as DALIAN JINGUANG FISHERY CO.,LTD https://www.wcpfc.int/node/17385	1	1	1	0	1	(LIAO)CHUANDENG(JI)(2017)FT200005	BZTH9
31399	SUNSTAR 7	China	FZLC Listed on WCPFC as DALIAN JINGUANG FISHERY CO.,LTD https://www.wcpfc.int/node/17385	1	1	1	0	1	(LIAO)CHUANDENG(JI)(2017)FT200006	BZTY2
31399	SHUN DA 8 Not found on WCPFC, cargo	China	FZLC Not listed on WCPFC	1	1	1	0	1	(LIAO)CHUANDENG(JI)(2016)FT-200021	BZTM7
31399	SHUN DA 9 Not found on WCPFC, fishing vessel	China	FZLC Not listed on WCPFC	1	1	1	0	1	(LIAO)CHUANDENG(JI)(2016)FT-200023	BZTM8
31399	HONG YANG 2	China	FZLC Listed as Rong Cheng chartered to HUANAN FISHERY(COOK ISLANDS)CO.,LTD	1	1	1	0	1	(LU)CHUANDENG(JI)(2016)FT-100017	BBLY1
31399	LU RONG YUAN YU 211	China	FZLC Listed as Rong Cheng chartered to Liancheng FSM, may have some association to Pingtan	1	1	1	0	1	(LU)CHUANDENG(JI)(2016)FT-200164	BCLN8
31399	LU RONG YUAN YU 212	China	FZLC Listed as Rong Cheng chartered to Liancheng FSM, may have some association to Pingtan	1	1	1	0	1	(LU)CHUANDENG(JI)(2017)FT-200038	BBLM6
31399	HONG YANG 8 Different owner and registration number on WCPFC	China	FZLC Listed as Rong Cheng chartered to Liancheng FSM with a different registration number 200099	1	1	1	0	1	(LU)CHUANDENG(JI)(2018)FT-200229	BBIW8
31399	HONG YANG 9 Different owner and reg	China	FZLC Listed as Rong Cheng chartered to Liancheng FSM with a different registration number 200097	1	1	1	0	1	(LU)CHUANDENG(JI)(2016)FT-200046	BBIW9
31399	HONG YANG 88 Different owner and registration number	China	FZLC Listed as Rong Cheng chartered to Liancheng FSM with a different registration number 200098	1	1	1	0	1	(LU)CHUANDENG(JI)(2018)FT-200117	BBIO8
31399	LU RONG YUAN YU 888	China	FZLC Listed as Rong Cheng chartered to Liancheng FSM, may have some association to Pingtan	1	1	1	0	1	(LU)CHUANDENG(JI)(2018)FT-200031	BBIV8
31399	LU RONG YUAN YU 889	China	FZLC Listed as Rong Cheng chartered to Liancheng FSM, may have some association to Pingtan	1	1	1	0	1	(LU)CHUANDENG(JI)(2018)FT-200030	BBIV9
31399	WEN DAR No. 666 Not found on WCPFC, seen 9/22 in East African waters https://www.marinetraffic.com/en/ais/details/ships/shipid:4071304/mmsi:416214900/imo:0/vessel:WEN_DAR_NO_666	Chinese Taipei	FZLC Not found on WCPFC	1	1	0	0	1	CT4-2975	BJ4975
31399	JINXIANG 11	China	FZLC Listed as HUANQIU TUNA FISHING (DALIAN)CO.,LTD chartered to Liancheng	1	1	1	0	1	(LIAO)CHUANDENG(JI)(2014)FT200119	BZYB2
31399	JINXIANG 12	China	FZLC Listed as HUANQIU TUNA FISHING (DALIAN)CO.,LTD chartered to Liancheng	1	1	1	0	1	(LIAO)CHUANDENG(JI)(2015)FT200001	BZYB3
31399	HONGYANG 8	China	FZLC Listed as ZHOUSHAN PACIFIC TUNA PELAGIC FISHERY No Charter under reg (ZHE)ZHOUDENG(JI)(2021)FT-200109	1	1	1	0	1	(ZHE)CHUANDENG(JI)(2018)FT200117	BZU5C
31399	HONGYANG 88	China	FZLC Listed as Zhoushan Pacific No Charter	1	1	1	0	1	(ZHE)CHUANDENG(JI)(2018)FT-200118	BZU6C
31399	CHAOYEUNG No.5	Chinese Taipei	FZLC	1	1	0	0	1	CT4-1600	BJ3600
31399	HWA GWO No.68	Chinese Taipei	FZLC	1	1	0	0	1	CT3-4740	BK6740
31399	HWA GWO No.58	Chinese Taipei	FZLC	1	1	0	0	1	CT4-2220	BJ4220
31399	HUA NAN YU 766	China	CSFC	1	1	1	0	1	(YUE)CHUANDENG(JI)（2016）FT-100056	BZW5C
31399	HUA NAN YU 767	China	CSFC	1	1	1	0	1	(YUE)CHUANDENG(JI)（2016）FT-100057	BZW6C
31399	HUA NAN YU 768	China	CSFC	1	1	1	0	1	(YUE)CHUANDENG(JI)2016) FT-100058	BZW9C
31399	SHEN LIAN CHENG 783	China	SZLC	1	1	1	0	1	(YUE)CHUANDENG(JI) 2018）FT-100012	BZXE2
31399	SHEN LIAN CHENG 784	China	SZLC	1	1	1	0	1	(YUE)CHUANDENG(JI)(2018) FT-100013	BZXE3
31399	SHEN LIAN CHENG 785	China	SZLC	1	1	1	0	1	(YUE)CHUANDENG(JI)(2018) FT-100014	BZXE4
31399	SHEN LIAN CHENG 786	China	SZLC	1	1	1	0	1	(YUE)CHUANDENG(JI)(2018) FT-100016	BZXE5
31399	HAI XING 715	China	FZLC listed as ZHOUSHAN HAIXING OCEAN FISHERIES CO.,LTD chartered to Liancheng	1	1	1	0	1	(ZHE)CHUANDENG(JI)(2017) FT-200065	BZ7VG
31399	HAI XING 716	China	ZHOUSHAN HAIXING OCEAN FISHERIES CO.,LTD chartered to Liancheng	1	1	1	0	1	(ZHE)CHUANDENG(JI)(2017) FT-200067	BZ8VG
31399	HAI XING 717	China	ZHOUSHAN HAIXING OCEAN FISHERIES CO.,LTD chartered to Liancheng	1	1	1	0	1	(ZHE)CHUANDENG(JI)(2017) FT-200066	BZ9VG
31399	HAI XING 718	China	ZHOUSHAN HAIXING OCEAN FISHERIES CO.,LTD chartered to Liancheng	1	1	0	0	1	(ZHE)CHUANDENG(JI)(2017) FT-200068	BZ1VH
31399	HWA GWO NO.6	Chinese Taipei	FZLC	1	1	0	0	1	CT4-2434	BJ4434
31399	SHENG FU JIN	Chinese Taipei	FZLC	1	1	1	0	1	CT4-1986	BJ3986
31399	SHEN LIAN CHENG 781	China	SZLC	1	1	1	0	1	(YUE)CHUANDENG(JI)(2016)FT-100035	BZXV2
31399	SHEN LIAN CHENG 782	China	SZLC	1	1	1	0	1	(YUE)CHUANDENG(JI)(2016)FT-100036	BZXV3
31399	HUA NAN YU 761	China	CSFC	1	1	1	0	1	(YUE) CHUAN DENG (JI) (2016) FT-100054	BZW3C
31399	HUA NAN YU 762	China	CSFC	1	1	1	0	1	(YUE) CHUAN DENG (JI) (2016) FT-100055	BZW4C
31399	HUA NAN YU 769	China	CSFC	1	1	1	0	1	(YUE)CHUANDENG(JI)(2017) FT-100007	BZW1D
31399	HUA NAN YU 702	China	CSFC	1	1	1	0	1	(YUE)CHUANDENG(JI)(2017) FT-100011	BZXW8
31399	SHEN LIAN CHENG 713	China	SZLC	1	1	1	0	1	(YUE)CHUAN DENG(JI) (2016) FT-100042	BZXC18
31399	SLC721	FSM	FZLC	1	1	1	0	1	VR0-129	V6P721
31399	SLC725	FSM	FZLC	1	1	1	0	1	VR0132	V6P725
31399	LU RONG YUAN YU 686	China	FZLC Listed as Rong Cheng chartered no name https://www.wcpfc.int/node/33425	1	1	1	0	1	(LU)CHUANDENG(JI)(2018) FT-200235	BZYP2
31399	JIN XIANG 7	China	FZLC Listed as HUANQIU TUNA FISHING (DALIAN) CO.,LTD chartered to Liancheng	1	1	1	0	1	(LIAO) CHUANDENG (JI) (2018) FT-200011	BZYB7
31399	HUA NAN YU 705	China	CSFC Chartered to MIFV	1	1	1	0	1	(YUESHEN)CHUANDENG(JI)(2019)FT-200011	BZWD9
31399	SHEN LIAN CHENG 787		SZLC Chartered to MIFV	1	1	1	0	1	(YUESHEN)CHUANDENG(JI)(2019)FT-200008	BZXC12
31399	SHEN LIAN CHENG 787	China	SZLC Chartered to MIFV	1	1	1	0	1	(YUESHEN)CHUANDENG(JI)(2019)FT-200008	BZXC12
31399	SHEN LIAN CHENG 788	China		1	1	1	0	1	(YUESHEN)CHUANDENG(JI)(2019)FT-200009	BZXC5
31399	SHEN LIAN CHENG 788	China	SZLC Chartered to MIFV	1	1	1	0	1	(YUESHEN)CHUANDENG(JI)(2019)FT-200009	BZXC5
31399	HUA NAN YU 703	China	CSFC Chartered to MIFV	1	1	1	0	1	(YUE)CHUANDENG(JI)(2017)FT-100010	BZXW9
31399	Clear Water 06	FSM	FZLC	1	1	1	0	1	VR0065	V6P220
31399	MISS LUEN formerly Belize flag	FSM	FZLC	1	1	1	0	1	VR0091	V6P1833
31399	CFA19 formerly FU YUAN YU 903, Belize	FSM	Not found on WCPFC, formerly listed there under FZLC and renamed from Fu Yuan Yu 903 purchased from Pingtan after the vessel was expelled from Indonesia for illegal driftline fishing	1	1	1	0	1	VR0123	V6P006
31399				1	1	1	0	1	CT42527
31399	SHUI HO CHENG NO.6 ALSO operating as ZHEN FENG NO.2 active on VesselFinder, Previously NEPTUNE NO.898;	Chinese Taipei	FZLC Listed as LI, NENG-WEI	1	1	0	0	1	CT42527	BJ4527
31399	SHUI HO CHENG NO.8 Previously ZHEN FENG NO.268; KUO RONG NO.68	Chinese Taipei	FZLC Listed as LI, NENG-TUAN	1	1	0	0	1	CT42993	BJ4993
31399	HWA GWO NO.88 Previously YUH SHENQ TSAIR NO.18	Chinese Taipei	FZLC Listed as HONG, SHAO-ZHOU chartered to Liancheng	1	1	0	0	1	CT4-2336	BJ4336
31399	SHENG CHI HUI NO.2	Chinese Taipei	FZLC Listed as FANG, WU-CHEN	1	1	0	0	1	CT4-2524	BJ4524
31399	SHENG CHI HUI NO.7	Chinese Taipei	FZLC Listed as FANG, SHUI-SHENG chartered to Liancheng	1	1	0	0	1	CT3-4511	BK6511
31399	SHENG CHI HUEI NO.12	Chinese Taipei	FZLC	1	1	0	0	1	CT3-4602	BK6602
31399	SHENG I HSING NO. 22 Previously CHIN YU CHUN	Chinese Taipei	FZLC Listed as HUNG, JUN-HAN	1	1	1	0	1	CT3-5188	BK7188
31399	JINN FWU TSAIR NO.66 Previously YI SHENG CAI	Chinese Taipei	FZLC Listed as TSAI CHEN, GUEI-MEI chartered to Liancheng	1	1	1	0	1	CT4-2785	BJ4785
	MSC Certificate F-30001
	SZLC, CSFC & FZLC Cook Islands EEZ South Pacific albacore, yellowfin and bigeye longline	MSC ELIGIBILITY START DATE	MSC ELIGIBILITY END DATE	CLIENT CONTACT:	CERTIFIER CONTACT:
	Liancheng Overseas Fishery (Shenzhen) Co. Ltd (SZLC)	2015-06-09	2026-02-11	Luen Thai Fishing Venture	Control Union
	China Southern Fishery Shenzhen Co. Ltd (CSFC)			Eric Gilman	fisheriesuk@controlunion.com
	Liancheng Overseas Fishery (FSM) Co. Ltd (FZLC)			ericlgilman@gmail.com
	56 vessels, Estimated 840 crew, 5 vessels not found on WCPFC
	Notes: 5 variation requests. 31 vessels are in the CoC program and 25 are listed as not (in purple).
			Added manually from WCPFC:
30001	HUA NAN YU 711	China	China Southern	0	1	1	0	0	(YUE)CHUANDENG(JI)（2016）FT-100050	BZXD22
30001	HUA NAN YU 712	China	China Southern	0	1	1	0	0	(YUE)CHUANDENG(JI)（2016）FT-100048	BZXD23
30001	HUA NAN YU 716	China	China Southern	0	1	1	0	0	(YUE)CHUANDENG(JI)（2016）FT-100034	BZXD24
30001	HUA NAN YU 717	China	China Southern	0	1	1	0	0	(YUE)CHUANDENG(JI)（2016）FT-100033	BZXD25
30001	HUA NAN YU 718	China	China Southern	0	1	1	0	0	(YUE)CHUANDENG(JI)（2016）FT-100032	BZXD26
30001	HUA NAN YU 719	China	China Southern	0	1	1	0	0	(YUE)CHUANDENG(JI)（2016）FT-100030	BZXD27
30001	HUA NAN YU 721	China	China Southern	0	1	1	0	0	(YUE)CHUANDENG(JI)（2016）FT-100031	BZXD28
30001	HUA NAN YU 722	China	China Southern	0	1	1	0	0	(YUE)CHUANDENG(JI)（2016）FT-100029	BZXD29
30001	HUA NAN YU 723	China	China Southern	0	1	1	0	0	(YUE)CHUANDENG(JI)（2016）FT-100028	BZXD32
30001	HUA NAN YU 731	China	China Southern	0	1	1	0	0	(YUE)CHUANDENG(JI)（2017）FT-200084	BZXD33
30001	HUA NAN YU 732	China	China Southern	0	1	1	0	0	(YUE)CHUANDENG(JI)（2017）FT-200085	BZXD34
30001	HUA NAN YU 736	China	China Southern	0	1	1	0	0	(YUE)CHUANDENG(JI)（2017）FT-200086	BZXD35
30001	HUA NAN YU 737	China	China Southern	0	1	1	0	0	(YUE)CHUANDENG(JI)（2017）FT-200087	BZXD36
30001	HUA NAN YU 738	China	China Southern	0	1	1	0	0	(YUE)CHUANDENG(JI)（2017）FT-200088	BZXD37
30001	HUA NAN YU 739	China	China Southern	0	1	1	0	0	(YUE)CHUANDENG(JI)（2017）FT-200089	BZXD38
30001	SHEN LIAN CHENG 760	China	Liancheng Overseas Fishery (Shenzhen)	0	1	1	0	0	(YUE)CHUANDENG(JI)（2016) FT-100051	BZXC32
30001	SHEN LIAN CHENG 761	China	Liancheng Overseas Fishery (Shenzhen)	0	1	1	0	0	(YUE)CHUANDENG(JI)（2016) FT-100053	BZXC33
30001	SHEN LIAN CHENG 881	China	Liancheng Overseas Fishery (Shenzhen)	0	1	1	0	0	(YUE)CHUANDENG(JI)（2017) FT-200004	BZXD92
30001	SHEN LIAN CHENG 882	China	Liancheng Overseas Fishery (Shenzhen)	0	1	1	0	0	(YUE)CHUANDENG(JI)（2017) FT-200005	BZXD93
30001	SHEN LIAN CHENG 883	China	Liancheng Overseas Fishery (Shenzhen)	0	1	1	0	0	(YUE)CHUANDENG(JI)（2017) FT-200006	BZXD94
30001	SHEN LIAN CHENG 884	China	Liancheng Overseas Fishery (Shenzhen)	0	1	1	0	0	(YUE)CHUANDENG(JI)（2017) FT-200003	BZXD95
30001	SHEN LIAN CHENG 885	China	Liancheng Overseas Fishery (Shenzhen)	0	1	1	0	0	(YUE)CHUANDENG(JI)（2017) FT-200002	BZXD96
30001	SHEN GANG FA 15	China	Shenzhen Shengang Overseas Industrial Co., Ltd chartered to Liancheng	0	1	1	0	0	(YUE)CHUANDENG(JI) (2018) FT-200033	BZXD52
30001	SHEN GANG FA 16	China	Shenzhen Shengang Overseas Industrial Co., Ltd chartered to Liancheng	0	1	1	0	0	(YUE)CHUANDENG(JI) (2018) FT-200034	BZXD53
30001	SHEN GANG FA 17	China	Shenzhen Shengang Overseas Industrial Co., Ltd chartered to Liancheng	0	1	1	0	0	(YUE)CHUANDENG(JI) (2018) FT-200035	BZXD54
30001	SHEN GANG FA 18	China	Shenzhen Shengang Overseas Industrial Co., Ltd chartered to Liancheng	0	1	1	0	0	(YUE)CHUANDENG(JI) (2018) FT-200036	BZXD55
30001	SHEN GANG FA 19	China	Shenzhen Shengang Overseas Industrial Co., Ltd chartered to Liancheng	0	1	1	0	0	(YUE)CHUANDENG(JI) (2018) FT-200037	BZXD56
30001	SHEN GANG FA 715	China	Shenzhen Shengang Overseas Industrial Co., Ltd chartered to Liancheng	0	1	1	0	0	(YUE)CHUANDENG(JI) (2018) FT-200038	BZXD62
30001	SHEN GANG FA 716	China	Shenzhen Shengang Overseas Industrial Co., Ltd chartered to Liancheng	0	1	1	0	0	(YUE)CHUANDENG(JI) (2018) FT-200055	BZXD63
30001	SHEN GANG FA 718	China	Shenzhen Shengang Overseas Industrial Co., Ltd chartered to Liancheng	0	1	1	0	0	(YUE)CHUANDENG(JI) (2018) FT-200056	BZXD65
30001	SHEN GANG FA 719	China	Shenzhen Shengang Overseas Industrial Co., Ltd chartered to Liancheng	0	1	1	0	0	(YUE)CHUANDENG(JI) (2018) FT-200057	BZXD66
30001	SHEN GANG FA 720	China	Shenzhen Shengang Overseas Industrial Co., Ltd chartered to Liancheng	0	1	1	0	0	(YUE)CHUANDENG(JI) (2015) FT-200027	BZXD69
30001	ESTHER	CI	Not listed on WCPFC vessel register	0	1	0	0	0	1090	E5U2018
30001	GRACE	CI	Not listed on WCPFC vessel register	0	1	0	0	0	1293	E5U2209
30001	GRACE 1	CI	C.F Incorporated C/- Cook Islands Trust Corporation Ltd https://www.wcpfc.int/node/16922	0	1	0	0	0	1294	E5U2210
30001	HONG YANG 8	China	Rong Cheng chartered to Liancheng https://www.wcpfc.int/node/17592 under the same call sign but different registration number	0	1	1	0	0	(LU)CHUANDENG(JI) (2018) FT-200229	BBIW8
30001	HONG YANG 88	China	Rong Cheng chartered to Liancheng https://www.wcpfc.int/node/17773 same call sign but different registration number (there is another Hong Yang 88 on the wcpfc registry owned by Zhoushan Pacific https://www.wcpfc.int/node/18218)	0	1	1	0	0	(LU)CHUANDENG(JI) (2018) FT-200117	BBIO8
30001	HONG YANG 9	China	Rong Cheng chartered to Liancheng https://www.wcpfc.int/node/17593 under the same call sign but different registration number	0	1	1	0	0	(LU)CHUANDENG(JI) (2016) FT-200046	BBIW9
30001	LU RONG YUAN YU 888	China	Rong Cheng chartered to Liancheng https://www.wcpfc.int/node/18096 under the same call sign and different registration number	0	1	1	0	0	(LU)CHUAN DENG(JI) (2018) FT-200031	BBIV8
30001	LU RONG YUAN YU 889	China	Rong Cheng chartered to Liancheng https://www.wcpfc.int/node/18097 under the same call sign but different registration number	0	1	1	0	0	(LU)CHUANDENG(JI) (2018) FT-200030	BBIV9
30001	LU RONG YUAN YU 211	China	Rong Cheng chartered to Liancheng https://www.wcpfc.int/node/28662 under the same call sign but different registration number	0	1	1	0	0	(LU)CHUANDENG(JI) (2016) FT-200164	BCLN8
30001	LU RONG YUAN YU 212	China	Rong Cheng chartered to Liancheng https://www.wcpfc.int/node/20421 under the same call sign but different registration number	0	1	1	0	0	(LU)CHUANDENG(JI) (2017) FT-200038	BBLM6
30001	LU RONG YUAN YU 686	China	Rong Cheng chartered no name https://www.wcpfc.int/node/33425 under the same call sign but different registration number	0	1	1	0	0	(LU)CHUANDENG(JI) (2018) FT-200235	BZYP2
30001	HONG YANG 2	China	Rong Cheng chartered to HUANAN FISHERY(COOK ISLANDS)CO.,LTD https://www.wcpfc.int/node/17335	0	1	1	0	0	(LU)CHUANDENG(JI) (2016) FT-100017	BBLY1
30001	VIKING SPIRIT	CI	vessel not found on wcpfc but registered to CI https://www.vesseltracker.com/en/Ships/Viking-Spirit-I1959684.html	0	1	0	0	0	CI 01/02	E5WY
30001	LADY ANN II	CI	vessel not found on wcpfc but registered to CI https://www.marinetraffic.com/en/ais/details/ships/shipid:5435068/mmsi:518100073/imo:0/vessel:LADY_ANN_II	0	1	0	0	0	2118	E5U3018
30001	CFA22 formerly China flag	FSM	Liancheng Overseas Fishery (FSM)	0	1	0	0	0	VR0120	V6P22
30001	HAI XING 715	China	FZLC listed as ZHOUSHAN HAIXING OCEAN FISHERIES CO.,LTD chartered to Liancheng	0	1	1	0	0	(ZHE)CHUANDENG(JI) (2017) FT-200065	BZ7VG
30001	HAI XING 716	China	ZHOUSHAN HAIXING OCEAN FISHERIES CO.,LTD chartered to Liancheng	0	1	1	0	0	(ZHE)CHUANDENG(JI) (2017) FT-200067	BZ8VG
30001	HAI XING 717	China	ZHOUSHAN HAIXING OCEAN FISHERIES CO.,LTD chartered to Liancheng	0	1	1	0	0	(ZHE)CHUANDENG(JI) (2017) FT-200066	BZ9VG
30001	HAI XING 718	China	ZHOUSHAN HAIXING OCEAN FISHERIES CO.,LTD chartered to Liancheng	0	1	1	0	0	(ZHE)CHUANDENG(JI) (2017) FT-200068	BZ1VH
30001	HONG YANG 11	China	ZHOUSHAN HAIXING OCEAN FISHERIES CO.,LTD chartered to Liancheng	0	1	1	0	0	(ZHE)CHUANDENG(JI) (2018) FT-200092	BZU4B
30001	ZHONG YANG 18 NOW RONGHENG 19	China	Renamed and different owner on WCPFC, ZHOUSHAN HAIXING OCEAN FISHERIES CO.,LTD https://www.wcpfc.int/node/17853	0	1	1	0	0	(ZHE)CHUANDENG(JI) (2016) FT-200019	BZXD73
30001	ZHONG YANG 19 NOW RONGHENG 41	China	Not found on WCPFC, ZHOUSHAN HAIXING OCEAN FISHERIES CO.,LTD at https://www.marinetraffic.com/da/ais/details/ships/shipid:7123315/mmsi:412549463/imo:0/vessel:RONG_HENG_41	0	1	1	0	0	(ZHE)CHUANDENG(JI) (2016) FT-200018	BZXD74
30001	ZHONG YANG 28	China	ZHOUSHAN HAIXING OCEAN FISHERIES CO.,LTD chartered to Liancheng https://www.wcpfc.int/node/17854	0	1	1	0	0	(ZHE)CHUANDENG(JI) (2016) FT-200017	BZXD76
30001	HAI XING 815	China	ZHOUSHAN HAIXING OCEAN FISHERIES CO.,LTD chartered to Liancheng https://www.wcpfc.int/node/18120	0	1	1	0	0	(ZHE)CHUANDENG(JI) (2018) FT-200050	BZU6B
30001	HAI XING 817	China	ZHOUSHAN HAIXING OCEAN FISHERIES CO.,LTD chartered to Liancheng https://www.wcpfc.int/node/18122	0	1	1	0	0	(ZHE)CHUANDENG(JI) (2018) FT-200052	BZU8B
	MSC-F-30014
	French Polynesia albacore, yellowfin and swordfish longline fishery	MSC ELIGIBILITY START DATE	MSC ELIGIBILITY END DATE	CLIENT CONTACT:	CERTIFIER CONTACT:
	Direction des Ressources Marines et Minires	2018-06-19	2023-12-18	Direction des Ressources Marines et Minières	Control Union
	85 vessels, Estimated 425 crew, 2 vessels not found on WCPFC			marie.soehnlen@drm.gov.pf	fisheriesuk@controlunion.com
	Notes: 5 variation requests,
	Vessel names were input manually and registration #s are available on the MSC vessel list. No owners listed.
30014	Aorai	French Polynesia	Sarl Tahitian Fisheries	0	1	1	0	0	PY 1327
30014	Ariimoana	French Polynesia	SC VAIANAHOA	0	1	1	0	0	PY 1976
30014	Ariiitai Nui	French Polynesia	SCA MITI MAR	0	1	1	0	0	PY 2083
30014	Ava Iti II	French Polynesia	SCA PACIFIC FISHING INDUSTRY	0	1	1	0	0	PY 2032
30014	Eddy V	French Polynesia	SCP EDDY	0	1	1	0	0	PY 1977
30014	Fai Manu 1	French Polynesia	SC POLY-PECHE	0	1	1	0	0	PY 1988
30014	Fai Manu III	French Polynesia	SCA HOTU RAVA'AI	0	1	1	0	0	PY 2042
30014	Fetu	French Polynesia	SARL FETU ARMEMENT	0	1	1	0	0	PPY 2133
30014	Fetu Mana	French Polynesia	SARL FETU ARMEMENT	0	1	1	0	0	PY 1800
30014	Fetu Tea II	French Polynesia	SARL FETU ARMEMENT	0	1	1	0	0	PPY 1612
30014	Fetu Ura	French Polynesia	SARL FETU ARMEMENT	0	1	1	0	0	PY 2167
30014	Heimana 3	French Polynesia	SCA MATAI MARU gérant CHING Yann	0	1	1	0	0	PY 2085
30014	Santa Raissa	French Polynesia	SCA RAINBOW	0	1	1	0	0	PY 1809
30014	Iraultza	French Polynesia	SCA VAVEA MARU gérant CHING Yann	0	1	1	0	0	PY 1981
30014	Irihonu	French Polynesia	SNC Rava'ai Rau	0	1	1	0	0	PY 1533
30014	Kathe	French Polynesia	SNC RAVA'AI RAU 2	0	1	1	0	0	PY 2129
30014	Kathe II	French Polynesia	SNC RAVA'AI RAU 2	0	1	1	0	0	PY 1516
30014	Kehei	French Polynesia	SCA MOANAFARA	0	1	1	0	0	PY 1271
30014	Keylani	French Polynesia	SCA FARAMOANA	0	1	1	0	0	PY 2084
30014	Khaya Star	French Polynesia	EURL VANA VANA	0	1	1	0	0	PY 2187
30014	Kuki	French Polynesia	SNC DEGAGE ET CIE	0	1	1	0	0	PPY 2648
30014	Lady Chris 3	French Polynesia	SARL ARMEMENT GEORGES MOARII	0	1	1	0	0	PY 2670
30014	Lady Chris 4	French Polynesia	SARL ARMEMENT GEORGES MOARII	0	1	1	0	0	PY 2685
30014	Lady Chris 5	French Polynesia	SARL OCEAN FRESH TAHITI	0	1	1	0	0	PY 1811
30014	Lady Chris 6	French Polynesia	SARL OCEAN FRESH TAHITI	0	1	1	0	0	PY 1806
30014	Lady Chris 7	French Polynesia	SC MOARII AND SONS FISHERIES	0	1	1	0	0	PY 2068
30014	Lady Chris 8	French Polynesia	SC MOARII AND SONS FISHERIES	0	1	1	0	0	PPY 2061
30014	Mairipehe 2	French Polynesia	SNC RAVA'AI RAU 8	0	1	1	0	0	PY 1807
30014	Marybel	French Polynesia	SNC RAVA'AI RAU 4	0	1	1	0	0	PY 2715
30014	Mata'u II	French Polynesia	SCA MATAU	0	1	1	0	0	PY 2725
30014	Meherio XII	French Polynesia	SARL MARO HITI	0	1	1	0	0	PY 1974
30014	Mereana	French Polynesia	SNC RAVA'AI RAU 4	0	1	1	0	0	PY 1970
30014	Mereana 5	French Polynesia	SCA MS PACIFIC LONGLINER	0	1	1	0	0	PY 1980
30014	Mereana 6	French Polynesia	SCA MS PACIFIC LONGLINER	0	1	1	0	0	PY 2189
30014	Mereana 8	French Polynesia	SCA MS PACIFIC LONGLINER 3	0	1	1	0	0	PY 2725
30014	Mereana 9	French Polynesia	SCA MS PACIFIC LONGLINER 2	0	1	1	0	0	PY 1974
30014	Mokai	French Polynesia	SARL MOKAI	0	1	1	0	0	PY 1970
30014	Mokai 2	French Polynesia	SARL MOKAI	0	1	1	0	0	PY 1980
30014	Moorea Rava'ai	French Polynesia	SCA MOOREA PECHE	0	1	1	0	0	PY 1657
30014	Moorea Rava'ai III	French Polynesia	SCA MOOREA PECHE MR3-MR6	0	1	1	0	0	PPY 1592
30014	Moorea Rava'ai IV	French Polynesia	SCA MOOREA PECHE	0	1	1	0	0	PY 2192
30014	Moorea Rava'ai VI	French Polynesia	SCA MOOREA PECHE MR3-MR6	0	1	1	0	0	PY 1728
30014	Moorea Tautai	French Polynesia	SCA KEYALA ARMEMENT	0	1	1	0	0	PY 2188
30014	Nariitea V	French Polynesia	SCA FARAMOANA	0	1	1	0	0	PY 2614
30014	Phoenix	French Polynesia	SCA POISSON DU FENUA	0	1	1	0	0	PY 1515
30014	Pua O Tua	French Polynesia	SCA PUA O TUA	0	1	1	0	0	PY 1812
30014	Puono	French Polynesia	SCP EDDY	0	1	1	0	0	PY 2191
30014	Rava'ai Nui I	French Polynesia	SC TAHITI NUI PECHE	0	1	1	0	0	PY 2223
30014	Rava'ai Nui II	French Polynesia	SC TAHITI NUI PECHE	0	1	1	0	0	PY 2224
30014	Rava'ai Nui III	French Polynesia	SC TAHITI NUI PECHE	0	1	1	0	0	PY 2222
30014	Rava'ai Nui V	French Polynesia	SCA VOLUNTAS DEI	0	1	1	0	0	PY 1620
30014	Riyani	French Polynesia	SCA TE VAI PIHAA	0	1	1	0	0	PY 1405
30014	Tahiti Nui	French Polynesia	SCA TOA RAVA'AI	0	1	1	0	0	PY 2752
30014	Tahitian Tuna	French Polynesia	WILD TAHITIAN TUNA SCA	0	1	1	0	0	PY 2734
30014	Tagni	French Polynesia	SCA TE ARA ROA	0	1	1	0	0	PY 2721
30014	Tagni 3	French Polynesia	SCA VAIANAHOA	0	1	1	0	0	PY 1726
30014	Tamatia	French Polynesia	SCA TOA TAUTAI	0	1	1	0	0	PY 1978
30014	Te Aito	French Polynesia	SC TE AITO RAVA'AI NUI	0	1	1	0	0	PY 2214
30014	Te Aito 2	French Polynesia	SC TE AITO RAVA'AI NUI	0	1	1	0	0	PY 1810
30014	Teiri Iri	French Polynesia	SCA MATAORA	0	1	1	0	0	PY 1598
30014	Temoanarau	French Polynesia	Not found on WCPFC	0	1	1	0	0	PY 1975
30014	Teuki	French Polynesia	WTT SCA	0	1	1	0	0	PY 1808
30014	Tuaanapa	French Polynesia	SC TUAANAPA	0	1	1	0	0	PY 1975
30014	Tuahei	French Polynesia	SCA TUANUI	0	1	1	0	0	PY 1808
30014	Tuahiti	French Polynesia	SCA TUANUI	0	1	1	0	0	PY 2044
30014	Tuahoa	French Polynesia	SCA TUANUI	0	1	1	0	0	PY 2045
30014	Tuahotu	French Polynesia	SCA TUANUI	0	1	1	0	0	PY 2063
30014	Tuamana	French Polynesia	Not found on WCPFC	0	1	1	0	0	PY 2221
30014	Tuamaru	French Polynesia	SCA TUANUI	0	1	1	0	0	PY 2020
30014	Tuamiti	French Polynesia	SCA TUANUI	0	1	1	0	0	PY 2059
30014	Tuarai	French Polynesia	SCA TUANUI	0	1	1	0	0	PY 2062
30014	Tuarani	French Polynesia	SCA TUANUI	0	1	1	0	0	PY 2219
30014	Tuarere	French Polynesia	SCA TUANUI	0	1	1	0	0	PY 2218
30014	Tubuai Ravai'ai III	French Polynesia	SCA TUBUAI RAVA'AI III	0	1	1	0	0	PY 2217
30014	Ulysse One	French Polynesia	ARMEMENT TAHITI TUNA	0	1	1	0	0	PY 2190
30014	Ulysse 2	French Polynesia	ARMEMENT TAHITI TUNA	0	1	1	0	0	PY 2706
30014	Vaeanapa	French Polynesia	SCA VAEANAPA RAVA'AI	0	1	1	0	0	PY 2737
30014	Vaianahoa	French Polynesia	SCA VAIANAHOA	0	1	1	0	0	PY 2252
30014	Vaipahu	French Polynesia	SCA RAVA'AI HERE	0	1	1	0	0	PY 1979
30014	Vaivai Nui	French Polynesia	SCA SAKAPO	0	1	1	0	0	PY 1804
30014	Vini Vini II	French Polynesia	SCA SAKAPO	0	1	1	0	0	PY 1609
30014	Vini Vini IX	French Polynesia	VINI VINI LONG LINE Products (EURL)	0	1	1	0	0	PY 1724
30014	Vini Vini VII	French Polynesia	VINI VINI LONG LINE Products (EURL)	0	1	1	0	0	PPY 2031
30014	Vini Vini X	French Polynesia	SCA FISHING STAR	0	1	1	0	0	PY 2716
30014	Yahei	French Polynesia	SCA FARAMOANA	0	1	1	0	0	PY 1534
	MSC-F-31349
	Fiji Albacore, Yellowfin and Bigeye Tuna longline	MSC ELIGIBILITY START DATE	MSC ELIGIBILITY END DATE	CLIENT CONTACT:	CERTIFIER CONTACT:
	55 vessels	2012-12-13	2023-07-22	Anare Raiwalui Fiji Fishing Industry Association MSC Group	Gillian Irvine, LRQA
	Notes: Estimated 825 crew, 7 vessels not found on WCPFC			raiwalui.anare@gmail.com	fisheries-ca@lrqa.com
	Names and operators were input manually. Vessel registration #s are available on the MSC vessel list pdf. This vessel list was the posted one in Fall 2022 and is dated 2019.
		Had to look up each flag as the vessel list did not state them
31349	Winnful 1	Fiji	Winn Full Fishing Co Ltd	1	1	1	0	0
31349	Winfull 2	Fiji	Winn Full Fishing Co Ltd	1	1	1	0	0
31349	Win Star 1	Fiji	Ocean Harvest Fiji Ltd	1	1	1	0	0
31349	Win Star 2	Fiji	Ocean Harvest Fiji Ltd	1	1	1	0	0
31349	Winnful 6	Fiji	Wistar Fiji Ltd	1	1	1	0	0
31349	Winfull 168	Fiji	Wistar Fiji Ltd	1	1	1	0	0
31349	Yong Xing 1	Fiji	Juls Fiji Ltd	1	1	1	0	0
31349	Yong Xing 2	Fiji	Juls Fiji Ltd	1	1	1	0	0
31349	Yong Xing 3	Fiji	Arianna Ltd	1	1	1	0	0
31349	Zhong Da 2	Fiji	Arianna Ltd	1	1	1	0	0
31349	Zhong Da 3	Fiji	Arianna Ltd	1	1	1	0	0
31349	Zhong Da 5	Fiji	Services Marine Ltd	1	1	1	0	0
31349	Ben 10	Fiji	Services Marine Ltd	1	1	1	0	0
31349	Dae Jin	Fiji	Wistar Fiji Ltd	1	1	1	0	0
31349	Winull 8	Fiji	He Shun Fishing Co Pte Ltd	1	1	1	0	0
31349	He Shun 6	Fiji	He Shun Fishing Co Pte Ltd	1	1	1	0	0
31349	He Shun 38	Fiji	Services Marine Ltd	1	1	1	0	0
31349	Yue Yuan Yu 139	Fiji	Solander Pacific Ltd	1	1	1	0	0
31349	Solander Kariqa	Fiji	Solander Pacific Ltd	1	1	1	0	0
31349	Solander II	Fiji	Solander Pacific Ltd	1	1	1	0	0
31349	Solander III	Fiji	Solander Pacific Ltd	1	1	1	0	0
31349	Solander XV	Fiji	Solander Pacific Ltd	1	1	1	0	0
31349	Solander V	Fiji	Solander Pacific Ltd	1	1	1	0	0
31349	Solander VI	Fiji	Solander Pacific Ltd	1	1	1	0	0
31349	Solander IX	Fiji	Solander Pacific Ltd	1	1	1	0	0
31349	Solander XV	Fiji	Solander Pacific Ltd	1	1	1	0	0
31349	Solander XI	Fiji	Solander Pacific Ltd	1	1	1	0	0
31349	Solander XII	Fiji	Solander Pacific Ltd	1	1	1	0	0
31349	Solander XIV	Fiji	Solander Pacific Ltd	1	1	1	0	0
31349	Lady Ama	Fiji	Cleveland Ltd	1	1	1	0	0
31349	Rabi 1	Not found	Seaquest Fiji Ltd	1	1	1	0	0
31349	Sea Moana	Not found	Seaquest Fiji Ltd	1	1	1	0	0
31349	Sea Malibu	Not found	Seaquest Fiji Ltd	1	1	1	0	0
31349	Sea Beluga	Not found	Seaquest Fiji Ltd	1	1	1	0	0
31349	Seaquences	Not found	Seaquest Fiji Ltd	1	1	1	0	0
31349	Seaka II	Not found	Seaquest Fiji Ltd	1	1	1	0	0
31349	Sam Weon 11	Fiji	Sam Weon Fishery Ltd	1	1	1	0	0
31349	Hangton 9	Fiji	Hangton Pacific Co Ltd	1	1	1	0	0
31349	Hangton 8	Fiji	Hangton Pacific Co Ltd	1	1	1	0	0
31349	Hangton 7	Fiji	Hangton Pacific Co Ltd	1	1	1	0	0
31349	Hangton 3	Fiji	Hangton Pacific Co Ltd	1	1	1	0	0
31349	Hangton 2	Fiji	Hangton Pacific Co Ltd	1	1	1	0	0
31349	Hangton 111	Fiji	Hangton Pacific Co Ltd	1	1	1	0	0
31349	Hangton 112	Fiji	Hangton Pacific Co Ltd	1	1	1	0	0
31349	Hangton 115	Fiji	Hangton Pacific Co Ltd	1	1	1	0	0
31349	Hangton 116	Fiji	Hangton Pacific Co Ltd	1	1	1	0	0
31349	Rising 6	Not found	Sunshine Fisheries Ltd	1	1	1	0	0
31349	Sunshine 6	Fiji	Sunshine Fisheries Ltd	1	1	1	0	0
31349	Sunshine 8	Fiji	Sunshine Fisheries Ltd	1	1	1	0	0
31349	Sunshine 16	Fiji	Sunshine Fisheries Ltd	1	1	1	0	0
31349	Sunshine 18	Fiji	Sunshine Fisheries Ltd	1	1	1	0	0
31349	Sunshine 86	Fiji	Sunshine Fisheries Ltd	1	1	1	0	0
31349	Sunshine 88	Fiji	Sunshine Fisheries Ltd	1	1	1	0	0
31349	Sunshine 89	Fiji	Sunshine Fisheries Ltd	1	1	1	0	0
31349	Zhong Da 6	Fiji	Arianna Ltd	1	1	1	0	0
	MSC-F-31537, 31530, 31556 and 31558
	AGAC four oceans Integral Purse Seine Tropical Tuna Fishery	MSC ELIGIBILITY START DATE	MSC ELIGIBILITY END DATE	CLIENT CONTACT:	CERTIFIER CONTACT:
	AGAC four oceans Integral Purse Seine Tropical Tuna Fishery (WCPO, EPO, AO and IO)	2021-12-08	2027-07-11	Isadora Moniz	LRQA
	60 vessels			fip@opagac.org	Tom Lopes Vieira
	Notes: 2 variation requests, 6 not found with RFMOs				fisheries-ca@lrqa.com
	The vessel lists provide vessel names, IMO#s and flag State. Not owners
	MSC-F-31558
	AGAC four oceans Integral Purse Seine Tropical Tuna Fishery (Atlantic Ocean - AO)
	12 vessels, Estimated 336 crew
	Notes: 3 of 12 nor found on the RFMO registry
31558	Albacora Quince	Spain	Albacora SA Registered on ICCAT, IOTC, WCPFC https://www.wcpfc.int/node/16242	0	1	0	0	0	8206296
31558	Mar de Sergio	Spain	Albacora SA Registered on ICCAT, IOTC, WCPFC, IATTC https://www.wcpfc.int/node/16235; Registered on ICCAT with no owner https://www.iccat.int/es/VesselsRecordDet.asp?id=1880	0	1	0	0	0	8212075
31558	Albacora Caribe	Panama	INTEGRAL FISHING SERVICES Albacora SA Registered on ICCAT https://www.iccat.int/es/VesselsRecordDet.asp?id=2743	0	1	0	0	0	8716825
31558	Cape Coral	Panama	INTEGRAL FISHING SERVICES, INC. Albacora SA Registered on ICCAT https://www.iccat.int/en/VesselsRecordDet.asp?id=36180	0	1	0	0	0	9699050
31558	Galerna Lau	Panama	INTEGRAL FISHING SERVICES, INC. Albacora SA Registered on ICCAT but found it here https://www.vesselfinder.com/vessels/details/9861495	0	1	0	0	0	9861495
31558	Monteraiola	Spain	Cantabrica de Tunidos Registered to ICCAT but found it here https://www.vesselfinder.com/vessels/details/9882009	0	1	0	0	0	9882009
31558	Montemaior	Spain	Cantabrica de Tunidos Registered on IOTC and ICCAT with no owner https://www.iccat.int/en/VesselsRecordDet.asp?id=1878 found it here https://www.vesselfinder.com/vessels/details/7817323	0	1	0	0	0	7817323
31558	Montelape	El Salvador	Calvopesca El Salvador SA Registered on ICCAT and WCPFC found here https://www.wcpfc.int/node/18006	0	1	0	0	0	8021775
31558	Montecelo	El Salvador	OAKCITY TUNA FISHING CORPORATION S.A. DE C.V. Registered to ICCAT https://www.iccat.int/es/VesselsRecordDet.asp?id=3453	0	1	0	0	0	7409152
31558	Montefrisa Nueve	El Salvador	OAKCITY TUNA FISHING CORPORATION S.A. DE C.V. Registered to ICCAT https://www.iccat.int/en/VesselsRecordDet.asp?id=3454	0	1	0	0	0	7409176
31558	Sant Yago Uno	Guatemala	ATUNERA SANT YAGO, S.A. Registered on ICAAT https://www.iccat.int/en/VesselsRecordDet.asp?id=3468	0	1	0	0	0	8919439
31558	Sant Yago Tres	Guatemala	Atunera Nacional https://www.iccat.int/en/VesselsRecordDet.asp?id=18696 Sociedad Registered on ICCAT https://www.iccat.int/en/VesselsRecordDet.asp?id=18696	0	1	0	0	0	8919427
	MSC-F-31537
	AGAC four oceans Integral Purse Seine Tropical Tuna Fishery (Western and Central Pacific Ocean - WCPO)
	16 vessels, Estimated 448 crew
	Notes; 3 of 16 not found named with the fishery authority
31537	Albatun Tres	Spain	Albacora SA	0	1	0	0	0	9281310
31537	Aurora B	Spain	ATUNERA DULARRA, S.	0	1	0	0	0	9156058
31537	Charo	Ecuador	CONSERVAS ISABEL ECUATORIANA S.A No charterer. Vessel is renamed from Tungui, Mexico apprehended by Sea Shepherd but in 1991 https://seashepherd.org/announcement/1991-2/	0	1	0	0	0	8107646
31537	Guayatuna Dos	Ecuador	GUAYATUNA S.A	0	1	0	0	0	8111087
31537	Guayatuna Uno	Ecuador	GUAYATUNA S.A	0	1	0	0	0	8107476
31537	Jane IV	Panama	Not found on WCPFC but vesselfinder says Servicos Atuneros del Norte SA https://www.vesselfinder.com/vessels/details/7915931 and IATTC	0	1	0	0	0	7915931
31537	Jocay	Ecuador	Not found on WCPFC but vesselfinder says Ugavi Pesquera https://www.vesselfinder.com/vessels/details/9710983 However AENOR social certification for AGAC 2017-2019 says CORPORACIÓN ATU-NERA INTERNACIONAL, S.L.	0	1	0	0	0	9710983
31537	Mar de Sergio	Spain	Albacora SA Registered on ICCAT, IOTC, WCPFC, IATTC https://www.wcpfc.int/node/16235; Registered on ICCAT with no owner https://www.iccat.int/es/VesselsRecordDet.asp?id=1880	0	1	0	0	0	8212075
31537	Montelucia	El Salvador	OAKCITY TUNA FISHING CORPORATION S.A de C.V. No charterer	0	1	0	0	0	9232668
31537	Monterocio	El Salvador	Not found on WCPFC but OAKCITY TUNA FISHING CORPORATION S.A de C.V on IATTC but vesselfinder says ALEXANDROS https://www.vesselfinder.com/vessels/details/8919453 while vesseltracking says CALVOPESCA EL SALVADOR SA. https://www.vesseltracking.net/ship/monterocio-8919453 while Aenor says Calvapesca SA	0	1	0	0	0	8919453
31537	Panama Tuna	Ecuador	GUAYATUNA S.A No charterer	0	1	0	0	0	9175028
31537	Rosita C	Spain	ATUNERA DULARRA, S.L No charterer	0	1	0	0	0	9210969
31537	San Andrés	Ecuador	CONSERVAS ISABEL ECUATORIANA S.A No charterer	0	1	0	0	0	8909252
31537	Sisargas	El Salvador	Not found on WCPFC but IATTC vessel list says Uniocean El Salvador, S.A. de C.V. https://www.iattc.org/en-US/Management/Vessel-register	0	1	0	0	0	9698551
31537	Ugavi	Ecuador	Pesquera Ugavi S.A No charterer, formerly IUU black list under name GUADALQUIVIR flagged to Vanuatu (2008) https://meetings.wcpfc.int/node/5849	0	1	0	0	0	7910682
31537	Ugavi Dos	Ecuador	UNIOCEAN S.A. No charterer, formerly named ALBACORA DIECISEIS under Vanuatu	0	1	0	0	0	8206301
	MSC-F-31530
	AGAC four oceans Integral Purse Seine Tropical Tuna Fishery (Eastern Pacific Ocean - EPO)
	19 vessels, Estimated 532 crew
31530	Albatun Tres	Spain	Albacora SA	0	1	0	0	0	9281310
31530	Almirante 1	Panama	Atunera del Istmo, S.A.	0	1	0	0	0	7409164
31530	Aurora B	Spain	ATUNERA DULARRA, S.	0	1	0	0	0	9156058
31530	Charo	Ecuador	Conservas Isabel Ecuatoriana S.A.	0	1	0	0	0	8107646
31530	Guayatuna Dos	Ecuador	GUAYATUNA S.A	0	1	0	0	0	8111087
31530	Guayatuna Uno	Ecuador	Guayatuna, S.A.	0	1	0	0	0	8107476
31530	Jane IV	Panama	Servicios Atuneros Del Norte, S.A.	0	1	0	0	0	7915931
31530	Jocay	Ecuador	Albacora SA Registered on ICCAT, IOTC, WCPFC, IATTC https://www.wcpfc.int/node/16235; Registered on ICCAT with no owner https://www.iccat.int/es/VesselsRecordDet.asp?id=1880	0	1	0	0	0	9710983
31530	Mar de Sergio	Spain	OAKCITY TUNA FISHING CORPORATION S.A de C.V. No charterer	0	1	0	0	0	8212075
31530	Montelucia	El Salvador	Oakcity Tuna Fishing Corporation, S.A. de C.V.	0	1	0	0	0	9232668
31530	Monterocio	El Salvador	Oakcity Tuna Fishing Corporation, S.A. de C.V.	0	1	0	0	0	8919453
31530	Panama Tuna	Ecuador	GUAYATUNA S.A No charterer	0	1	0	0	0	9175028
31530	Rosita C	Spain	ATUNERA DULARRA, S.L No charterer	0	1	0	0	0	9210969
31530	San Andrés	Ecuador	CONSERVAS ISABEL ECUATORIANA S.A No charterer	0	1	0	0	0	8909252
31530	Sisargas	El Salvador	Uniocean El Salvador, S.A. de C.V. https://www.iattc.org/en-US/Management/Vessel-register	0	1	0	0	0	9698551
31530	Txopituna	Panama	Txopituna, S.L.	0	1	0	0	0	8719310
31530	Txopituna Dos	Panama	Txopituna, S.L.	0	1	0	0	0	7805966
31530	Ugavi	Ecuador	Pesquera Ugavi S.A No charterer, formerly IUU black list under name GUADALQUIVIR flagged to Vanuatu (2008) https://meetings.wcpfc.int/node/5849	0	1	0	0	0	7910682
31530	Ugavi Dos	Ecuador	UNIOCEAN S.A. No charterer, formerly named ALBACORA DIECISEIS under Vanuatu	0	1	0	0	0	8206301
	MSC-F-31556
	AGAC four oceans Integral Purse Seine Tropical Tuna Fishery (Eastern Pacific Ocean - IO)
	13 vessels, Estimated 364 crew
31556	Albatun Dos	Spain	Albacora SA Registered IOTC, IATTC, ICCAT, WCPFC	0	1	0	0	0	9281308
31556	Albacora Uno	Spain	Albacora SA	0	1	0	0	0	9127435
31556	Draco	Seychelles	Isabella Fishing Limited	0	1	0	0	0	9335226
31556	Galerna II	Seychelles	Isabella Fishing Limited	0	1	0	0	0	9663154
31556	Galerna III	Seychelles	Isabella Fishing Limited	0	1	0	0	0	9663166
31556	Intertuna Tres	Seychelles	Intertun Limited	0	1	0	0	0	9202704
31556	Txori Zuri	Spain	COMPAÑIA INTERNACIONAL DE PESCA Y DERIVADOS, S.A IUU cited by FTC, 2022 https://financialtransparency.org/wp-content/uploads/2022/10/FTC-fishy-Network-OCT-2022-Final.pdf	0	1	0	0	0	9741085
31556	Itsas Txori	Spain	COMPAÑIA INTERNACIONAL DE PESCA Y DERIVADOS, S.A IUU cited by FTC, 2022 https://financialtransparency.org/wp-content/uploads/2022/10/FTC-fishy-Network-OCT-2022-Final.pdf	0	1	0	0	0	9702869
31556	Txori Gorri	Spain	COMPAÑIA INTERNACIONAL DE PESCA Y DERIVADOS, S.A IUU cited by FTC, 2022 https://financialtransparency.org/wp-content/uploads/2022/10/FTC-fishy-Network-OCT-2022-Final.pdf	0	1	0	0	0	9383156
31556	Txori Argi	Spain	CoMPAÑIA INTERNACIONAL DE PESCA Y DERIVADOS, S.A IUU cited by FTC, 2022 https://financialtransparency.org/wp-content/uploads/2022/10/FTC-fishy-Network-OCT-2022-Final.pdf. Settlement paid to avoid IUU blacklist in 2013 http://www.atuna.com/archive.php?article=13181 also 2012 IUU in Mozambique https://stopillegalfishing.com/news-articles/txori-argi-bank-guarantee-not-honoured-4/	0	1	0	0	0	9286724
31556	Txori Toki	Seychelles	Fishing Indico Limited 2016 IUU sighted and fined in Tanzania EEZ https://core.ac.uk/download/pdf/217238904.pdf	0	1	0	0	0	9196682
31556	Txori Aundi	Seychelles	Fishing Indico Limited	0	1	0	0	0	8208531
31556	Albacora Cuatro	Spain	Albacora SA Registered IOTC, ICCAT, WCPFC	0	1	0	0	0	7325904
	MSC F-31157
	Eastern Pacific Ocean tropical tuna - purse seine (TUNACONS) fishery	MSC ELIGIBILITY START DATE	MSC ELIGIBILITY END DATE	CLIENT CONTACT:	CERTIFIER CONTACT:
	49 vessels, Estimated 1372 crew	2022-07-07	2027-07-06	Tuna Conservation Group (TUNACONS)	SCS Global Services
	Notes: 2 not found with IATTC			www. tunacons.org	mscfisheries@scsglobalservices.com
	Names and operators were input manually. Vessel registration #s are available on the MSC vessel list pdf
31157	Adriana	Ecuador	Eurofish	0	1	1	0	1
31157	Don Igilio	Ecuador	Eurofish	0	1	1	0	1
31157	Alessia	Ecuador	Eurofish	0	1	1	0	1
31157	Alina	Ecuador	Eurofish	0	1	1	0	1
31157	Chiara	Ecuador	Eurofish	0	1	1	0	1
31157	Don Antonio	Ecuador	Eurofish	0	1	1	0	1
31157	Don Bartolo	Ecuador	Eurofish	0	1	1	0	1
31157	Dona Maruja	Ecuador	Eurofish	0	1	1	0	1
31157	Dona Roge	Ecuador	Eurofish	0	1	1	0	1
31157	Giuletta	Ecuador	Eurofish	0	1	1	0	1
31157	Jo Linda	Ecuador	Eurofish	0	1	1	0	1
31157	Miranda	Ecuador	Eurofish	0	1	1	0	1
31157	Rocio	Ecuador	Eurofish	0	1	1	0	1
31157	Drennec	Ecuador	Nirsa	0	1	1	0	1
31157	Elizabeth F.	Ecuador	Nirsa	0	1	1	0	1
31157	Gabriela A.	Ecuador	Nirsa	0	1	1	0	1
31157	Gloria A.	Ecuador	Nirsa	0	1	1	0	1
31157	Milagros A.	Ecuador	Nirsa	0	1	1	0	1
31157	Rafa A.	Ecuador	Nirsa	0	1	1	0	1
31157	Ricky A.	Ecuador	Nirsa	0	1	1	0	1
31157	Roberto A.	Ecuador	Nirsa	0	1	1	0	1
31157	Rosa F.	Ecuador	Nirsa	0	1	1	0	1
31157	Via Simoun	Ecuador	Nirsa	0	1	1	0	1
31157	El Marquez	Panama	Nirsa	0	1	1	0	1
31157	Maria Del Mar A.	Panama	Nirsa	0	1	1	0	1
31157	Milena	Panama	Nirsa	0	1	1	0	1
31157	Claudia L.	Ecuador	Servigrup	0	1	1	0	1
31157	Domenica L.	Ecuador	Servigrup	0	1	1	0	1
31157	Fiorella L	Ecuador	Servigrup	0	1	1	0	1
31157	Malula	Ecuador	Servigrup	0	1	1	0	1
31157	Panchito L.	Ecuador	Servigrup	0	1	1	0	1
31157	Rossana L.	Ecuador	Servigrup	0	1	1	0	1
31157	Yolanda L.	Ecuador	Servigrup	0	1	1	0	1
31157	Diva Maria	Panama	Grupo JADRAN	0	1	1	0	1
31157	Ljubica	Panama	Grupo JADRAN	0	1	1	0	1
31157	Juan Pablo II	Panama	Grupo JADRAN	0	1	1	0	1
31157	Reina De La Paz	Panama	Grupo JADRAN	0	1	1	0	1
31157	Cape Breton	USA	Tri Marine	0	1	1	0	1
31157	Cape Cod	USA	Tri Marine	0	1	1	0	1
31157	Cape Elizabeth III	USA	Tri Marine	0	1	1	0	1
31157	Cape Ferrat	USA	Tri Marine	0	1	1	0	1
31157	Cape Finisterre	USA	Tri Marine	0	1	1	0	1
31157	Cape May	USA	Tri Marine	0	1	1	0	1
31157	Cape Blanco (California coastal)	USA	Tri Marine	0	1	1	0	1
31157	Ferrigno Boy (California Coastal)	USA	Tri Marine	0	1	1	0	1
31157	Barbara H (California coastal)	USA	Tri Marine	0	1	1	0	1
	MSC-F-31440
	MIFV RMI EEZ Longline Yellowfin and Bigeye Tuna	MSC ELIGIBILITY START DATE	MSC ELIGIBILITY END DATE	CLIENT CONTACT:	CERTIFIER CONTACT:
	41 vessels, Estimated 615 crew	7th October 2019	6th April 2025	Marshall Islands Fishing Venture (MIFV)	Control Union
31440	Shen Lian Cheng 707	CHINA	SZLC	1	1	1	0	1	(YUE)CHUANDENG(JI)(2016)FT-100046	34943
31440	Shen Lian Cheng 708	CHINA	SZLC	1	1	1	0	1	(YUE)CHUANDENG)(JI)(2016)FT-100047	34944
31440	Shen Lian Cheng 710	CHINA	SZLC	1	1	1	0	1	(YUE)CHUANDENG(JI)(2016)FT-100040	35516
31440	Shen Lian Cheng 711	CHINA	SZLC	1	1	1	0	1	(YUE)CHUANDENG(JI)(2016)FT-100041	35513
31440	Shen Lian Cheng 712	CHINA	SZLC	1	1	1	0	1	(YUE)CHUANDENG(JI)(2016)FT-100027	35515
31440	Shen Lian Cheng 713	CHINA	SZLC	1	1	1	0	1	(YUE)CHUANDENG(JI)(2016)FT-100042	35514
31440	Shen Lian Cheng 719	CHINA	SZLC	1	1	1	0	1	(YUE)CHUANDENG(JI)(2016)FT-100026	35251
31440	Shen Lian Cheng 720	CHINA	SZLC	1	1	1	0	1	(YUE)CHUANDENG(JI)(2016)FT-100025	35250
31440	Shen Lian Cheng 735	CHINA	SZLC	1	1	1	0	1	(YUE)CHUANDENG(JI)(2017)FT-100004	34242
31440	Shen Lian Cheng 736	CHINA	SZLC	1	1	1	0	1	(YUE)CHUANDENG(JI)(2017)FT-100005	34243
31440	Shen Lian Cheng 737	CHINA	SZLC	1	1	1	0	1	(YUE)CHUANDENG(JI)(2016)FT-100024	33773
31440	Shen Lian Cheng 738	CHINA	SZLC	1	1	1	0	1	(YUE)CHUANDENG(JI)(2016)FT-100023	33774
31440	Shen Lian Cheng 739	CHINA	SZLC	1	1	1	0	1	(YUE)CHUANDENG(JI)(2016)FT-100022	33775
31440	HUA NAN YU 761	CHINA	CSFC	1	1	1	0	1	(YUE)CHUANDENG(JI)(2016)FT-100054	36753
31440	HUA NAN YU 762	CHINA	CSFC	1	1	1	0	1	(YUE)CHUANDENG(JI)(2016)FT-100055	36754
31440	HUA NAN YU 766	CHINA	CSFC	1	1	1	0	1	(YUE)CHUANDENG(JI)(2016) FT-100056	36755
31440	HUA NAN YU 767	CHINA	CSFC	1	1	1	0	1	(YUE)CHUANDENG(JI)(2016)FT-100057	36756
31440	HUA NAN YU 768	CHINA	CSFC	1	1	1	0	1	(YUE)CHUANDENG(JI)(2016)FT-100058	36757
31440	HUA NAN YU 769	CHINA	CSFC	1	1	1	0	1	(YUE)CHUANDENG(JI)(2017)FT-100007	36758
31440	HUA NAN YU 702	CHINA	CSFC	1	1	1	0	1	(YUE)CHUANDENG(JI)(2017)FT-100011	36778
31440	HUA NAN YU 703	CHINA	CSFC	1	1	1	0	1	(YUE)CHUANDENG(JI)(2017)FT-100010	36779
31440	Shen Lian Cheng 781	CHINA	SZLC	1	1	1	0	1	(YUE)CHUANDENG(JI)(2016)FT-100035	36769
31440	Shen Lian Cheng 782	CHINA	SZLC	1	1	1	0	1	(YUE)CHUANDENG(JI)(2016)FT-100036	36770
31440	Shen Lian Cheng 783	CHINA	SZLC	1	1	1	0	1	(YUE)CHUANDENG(JI)(2018)FT-100012	36839
31440	Shen Lian Cheng 784	CHINA	SZLC	1	1	1	0	1	(YUE)CHUANDENG(JI)(2018)FT-100013	36860
31440	Shen Lian Cheng 785	CHINA	SZLC	1	1	1	0	1	(YUE)CHUANDENG(JI)(2018)FT-100014	36863
31440	Shen Lian Cheng 786	CHINA	SZLC	1	1	1	0	1	(YUE)CHUANDENG(JI)(2018)FT-100016	36861
31440	Clear water 03	FSM	FZLC	1	1	1	0	1	VR0063	34976
31440	Clear water 05	FSM	FZLC	1	1	1	0	1	VR0064	34949
31440	Clear water 06	FSM	FZLC	1	1	1	0	1	VR0065	34950
31440	Missluen	FSM	FZLC	1	1	1	0	1	VR0091	35110
31440	CFA 17 (former FU YUAN YU 90 Belize)	FSM	FZLC	1	1	1	0	1	VR0126	34274
31440	CFA18 (Former FU YUAN YU 902 Belize)	FSM	FZLC	1	1	1	0	1	VR0127	34275
31440	CFA19 (former FU YUAN YU 903 Belize)	FSM	FZLC	1	1	1	0	1	VR0123	34425
31440	CFA20 (former FU YUAN YU 904 China)	FSM	FZLC	1	1	1	0	1	VR0124	34426
31440	SLC721	FSM	FZLC	1	1	1	0	1	VR0129	35638
31440	SLC722	FSM	FZLC	1	1	1	0	1	VR0130	35639
31440	SLC723	FSM	FZLC	1	1	1	0	1	VR0131	35640
31440	SLC725	FSM	FZLC	1	1	1	0	1	VR0132	35641
31440	HUA NAN YU 705	CHINA	CSFC	1	1	1	0	1	(YUESHEN)CHUANDENG(JI)(2019)FT-200011	36927
31440	SHEN LIAN CHENG 787	CHINA	SZLC	1	1	1	0	1	(YUESHEN)CHUANDENG(JI)(2019)FT-200008	36928
31440	SHEN LIAN CHENG 788	CHINA	SZLC	1	1	1	0	1	(YUESHEN)CHUANDENG(JI)(2019)FT-200009	36861
	MSC F-31452
	Solomon Islands longline albacore and yellowfin tuna fishery	MSC ELIGIBILITY START DATE	MSC ELIGIBILITY END DATE	CLIENT CONTACT:	CERTIFIER CONTACT:
	33 vessels, Estimated 924 crew	2019-11-28	2025-05-28	Tri Marine International (PTE) LTD	SCS
	Notes: 7 vessels not found on WCPFC registry				mscfisheries@scsglobalservices.com
	Vessel names were copied manually from MSC documents. Unnamed owners and operators.
31452	Shuenn Shing 66 *Former name* Now JIN JINN YI NO.668 on WCPFC vessel registry	Taiwan	TSAI, CHENG HUNG chartered to National Fisheries Developments Ltd	0	1	0	0	1
31452	Yi Siang 6	Taiwan	TSENG, CHIN-HUA chartered to National Fisheries Developments Ltd	0	1	0	0	1
31452	Yi Siang 8	Taiwan	CHEN, MING-CHE chartered to National Fisheries Developments Ltd	0	1	0	0	1
31452	Yi Siang 1	Taiwan	CHI, YU-YUN chartered to National Fisheries Developments Ltd	0	1	0	0	1
31452	Jin Chin 1	Taiwan	LAI, PEI-CHUN charterered to National Fisheries Developments Ltd	0	1	0	0	1
31452	Gui Yuan Yu 60002	China	SHENZHEN SZAP OVERSEAS FISHERIES CO.,LTD No charterer but National says they are the employer in the labor statements	0	1	0	0	1
31452	Gui Yuan Yu 60003	China	SHENZHEN SZAP OVERSEAS FISHERIES CO.,LTD No charterer but National says they are the employer in the labor statements	0	1	0	0	1
31452	Lu Rong Yuan Yu 799	China	Rongcheng Ocean Fishery chartered to National Fisheries Development	0	1	0	0	1
31452	Gui Yuan Yu 60005	China	SHENZHEN SZAP OVERSEAS FISHERIES CO.,LTD No charterer but National says they are the employer in the labor statements	0	1	0	0	1
31452	Gui Yuan Yu 60006	China	SHENZHEN SZAP OVERSEAS FISHERIES CO.,LTD No charterer but National says they are the employer in the labor statements	0	1	0	0	1
31452	Xinya 10	China	SHENZHEN SZAP OVERSEAS FISHERIES CO.,LTD No charterer but National says they are the employer in the labor statements	0	1	0	0	1
31452	Xinya 11	China	SHENZHEN SZAP OVERSEAS FISHERIES CO.,LTD Chartered to National Fisheries Development Ltd	0	1	0	0	1
31452	Rising 8	Fiji	Rising Fisheries Pte Ltd No charterer	0	1	0	0	1
31452	Rising 16	Fiji	Rising Fisheries Pte Ltd No charterer	0	1	0	0	1
31452	Rising 18	Fiji	Rising Fisheries Pte Ltd No charterer	0	1	0	0	1
31452	Rising 28	Fiji	Rising Fisheries Pte Ltd No charterer	0	1	0	0	1
31452	Yu Shun 2	Taiwan	LEE, YU-TUNG No charterer	0	1	0	0	1
31452	Yu Shun 66	Taiwan	WANG, CHUAN-CHENG No charterer formerly named KUO RONG NO.6	0	1	0	0	1
31452	San Sheng Shiang 668	Taiwan	Not found on WCPFC but was in 2015	0	1	0	0	1
31452	Yu Shun 168	Taiwan	Not found on WCPFC; passenger ship on Fleet Mon https://www.fleetmon.com/vessels/yu-shun-no-168_0_11420452/	0	1	0	0	1
31452	Jhan Hong Cai	Taiwan	LU, YU-LIN No charterer, formerly named Maan Cgang Giin	0	1	0	0	1
31452	Hong Rong Not found on WCPFC but could be Hong Long	Taiwan	Not found on WCPFC but could be Hong Long No charterer, formerly named HUNG SHENG NO.88,YONG FA NO.268, https://www.wcpfc.int/node/15138	0	1	0	0	1
31452	E Sun 888	Taiwan	Not found on WCPFC but could be Jin Hong Chen owned by JIN HONG CHENG FISHERY CO., LTD No charterer and formerly named KUO RONG; E SUN NO.888 https://www.wcpfc.int/node/17406	0	1	0	0	1
31452	E Sun 999	Taiwan	Not found on WCPFC but could be JIN HSIANG WANG owned by JIN HSIANG FA FISHERY CO., LTD No charterer and formerly named DE SHENG FA NO.26; E SUN NO.999	0	1	0	0	1
31452	Fu Yu 8	Taiwan	LEE, WU-YU No charterer formerly named YI SHENG WANG NO.1	0	1	0	0	1
31452	Kuo Rong 8	Taiwan	Not found on WCPFC	0	1	0	0	1
31452	Yu Shun 8	Taiwan	HSU, YU-CHING No charterer formerly named DE SHENG FA NO.3	0	1	0	0	1
31452	Yu Shun 88	Taiwan	Not found on WCPFC	0	1	0	0	1
31452	Yu Shun 668	Taiwan	FANG, CHUN-WEI No charterer formerly named HAI CHIEN HSING NO.19	0	1	0	0	1
31452	Yu Shun 888	Taiwan	Not found on WCPFC	0	1	0	0	1
31452	Fu Bon 66	Taiwan	Not found on WCPFC but could be Jin Fu Fong owned by WANG, WEN-HUI No charterer formerly named KUO RONG NO.168; FU BON NO.66	0	1	0	0	1
31452	Yu Shun	Taiwan	HUNG, CHAO-TIEN No charterer	0	1	0	0	1
31452	Fu Bon 99	Taiwan	Not found on WCPFC but could be Jin Shun Cai owned by HSIEH, KUAN-YING No charterer formerly named KUO RONG NO.88; FU BON NO.99	0	1	0	0	1
	MSC-F-31471
	The Maluku Indonesian Handline Yellowfin Tuna Fishery	MSC ELIGIBILITY START DATE	MSC ELIGIBILITY END DATE	CLIENT CONTACT:	CERTIFIER CONTACT:
	9 vessels, Estimated 270 crew	2020-05-12	2025-11-11	Anova Fisheries	SCS
	Notes: Instead of naming vessels the certificate says that the list names the fisher associations and number of fishers. Lisela Inda is Beautiful Leisela, for example.				mscfisheries@scsglobalservices.com
31471	Labuang Barat	Indonesia	Labuang Barat	0	1	1	0	1
31471	Tagalisa Tuna	Indonesia	Tagalisa Tuna	0	1	1	0	1
31471	Latamiha	Indonesia	Latamiha	0	1	1	0	1
31471	Waeplabung	Indonesia	Waeplabung	0	1	1	0	1
31471	Leisela Indah	Indonesia	Leisela Indah	0	1	1	0	1
31471	Setia Selalu	Indonesia	Setia Selalu	0	1	1	0	1
31471	Ayat Jaya	Indonesia	Ayat Jaya	0	1	1	0	1
31471	Wamrugut	Indonesia	Wamrugut	0	1	1	0	1
	MSC F-31527
	Philippine Small-Scale Yellowfin Tuna (Thunnus albacares) Handline Fishery	MSC ELIGIBILITY START DATE	MSC ELIGIBILITY END DATE	CLIENT CONTACT:	CERTIFIER CONTACT:
	580 Vessels, Estimated 11,600 crew	2021-10-19	2026-10-18	Kabang Kalikasan ng Pilipinas Foundation Client Foundation, Inc. (KKPFI)	SCS
	Notes: 69 vessels listed as NO NAME, none of the owners named, no labor certificate			Adrian Gil Cruz	mscfisheries@scsglobalservices.com
	WWF sponsored			phtunahandline@gmail.com
31527	Alysa Mae 2	Philippines		0	0	0	0	0	RL-176	OMFTFA-0001
31527	Dodong	Philippines		0	0	0	0	0	RL-111	OMFTFA-0002
31527	Jhay Boy 1	Philippines		0	0	0	0	0	RL-057	OMFTFA-0003
31527	John Martin	Philippines		0	0	0	0	0	RL-138	OMFTFA-0004
31527	Sam Milby	Philippines		0	0	0	0	0	RL-136	OMFTFA-0005
31527	Dendon	Philippines		0	0	0	0	0	RL-091	OMFTFA-0006
31527	Aira	Philippines		0	0	0	0	0	RL-140	OMFTFA-0007
31527	Yanang	Philippines		0	0	0	0	0	RL-172	OMFTFA-0008
31527	Christian	Philippines		0	0	0	0	0	RL-173	OMFTFA-0009
31527	Yuri	Philippines		0	0	0	0	0	RL-123	OMFTFA-0010
31527	Adrian	Philippines		0	0	0	0	0	RL-052	OMFTFA-0011
31527	Double AA	Philippines		0	0	0	0	0	RL-0127	OMFTFA-0012
31527	Erton	Philippines		0	0	0	0	0	RL-122	OMFTFA-0013
31527	Justin Lieco	Philippines		0	0	0	0	0	RL-060	OMFTFA-0014
31527	Jieyarn	Philippines		0	0	0	0	0	RL-048	OMFTFA-0015
31527	Kiana Jellea	Philippines		0	0	0	0	0	RL-049	OMFTFA-0016
31527	Queen 6	Philippines		0	0	0	0	0	RL-067	OMFTFA-0017
31527	Queen 5	Philippines		0	0	0	0	0	RL-066	OMFTFA-0018
31527	Queen 7	Philippines		0	0	0	0	0	RL-068	OMFTFA-0019
31527	Shuqiline	Philippines		0	0	0	0	0	RL-047	OMFTFA-0020
31527	Christine	Philippines		0	0	0	0	0	RL-043	OMFTFA-0021
31527	3R2	Philippines		0	0	0	0	0	RL-143	OMFTFA-0022
31527	Neil Mar	Philippines		0	0	0	0	0	RL-084	OMFTFA-0023
31527	Nicole	Philippines		0	0	0	0	0	RL-130	OMFTFA-0024
31527	2 Brothers	Philippines		0	0	0	0	0	RL-088	OMFTFA-0025
31527	JM	Philippines		0	0	0	0	0	RL-090	OMFTFA-0026
31527	Angie	Philippines		0	0	0	0	0	RL-065	OMFTFA-0027
31527	Angie Rose	Philippines		0	0	0	0	0	RL-064	OMFTFA-0028
31527	Gemar	Philippines		0	0	0	0	0	RL-062	OMFTFA-0029
31527	Marge	Philippines		0	0	0	0	0	RL-061	OMFTFA-0030
31527	Bon Bon	Philippines		0	0	0	0	0	RL-063	OMFTFA-0031
31527	Jha-Jha	Philippines		0	0	0	0	0	RL-015	OMFTFA-0032
31527	Diofel	Philippines		0	0	0	0	0	RL-097	OMFTFA-0033
31527	Jomelyn 1	Philippines		0	0	0	0	0	RL-012	OMFTFA-0034
31527	Jomelyn 2	Philippines		0	0	0	0	0	RL-013	OMFTFA-0035
31527	Jorsos	Philippines		0	0	0	0	0	RL-170	OMFTFA-0036
31527	Mhec-Mhec	Philippines		0	0	0	0	0	RL-001	OMFTFA-0037
31527	Dan Dan	Philippines		0	0	0	0	0	RL-104	OMFTFA-0038
31527	Karding	Philippines		0	0	0	0	0	RL-101	OMFTFA-0039
31527	Justine 2	Philippines		0	0	0	0	0	RL-175	OMFTFA-0040
31527	Five R	Philippines		0	0	0	0	0	RL-146	OMFTFA-0041
31527	Rubtier 2	Philippines		0	0	0	0	0	RL-164	OMFTFA-0042
31527	Budwiser	Philippines		0	0	0	0	0	RL-162	OMFTFA-0043
31527	Jhay Boy 2	Philippines		0	0	0	0	0	RL-058	OMFTFA-0044
31527	Jette Angelo	Philippines		0	0	0	0	0	RL-050	OMFTFA-0045
31527	Rubie	Philippines		0	0	0	0	0	RL-051	OMFTFA-0046
31527	E John Crister	Philippines		0	0	0	0	0	RL-151	OMFTFA-0047
31527	Julia	Philippines		0	0	0	0	0	RL-100	OMFTFA-0048
31527	Princess Ariane	Philippines		0	0	0	0	0	RL-035	OMFTFA-0049
31527	Nicole	Philippines		0	0	0	0	0	RL-053	OMFTFA-0050
31527	Big Bhoy	Philippines		0	0	0	0	0	RL-103	OMFTFA-0051
31527	Princess Ganda	Philippines		0	0	0	0	0	RL-102	OMFTFA-0052
31527	Edrick Mae	Philippines		0	0	0	0	0	RL-125	OMFTFA-0053
31527	Rigine	Philippines		0	0	0	0	0	RL-059	OMFTFA-0054
31527	Jag Lits	Philippines		0	0	0	0	0	RL-073	OMFTFA-0055
31527	Andrea Yvone	Philippines		0	0	0	0	0	RL-165	OMFTFA-0056
31527	Andrenel	Philippines		0	0	0	0	0	RL-077	OMFTFA-0057
31527	John-Son	Philippines		0	0	0	0	0	RL-112	OMFTFA-0058
31527	Zian Lei	Philippines		0	0	0	0	0	RL-021	OMFTFA-0059
31527	Lester	Philippines		0	0	0	0	0	RL-131	OMFTFA-0060
31527	Jovelyn	Philippines		0	0	0	0	0	RL-152	OMFTFA-0061
31527	Gwen	Philippines		0	0	0	0	0	RL-113	OMFTFA-0062
31527	Raymart	Philippines		0	0	0	0	0	RL-128	OMFTFA-0063
31527	Queen Lei Anne	Philippines		0	0	0	0	0	RL-074	OMFTFA-0064
31527	Jonash	Philippines		0	0	0	0	0	RL-038	OMFTFA-0065
31527	Kambal	Philippines		0	0	0	0	0	RL-037	OMFTFA-0066
31527	Cris Jhay	Philippines		0	0	0	0	0	RL-165	OMFTFA-0067
31527	Jay & Joy	Philippines		0	0	0	0	0	RL-055	OMFTFA-0068
31527	Three Brothers	Philippines		0	0	0	0	0	RL-040	OMFTFA-0069
31527	Gian Miel	Philippines		0	0	0	0	0	RL-042	OMFTFA-0070
31527	GM3	Philippines		0	0	0	0	0	RL-078	OMFTFA-0071
31527	Crystal	Philippines		0	0	0	0	0	RL-072	OMFTFA-0072
31527	Trina	Philippines		0	0	0	0	0	RL-039	OMFTFA-0073
31527	John Kenneth	Philippines		0	0	0	0	0	RL-075	OMFTFA-0074
31527	Sophia	Philippines		0	0	0	0	0	RL-022	OMFTFA-0075
31527	Allan K	Philippines		0	0	0	0	0	RL-032	OMFTFA-0076
31527	Jhonny	Philippines		0	0	0	0	0	RL-041	OMFTFA-0077
31527	Jeann Joy	Philippines		0	0	0	0	0	RL-139	OMFTFA-0078
31527	Bunso	Philippines		0	0	0	0	0	RL-116	OMFTFA-0079
31527	3 DJ	Philippines		0	0	0	0	0	RL-079	OMFTFA-0080
31527	Three Kids	Philippines		0	0	0	0	0	RL-080	OMFTFA-0081
31527	3 Kids	Philippines		0	0	0	0	0	RL-009	OMFTFA-0082
31527	Oragon	Philippines		0	0	0	0	0	RL-010	OMFTFA-0083
31527	Princess Carla 1	Philippines		0	0	0	0	0	RL-105	OMFTFA-0084
31527	Princess Carla 2	Philippines		0	0	0	0	0	RL-106	OMFTFA-0085
31527	Princess Carla 3	Philippines		0	0	0	0	0	RL-107	OMFTFA-0086
31527	Princess Carla 5	Philippines		0	0	0	0	0	RL-109	OMFTFA-0087
31527	Princess Carla 4	Philippines		0	0	0	0	0	RL-108	OMFTFA-0088
31527	Joshin 2	Philippines		0	0	0	0	0	RL-024	OMFTFA-0089
31527	Joshin 1	Philippines		0	0	0	0	0	RL-023	OMFTFA-0090
31527	Solo Sister	Philippines		0	0	0	0	0	RL-016	OMFTFA-0091
31527	Solo Sister 4	Philippines		0	0	0	0	0	RL-018	OMFTFA-0092
31527	Solo Sister 3	Philippines		0	0	0	0	0	RL-017	OMFTFA-0093
31527	Rezelyn 2	Philippines		0	0	0	0	0	RL-169	OMFTFA-0094
31527	Yenel	Philippines		0	0	0	0	0	RL-029	OMFTFA-0095
31527	Perlita 3	Philippines		0	0	0	0	0	RL-026	OMFTFA-0096
31527	Perlita 1	Philippines		0	0	0	0	0	RL-025	OMFTFA-0097
31527	Ley Juris Ava	Philippines		0	0	0	0	0	RL-133	OMFTFA-0098
31527	Two Brothers	Philippines		0	0	0	0	0	RL-004	OMFTFA-0099
31527	Angel 2	Philippines		0	0	0	0	0	RL-193	OMFTFA-0100
31527	Rey John	Philippines		0	0	0	0	0	RL-191	OMFTFA-0101
31527	Eriel	Philippines		0	0	0	0	0	RL-179	OMFTFA-0102
31527	Ronlie Mae	Philippines		0	0	0	0	0	RL-176	OMFTFA-0103
31527	Ken-Ken	Philippines		0	0	0	0	0	RL-188	OMFTFA-0104
31527	Dhanica	Philippines		0	0	0	0	0	RL-187	OMFTFA-0105
31527	John Rey	Philippines		0	0	0	0	0	RL-180	OMFTFA-0106
31527	Tristar 4	Philippines		0	0	0	0	0	SBY-2020-103	OMFTFA-0107
31527	Xian Lee	Philippines		0	0	0	0	0	SBY-2020-219	OMFTFA-0108
31527	Jerlyn 11	Philippines		0	0	0	0	0	SBY-2020-204	OMFTFA-0109
31527	Jerlyn 12	Philippines		0	0	0	0	0	SBY-2020-200	OMFTFA-0110
31527	King Xian 5	Philippines		0	0	0	0	0	SBY-2020-203	OMFTFA-0111
31527	Bianca Janine 6	Philippines		0	0	0	0	0	SBY-2020-199	OMFTFA-0112
31527	Bianca Janine 10	Philippines		0	0	0	0	0	SBY-2020-201	OMFTFA-0113
31527	Bianca Janine 7	Philippines		0	0	0	0	0	SBY-2020-202	OMFTFA-0114
31527	Bianca Janine 3	Philippines		0	0	0	0	0	SBY-2020-198	OMFTFA-0115
31527	C-Jay 1	Philippines		0	0	0	0	0	SBY-2020-062	OMFTFA-0116
31527	Chris John Yan 1	Philippines		0	0	0	0	0	SBY-2020-130	OMFTFA-0117
31527	Chris John Yan 2	Philippines		0	0	0	0	0	SBY-2020-129	OMFTFA-0118
31527	John Vincent	Philippines		0	0	0	0	0	SBY-2020-223	OMFTFA-0119
31527	May Ann	Philippines		0	0	0	0	0	SBY-2020-180	OMFTFA-0120
31527	Jociel 2	Philippines		0	0	0	0	0	SBY-2020-229	OMFTFA-0121
31527	Jociel 4	Philippines		0	0	0	0	0	SBY-2020-235	OMFTFA-0122
31527	Aya	Philippines		0	0	0	0	0	SBY-2020-248	OMFTFA-0123
31527	R.A	Philippines		0	0	0	0	0	SBY-2020-249	OMFTFA-0124
31527	Zaddison Lexus	Philippines		0	0	0	0	0	SBY-2020-264	OMFTFA-0125
31527	E-Jay	Philippines		0	0	0	0	0	SBY-2020-244	OMFTFA-0126
31527	Evelyn	Philippines		0	0	0	0	0	SBY-2020-169	OMFTFA-0127
31527	King	Philippines		0	0	0	0	0	SBY-2020-088	OMFTFA-0128
31527	Fish Keeper	Philippines		0	0	0	0	0	SBY-2020-089	OMFTFA-0129
31527	Ebay Nagasat	Philippines		0	0	0	0	0	SBY-2020-090	OMFTFA-0130
31527	King Gabriel	Philippines		0	0	0	0	0	SBY-2020-091	OMFTFA-0131
31527	God's Will	Philippines		0	0	0	0	0	SBY-2020-063	OMFTFA-0132
31527	GJM 1	Philippines		0	0	0	0	0	SBY-2020-226	OMFTFA-0133
31527	GJM 2	Philippines		0	0	0	0	0	SBY-2020-227	OMFTFA-0134
31527	Elisha	Philippines		0	0	0	0	0	SBY-2020-093	OMFTFA-0135
31527	Gil Angelo	Philippines		0	0	0	0	0	SBY-2020-063	OMFTFA-0136
31527	Reymark	Philippines		0	0	0	0	0	SBY-2020-175	OMFTFA-0137
31527	John Leian	Philippines		0	0	0	0	0	SBY-2020-061	OMFTFA-0138
31527	John Leian 2	Philippines		0	0	0	0	0	SBY-2020-060	OMFTFA-0139
31527	Renmar	Philippines		0	0	0	0	0	SBY-2020-177	OMFTFA-0140
31527	John Paul	Philippines		0	0	0	0	0	SBY-2020-106	OMFTFA-0141
31527	Say-Say	Philippines		0	0	0	0	0	SBY-2020-251	OMFTFA-0142
31527	Biyaya 1	Philippines		0	0	0	0	0	SBY-2020-254	OMFTFA-0143
31527	Biyaya 2	Philippines		0	0	0	0	0	SBY-2020-256	OMFTFA-0144
31527	Biyaya 3	Philippines		0	0	0	0	0	SBY-2020-257	OMFTFA-0145
31527	Biyaya 4	Philippines		0	0	0	0	0	SBY-2020-258	OMFTFA-0146
31527	Biyaya 5	Philippines		0	0	0	0	0	SBY-2020-259	OMFTFA-0147
31527	J.A 1	Philippines		0	0	0	0	0	SBY-2020-007	OMFTFA-0148
31527	J.A 2	Philippines		0	0	0	0	0	SBY-2020-008	OMFTFA-0149
31527	J.A 3	Philippines		0	0	0	0	0	SBY-2020-009	OMFTFA-0150
31527	Jeboy 5	Philippines		0	0	0	0	0	SBY-2020-010	OMFTFA-0151
31527	Jeboy 7	Philippines		0	0	0	0	0	SBY-2020-011	OMFTFA-0152
31527	Solo Brother	Philippines		0	0	0	0	0	SBY-2020-179	OMFTFA-0153
31527	Oy-oy	Philippines		0	0	0	0	0	SBY-2020-233	OMFTFA-0154
31527	Zhel Jake 1	Philippines		0	0	0	0	0	SBY-2020-094	OMFTFA-0155
31527	Zhel Jake 2	Philippines		0	0	0	0	0	SBY-2020-095	OMFTFA-0156
31527	Zhel Jake 3	Philippines		0	0	0	0	0	SBY-2020-096	OMFTFA-0157
31527	Easytrip	Philippines		0	0	0	0	0	SBY-2020-231	OMFTFA-0158
31527	John Lloyd	Philippines		0	0	0	0	0	SBY-2020-0107	OMFTFA-0159
31527	Princess Lara 2	Philippines		0	0	0	0	0	SBY-2020-006	OMFTFA-0160
31527	Princess Lara 1	Philippines		0	0	0	0	0	SBY-2020-005	OMFTFA-0161
31527	Rosalyn	Philippines		0	0	0	0	0	SBY-2020-136	OMFTFA-0162
31527	Relax Lang	Philippines		0	0	0	0	0	SBY-2020-250	OMFTFA-0163
31527	King Jhonas	Philippines		0	0	0	0	0	SBY-2020-092	OMFTFA-0164
31527	Triple M 2	Philippines		0	0	0	0	0	SBY-2020-038	OMFTFA-0165
31527	Triple M 4	Philippines		0	0	0	0	0	SBY-2020-039	OMFTFA-0166
31527	Triple M 5	Philippines		0	0	0	0	0	SBY-2020-040	OMFTFA-0167
31527	Triple M 7	Philippines		0	0	0	0	0	SBY-2020-041	OMFTFA-0168
31527	Triple M 8	Philippines		0	0	0	0	0	SBY-2020-042	OMFTFA-0169
31527	Triple M 10	Philippines		0	0	0	0	0	SBY-2020-043	OMFTFA-0170
31527	Triple M 11	Philippines		0	0	0	0	0	SBY-2020-044	OMFTFA-0171
31527	Triple M 12	Philippines		0	0	0	0	0	SBY-2020-045	OMFTFA-0172
31527	Triple M 15	Philippines		0	0	0	0	0	SBY-2020-046	OMFTFA-0173
31527	Triple M 17	Philippines		0	0	0	0	0	SBY-2020-047	OMFTFA-0174
31527	Triple M 18	Philippines		0	0	0	0	0	SBY-2020-048	OMFTFA-0175
31527	Chris	Philippines		0	0	0	0	0	SBY-2020-176	OMFTFA-0176
31527	Mark Paul	Philippines		0	0	0	0	0	SBY-2020-236	OMFTFA-0177
31527	Rodelyn	Philippines		0	0	0	0	0	SBY-2020-252	OMFTFA-0178
31527	Safeguard	Philippines		0	0	0	0	0	SBY-2020-197	OMFTFA-0179
31527	Biyaya	Philippines		0	0	0	0	0	SBY-2020-0109	OMFTFA-0180
31527	Navigator 6	Philippines		0	0	0	0	0	SBY-2020-0110	OMFTFA-0181
31527	Gift of God	Philippines		0	0	0	0	0	SBY-2020-222	OMFTFA-0182
31527	God's Grace	Philippines		0	0	0	0	0	SBY-2020-212	OMFTFA-0183
31527	Marah	Philippines		0	0	0	0	0	SBY-2020-174	OMFTFA-0184
31527	Divine Mercy 1	Philippines		0	0	0	0	0	SBY-2020-029	OMFTFA-0185
31527	Boy Mariel 1	Philippines		0	0	0	0	0	SBY-2020-068	OMFTFA-0186
31527	Boy Mariel 2	Philippines		0	0	0	0	0	SBY-2020-069	OMFTFA-0187
31527	Gerabuenas 5	Philippines		0	0	0	0	0	SBY-2020-192	OMFTFA-0188
31527	Ninos 4	Philippines		0	0	0	0	0	SBY-2020-193	OMFTFA-0189
31527	Gerabuenas 4	Philippines		0	0	0	0	0	SBY-2020-191	OMFTFA-0190
31527	Gerabuenas 7	Philippines		0	0	0	0	0	SBY-2020-195	OMFTFA-0191
31527	Ninay 6	Philippines		0	0	0	0	0	SBY-2020-194	OMFTFA-0192
31527	Gerabuenas 1	Philippines		0	0	0	0	0	SBY-2020-189	OMFTFA-0193
31527	Gerabuenas 2	Philippines		0	0	0	0	0	SBY-2020-190	OMFTFA-0194
31527	Princess Yasha	Philippines		0	0	0	0	0	SBY-2020-105	OMFTFA-0195
31527	Jenelle	Philippines		0	0	0	0	0	SBY-2020-239	OMFTFA-0196
31527	Dapny	Philippines		0	0	0	0	0	SBY-2020-084	OMFTFA-0197
31527	Edcelle	Philippines		0	0	0	0	0	SBY-2020-213	OMFTFA-0198
31527	J-Mer	Philippines		0	0	0	0	0	SBY-2020-234	OMFTFA-0199
31527	Jean	Philippines		0	0	0	0	0	SBY-2020-173	OMFTFA-0200
31527	Kobe Rej	Philippines		0	0	0	0	0	SBY-2020-056	OMFTFA-0201
31527	Khimberly	Philippines		0	0	0	0	0	SBY-2020-240	OMFTFA-0202
31527	Redine	Philippines		0	0	0	0	0	SBY-2020-058	OMFTFA-0203
31527	Straight Flash	Philippines		0	0	0	0	0	SBY-2020-221	OMFTFA-0204
31527	Princess Rhea 1	Philippines		0	0	0	0	0	SBY-2020-14	OMFTFA-0205
31527	Princess Rhea 2	Philippines		0	0	0	0	0	SBY-2020-15	OMFTFA-0206
31527	Arn Joe 1	Philippines		0	0	0	0	0	SBY-2020-146	OMFTFA-0207
31527	Arn Joe 2	Philippines		0	0	0	0	0	SBY-2020-147	OMFTFA-0208
31527	Arn Joe 3	Philippines		0	0	0	0	0	SBY-2020-148	OMFTFA-0209
31527	Arn Joe 4	Philippines		0	0	0	0	0	SBY-2020-149	OMFTFA-0210
31527	Arn Joe 5	Philippines		0	0	0	0	0	SBY-2020-150	OMFTFA-0211
31527	Arn Joe 6	Philippines		0	0	0	0	0	SBY-2020-151	OMFTFA-0212
31527	Arn Joe 7	Philippines		0	0	0	0	0	SBY-2020-152	OMFTFA-0213
31527	Arn Joe 8	Philippines		0	0	0	0	0	SBY-2020-153	OMFTFA-0214
31527	Arn Joe 9	Philippines		0	0	0	0	0	SBY-2020-154	OMFTFA-0215
31527	Arn Joe 10	Philippines		0	0	0	0	0	SBY-2020-155	OMFTFA-0216
31527	Arn Joe 11	Philippines		0	0	0	0	0	SBY-2020-156	OMFTFA-0217
31527	Arn Joe 12	Philippines		0	0	0	0	0	SBY-2020-157	OMFTFA-0218
31527	Arn Joe 13	Philippines		0	0	0	0	0	SBY-2020-158	OMFTFA-0219
31527	Arn Joe 14	Philippines		0	0	0	0	0	SBY-2020-159	OMFTFA-0220
31527	Arn Joe 15	Philippines		0	0	0	0	0	SBY-2020-160	OMFTFA-0221
31527	Arn Joe 16	Philippines		0	0	0	0	0	SBY-2020-161	OMFTFA-0222
31527	Arn Joe 17	Philippines		0	0	0	0	0	SBY-2020-162	OMFTFA-0223
31527	Arn Joe 18	Philippines		0	0	0	0	0	SBY-2020-163	OMFTFA-0224
31527	Nicole 2	Philippines		0	0	0	0	0	SBY-2020-0113	OMFTFA-0225
31527	Nicole 4	Philippines		0	0	0	0	0	SBY-2020-0114	OMFTFA-0226
31527	Nicole 5	Philippines		0	0	0	0	0	SBY-2020-0115	OMFTFA-0227
31527	Nicole 6	Philippines		0	0	0	0	0	SBY-2020-0116	OMFTFA-0228
31527	Nicole 7	Philippines		0	0	0	0	0	SBY-2020-0117	OMFTFA-0229
31527	Nicole 1	Philippines		0	0	0	0	0	SBY-2020-0112	OMFTFA-0230
31527	Princess Jobelle	Philippines		0	0	0	0	0	2020-0069	OMFTFA-0231
31527	Marish Ashley Kate 1	Philippines		0	0	0	0	0	2020-0027	OMFTFA-0232
31527	M/BCA "LADY JAZZ"	Philippines		0	0	0	0	0	2020-0002	OMFTFA-0233
31527	M/BCA "ANGEL KYLE II"	Philippines		0	0	0	0	0	2020-0004	OMFTFA-0234
31527	M/BCA "AMARA"	Philippines		0	0	0	0	0	2020-0001	OMFTFA-0235
31527	M/BCA "ANGEL I"	Philippines		0	0	0	0	0	2020-0003	OMFTFA-0236
31527	KAMBAL	Philippines		0	0	0	0	0	2020-0005	OMFTFA-0237
31527	Angels of God	Philippines		0	0	0	0	0	2020-0001	OMFTFA-0238
31527	Queen Melissa	Philippines		0	0	0	0	0	2020-0111	OMFTFA-0239
31527	EJ	Philippines		0	0	0	0	0	2020-0020	OMFTFA-0240
31527	Erich Jane	Philippines		0	0	0	0	0	2020-0021	OMFTFA-0241
31527	Jaylhen Rose	Philippines		0	0	0	0	0	2020-0098	OMFTFA-0242
31527	M/BCA "QUADRO KING"	Philippines		0	0	0	0	0	2020-0014	OMFTFA-0243
31527	M/BCA "SEA QUEEN"	Philippines		0	0	0	0	0	2020-0015	OMFTFA-0244
31527	M/BCA "STARLITE"	Philippines		0	0	0	0	0	2020-0016	OMFTFA-0245
31527	Prince Jericho	Philippines		0	0	0	0	0	2020-0101	OMFTFA-0246
31527	Ren-Ren	Philippines		0	0	0	0	0	2020-0124	OMFTFA-0247
31527	LADY RHEINCEL	Philippines		0	0	0	0	0	2020-0048	OMFTFA-0248
31527	Rich Amber	Philippines		0	0	0	0	0	2020-0049	OMFTFA-0249
31527	Rhianna Queen	Philippines		0	0	0	0	0	2020-0122	OMFTFA-0250
31527	Christ Jane	Philippines		0	0	0	0	0	2020-0031	OMFTFA-0251
31527	Crissa Jane	Philippines		0	0	0	0	0	2020-0032	OMFTFA-0252
31527	Christian	Philippines		0	0	0	0	0	2020-0030	OMFTFA-0253
31527	Spoiled Denzel	Philippines		0	0	0	0	0	2020-0062	OMFTFA-0254
31527	Princess Weng	Philippines		0	0	0	0	0	2020-0050	OMFTFA-0255
31527	Patricio Miguel	Philippines		0	0	0	0	0	2020-0051	OMFTFA-0256
31527	Rich & Pearl	Philippines		0	0	0	0	0	2020-0095	OMFTFA-0257
31527	Revie Jean	Philippines		0	0	0	0	0	2020-0089	OMFTFA-0258
31527	Shanne Vallery	Philippines		0	0	0	0	0	2020-0084	OMFTFA-0259
31527	Jhon Dave 2	Philippines		0	0	0	0	0	2020-0033	OMFTFA-0260
31527	Jhon Dave 1	Philippines		0	0	0	0	0	2020-0059	OMFTFA-0261
31527	Lady Loriebel 3	Philippines		0	0	0	0	0	2020-00105	OMFTFA-0262
31527	2 Brothers	Philippines		0	0	0	0	0	2020-0090	OMFTFA-0263
31527	Lyka Ivan	Philippines		0	0	0	0	0	2020-00152	OMFTFA-0264
31527	King Jacob	Philippines		0	0	0	0	0	2020-00114	OMFTFA-0265
31527	Japeth	Philippines		0	0	0	0	0	2020-00125	OMFTFA-0266
31527	The Smart C	Philippines		0	0	0	0	0	2020-0099	OMFTFA-0267
31527	Atasha 3	Philippines		0	0	0	0	0	2020-0096	OMFTFA-0268
31527	Grace Ann 2	Philippines		0	0	0	0	0	2020-0095	OMFTFA-0269
31527	Grace Ann	Philippines		0	0	0	0	0	2020-00117	OMFTFA-0270
31527	Amia Samantha	Philippines		0	0	0	0	0	2020-0060	OMFTFA-0271
31527	John Joseph	Philippines		0	0	0	0	0	2020-00136	OMFTFA-0272
31527	Shailla	Philippines		0	0	0	0	0	2020-00179	OMFTFA-0273
31527	Sea Star	Philippines		0	0	0	0	0	2020-00126	OMFTFA-0274
31527	Precious Bien 2	Philippines		0	0	0	0	0	2020-00108	OMFTFA-0275
31527	E.G Boy	Philippines		0	0	0	0	0	2020-0097	OMFTFA-0276
31527	April Ann	Philippines		0	0	0	0	0	2020-0100	OMFTFA-0277
31527	Ate Nel's	Philippines		0	0	0	0	0	2020-0102	OMFTFA-0278
31527	Queen Roga	Philippines		0	0	0	0	0	2020-0114	OMFTFA-0279
31527	Three Brothers	Philippines		0	0	0	0	0	2020-00166	OMFTFA-0280
31527	Patricia	Philippines		0	0	0	0	0	2020-00165	OMFTFA-0281
31527	Baby Ruby Ann	Philippines		0	0	0	0	0	2020-0070	OMFTFA-0282
31527	Rex Roy	Philippines		0	0	0	0	0	2020-00168	OMFTFA-0283
31527	Mr. Pogi	Philippines		0	0	0	0	0	2020-0078	OMFTFA-0284
31527	M/BCA "ROXAN JANE"	Philippines		0	0	0	0	0	2020-0054	OMFTFA-0285
31527	M/BCA "ROXAN JANE II"	Philippines		0	0	0	0	0	2020-0010	OMFTFA-0286
31527	M/BCA "ROXAN JANE III"	Philippines		0	0	0	0	0	2020-0011	OMFTFA-0287
31527	Al Francis	Philippines		0	0	0	0	0	2020-0052	OMFTFA-0288
31527	Boy Chronel	Philippines		0	0	0	0	0	2020-0104	OMFTFA-0289
31527	Rea Ruselle	Philippines		0	0	0	0	0	2020-0105	OMFTFA-0290
31527	King Jun Jun 4	Philippines		0	0	0	0	0	2020-0101	OMFTFA-0291
31527	King Jun Jun 2	Philippines		0	0	0	0	0	2020-00120	OMFTFA-0292
31527	Queen Krizza Jane	Philippines		0	0	0	0	0	2020-0004	OMFTFA-0293
31527	Tuna Queen 8	Philippines		0	0	0	0	0	2020-0082	OMFTFA-0294
31527	Tuna Queen	Philippines		0	0	0	0	0	2020-0081	OMFTFA-0295
31527	M/BCA "MYRLANDA II"	Philippines		0	0	0	0	0	2020-00112	OMFTFA-0296
31527	Ren Ren	Philippines		0	0	0	0	0	2020-0086	OMFTFA-0297
31527	Unico Hijo	Philippines		0	0	0	0	0	2020-00123	OMFTFA-0298
31527	Lhiam Jade	Philippines		0	0	0	0	0	2020-00122	OMFTFA-0299
31527	Sweet Gina Dave	Philippines		0	0	0	0	0	2020-00143	OMFTFA-0300
31527	Savion Miracle	Philippines		0	0	0	0	0	2020-0086	OMFTFA-0301
31527	Jemica Lyiel	Philippines		0	0	0	0	0	2020-0088	OMFTFA-0302
31527	Von Russel	Philippines		0	0	0	0	0	2020-00173	OMFTFA-0303
31527	Disciple 2	Philippines		0	0	0	0	0	2020-00133	OMFTFA-0304
31527	John Francis	Philippines		0	0	0	0	0	2020-00106	OMFTFA-0305
31527	Lady Loraine	Philippines		0	0	0	0	0	2020-00107	OMFTFA-0306
31527	Golden Boy	Philippines		0	0	0	0	0	2020-0112	OMFTFA-0307
31527	LEER ACHILLES	Philippines		0	0	0	0	0	2020-0065	OMFTFA-0308
31527	ACE ACHILLES	Philippines		0	0	0	0	0	2020-0066	OMFTFA-0309
31527	Lexus	Philippines		0	0	0	0	0	2020-0065	OMFTFA-0310
31527	Kiesha	Philippines		0	0	0	0	0	2020-0064	OMFTFA-0311
31527	ASHLEY KAECEER"	Philippines		0	0	0	0	0	2020-0056	OMFTFA-0312
31527	Prince Arman	Philippines		0	0	0	0	0	2020-00142	OMFTFA-0313
31527	Kristel Lyka Lei	Philippines		0	0	0	0	0	2020-0070	OMFTFA-0314
31527	Lyra Ann 1	Philippines		0	0	0	0	0	2020-0041	OMFTFA-0315
31527	Guilyen	Philippines		0	0	0	0	0	2020-0014	OMFTFA-0316
31527	Princess Norelyn	Philippines		0	0	0	0	0	2020-0023	OMFTFA-0317
31527	Billy Jones 1	Philippines		0	0	0	0	0	2020-0026	OMFTFA-0318
31527	Billy Jones 2	Philippines		0	0	0	0	0	2020-0025	OMFTFA-0319
31527	Unlimited 1	Philippines		0	0	0	0	0	2020-0072	OMFTFA-0320
31527	Gian Carlo	Philippines		0	0	0	0	0	2020-0013	OMFTFA-0321
31527	Guia Alianna	Philippines		0	0	0	0	0	2020-0066	OMFTFA-0322
31527	Freedom	Philippines		0	0	0	0	0	2020-0075	OMFTFA-0323
31527	Blessing of God 2	Philippines		0	0	0	0	0	2020-0062	OMFTFA-0324
31527	Blessing of God	Philippines		0	0	0	0	0	2020-0063	OMFTFA-0325
31527	Sevene 2	Philippines		0	0	0	0	0	2020-0068	OMFTFA-0326
31527	Sevene	Philippines		0	0	0	0	0	2020-0092	OMFTFA-0327
31527	Ronnie Boy	Philippines		0	0	0	0	0	2020-00100	OMFTFA-0328
31527	Blessing of God 1	Philippines		0	0	0	0	0	2020-0074	OMFTFA-0329
31527	Blessing of God 5	Philippines		0	0	0	0	0	2020-0073	OMFTFA-0330
31527	Princess Zandra 2	Philippines		0	0	0	0	0	2020-0057	OMFTFA-0331
31527	Katas ng Blesssing of God	Philippines		0	0	0	0	0	2020-0067	OMFTFA-0332
31527	Annaron 2	Philippines		0	0	0	0	0	2020-0011	OMFTFA-0333
31527	Annaron 3	Philippines		0	0	0	0	0	2020-0007	OMFTFA-0334
31527	Annaron 4	Philippines		0	0	0	0	0	2020-0013	OMFTFA-0335
31527	Annaron 5	Philippines		0	0	0	0	0	2020-0010	OMFTFA-0336
31527	Annaron 6	Philippines		0	0	0	0	0	2020-0012	OMFTFA-0337
31527	Ronalyn	Philippines		0	0	0	0	0	2020-0009	OMFTFA-0338
31527	Aileen	Philippines		0	0	0	0	0	2020-0008	OMFTFA-0339
31527	Lanie J-Ar	Philippines		0	0	0	0	0	2020-00152	OMFTFA-0340
31527	Lady Coreen	Philippines		0	0	0	0	0	2020-0023	OMFTFA-0341
31527	Londel 8	Philippines		0	0	0	0	0	2020-0022	OMFTFA-0342
31527	John Dol	Philippines		0	0	0	0	0	2020-0024	OMFTFA-0343
31527	Mariel	Philippines		0	0	0	0	0	2020-0025	OMFTFA-0344
31527	Mac Mac	Philippines		0	0	0	0	0	2020-0026	OMFTFA-0345
31527	Queen Argelyn	Philippines		0	0	0	0	0	2020-0028	OMFTFA-0346
31527	Tita Nhor 4	Philippines		0	0	0	0	0	2020-0045	OMFTFA-0347
31527	Tita Nhor 5	Philippines		0	0	0	0	0	2020-0047	OMFTFA-0348
31527	Tita Nhor 10	Philippines		0	0	0	0	0	2020-0046	OMFTFA-0349
31527	Tita Nhor 6	Philippines		0	0	0	0	0	2020-0052	OMFTFA-0350
31527	TYL Precious 1	Philippines		0	0	0	0	0	2020-0018	OMFTFA-0351
31527	Princess CJ	Philippines		0	0	0	0	0	2020-0033	OMFTFA-0352
31527	Jezrah	Philippines		0	0	0	0	0	2020-0720	OMFTFA-0353
31527	Princess Jelliane	Philippines		0	0	0	0	0	2020-0668	OMFTFA-0354
31527	Jayson	Philippines		0	0	0	0	0	2020-0647	OMFTFA-0355
31527	Cristalee	Philippines		0	0	0	0	0	2020-0672	OMFTFA-0356
31527	Princess Odre	Philippines		0	0	0	0	0	2020-0646	OMFTFA-0357
31527	Irene	Philippines		0	0	0	0	0	2020-0730	OMFTFA-0358
31527	Jeffrey	Philippines		0	0	0	0	0	2020-0594	OMFTFA-0359
31527	Kiara 2	Philippines		0	0	0	0	0	2020-0716	OMFTFA-0360
31527	Ed	Philippines		0	0	0	0	0	2020-0482	OMFTFA-0361
31527	Bon-bon	Philippines		0	0	0	0	0	2020-0671	OMFTFA-0362
31527	Nagel Kim	Philippines		0	0	0	0	0	2020-0669	OMFTFA-0363
31527	Clarisse	Philippines		0	0	0	0	0	2020-0638	OMFTFA-0364
31527	Justine	Philippines		0	0	0	0	0	2020-0649	OMFTFA-0365
31527	Prince Xyz	Philippines		0	0	0	0	0	2020-0681	OMFTFA-0366
31527	Berlyn	Philippines		0	0	0	0	0	2020-0697	OMFTFA-0367
31527	Ricks Lee	Philippines		0	0	0	0	0	2020-0696	OMFTFA-0368
31527	Bogie	Philippines		0	0	0	0	0	2020-0650	OMFTFA-0369
31527	Angel Khate	Philippines		0	0	0	0	0	OM-22	OMFTFA-0370
31527	Prince Albert	Philippines		0	0	0	0	0	OM-21	OMFTFA-0371
31527	Swabe 4	Philippines		0	0	0	0	0	OM-29	OMFTFA-0372
31527	Swabe 5	Philippines		0	0	0	0	0	OM-18	OMFTFA-0373
31527	Swabe 3	Philippines		0	0	0	0	0	OM-19	OMFTFA-0374
31527	Johny Gean	Philippines		0	0	0	0	0	OM-28	OMFTFA-0375
31527	King Daisy	Philippines		0	0	0	0	0	OM-25	OMFTFA-0376
31527	Lourince	Philippines		0	0	0	0	0	OM-26	OMFTFA-0377
31527	Lady Chriza	Philippines		0	0	0	0	0	OM-23	OMFTFA-0378
31527	Janica	Philippines		0	0	0	0	0	OM-20	OMFTFA-0379
31527	hammerhead 1	Philippines		0	0	0	0	0	'0017/6109294	GLTFFI-0001
31527	Jemric	Philippines		0	0	0	0	0	0263/6116873	GLTFFI-0002
31527	CARL JUSTIN	Philippines		0	0	0	0	0	0262/6116872	GLTFFI-0003
31527	Tuna Fishers Association (TFA)	Philippines		0	0	0	0	0	'0273/6116956	GLTFFI-0004
31527	EASTERN EAGLE	Philippines		0	0	0	0	0	'0315/6117131	GLTFFI-0005
31527	poineer	Philippines		0	0	0	0	0	'0281/6117176	GLTFFI-0006
31527	Invictus	Philippines		0	0	0	0	0	'0325/6117455	GLTFFI-0007
31527	Sunriser	Philippines		0	0	0	0	0	'0326/6117456	GLTFFI-0008
31527	Kaizen	Philippines		0	0	0	0	0	2020-002	GLTFFI-0009
31527	Judy Grace	Philippines		0	0	0	0	0	2020-001	GLTFFI-0010
31527	Lex	Philippines		0	0	0	0	0	2020-004	GLTFFI-0011
31527	Rodel 2	Philippines		0	0	0	0	0	2020-023	GLTFFI-0012
31527	Leon	Philippines		0	0	0	0	0	2020-044	GLTFFI-0013
31527	No Name	Philippines		0	0	0	0	0	2020-007	GLTFFI-0014
31527	5 Brothers	Philippines		0	0	0	0	0	2020-015	GLTFFI-0015
31527	Tala	Philippines		0	0	0	0	0	2020-025	GLTFFI-0016
31527	Rodel 1	Philippines		0	0	0	0	0	2020-027	GLTFFI-0017
31527	Jericson	Philippines		0	0	0	0	0	2020-012	GLTFFI-0018
31527	Jericson	Philippines		0	0	0	0	0	2020-011	GLTFFI-0019
31527	Bryan	Philippines		0	0	0	0	0	2020-040	GLTFFI-0020
31527	Maeann	Philippines		0	0	0	0	0	2020-013	GLTFFI-0021
31527	Marylyn	Philippines		0	0	0	0	0	2020-046	GLTFFI-0022
31527	Vicky	Philippines		0	0	0	0	0	2020-005	GLTFFI-0023
31527	Emmer	Philippines		0	0	0	0	0	2020-039	GLTFFI-0024
31527	R-Uy	Philippines		0	0	0	0	0	2020-041	GLTFFI-0025
31527	Jonas	Philippines		0	0	0	0	0	2020-016	GLTFFI-0026
31527	Harly Quinn	Philippines		0	0	0	0	0	2020-021	GLTFFI-0027
31527	Harly Quinn	Philippines		0	0	0	0	0	2020-022	GLTFFI-0028
31527	Dolie Ben	Philippines		0	0	0	0	0	2020-026	GLTFFI-0029
31527	J B	Philippines		0	0	0	0	0	2020-017	GLTFFI-0030
31527	No Name	Philippines		0	0	0	0	0	2020-042	GLTFFI-0031
31527	No Name	Philippines		0	0	0	0	0	2020-043	GLTFFI-0032
31527	EM	Philippines		0	0	0	0	0	2020-019	GLTFFI-0033
31527	GLTFF	Philippines		0	0	0	0	0	SAG-0260-2020	GLTFFI-0034
31527	GLTFF Inc-Tabaco TFA#5	Philippines		0	0	0	0	0	SAG-0227-2020	GLTFFI-0035
31527	Pia Mae	Philippines		0	0	0	0	0	SAG-0163-2020	GLTFFI-0036
31527	Ian Rose 1	Philippines		0	0	0	0	0	SAG-0220-2020	GLTFFI-0037
31527	GLTFF, INC.	Philippines		0	0	0	0	0	2020-036	GLTFFI-0038
31527	Karen Boots	Philippines		0	0	0	0	0	SAG-0194-2020	GLTFFI-0039
31527	Bunso	Philippines		0	0	0	0	0	SAG-0160-2020	GLTFFI-0040
31527	No Name	Philippines		0	0	0	0	0	SAG-0077-2020	GLTFFI-0041
31527	Jakejillian Mae	Philippines		0	0	0	0	0	SAG-0231-2020	GLTFFI-0042
31527	No Name	Philippines		0	0	0	0	0	SAG-0076-2020	GLTFFI-0043
31527	John Ely	Philippines		0	0	0	0	0	SAG-0154-2020	GLTFFI-0044
31527	Terry	Philippines		0	0	0	0	0	SAG-0130-2020	GLTFFI-0045
31527	Eralin	Philippines		0	0	0	0	0	SAG-0237-2020	GLTFFI-0046
31527	Jeric	Philippines		0	0	0	0	0	SAG-0156-2020	GLTFFI-0047
31527	Samantha	Philippines		0	0	0	0	0	SAG-0216-2020	GLTFFI-0048
31527	Emmel	Philippines		0	0	0	0	0	SAG-0208-2020	GLTFFI-0049
31527	Ian Vanes 1	Philippines		0	0	0	0	0	SAG-0226-2020	GLTFFI-0050
31527	Delyn	Philippines		0	0	0	0	0	2020-031	GLTFFI-0051
31527	Jeanne Princess	Philippines		0	0	0	0	0	SAG-0121-2020	GLTFFI-0052
31527	Jessa Marie	Philippines		0	0	0	0	0	SAG-0078-2020	GLTFFI-0053
31527	Chris Joules Faye	Philippines		0	0	0	0	0	SAG-0177-2020	GLTFFI-0054
31527	Kimbert	Philippines		0	0	0	0	0	SNR-0041-2020	GLTFFI-0055
31527	Jayralee	Philippines		0	0	0	0	0	2020-030	GLTFFI-0056
31527	Anthony	Philippines		0	0	0	0	0	2020-029	GLTFFI-0057
31527	Grazy	Philippines		0	0	0	0	0	RAW-0133-2020	GLTFFI-0058
31527	Monica	Philippines		0	0	0	0	0	RAW-0071-2020	GLTFFI-0059
31527	Ralph Michael	Philippines		0	0	0	0	0	RAW-0054-2020	GLTFFI-0060
31527	Twin Boys	Philippines		0	0	0	0	0	RAW-0079-2020	GLTFFI-0061
31527	Gian 1	Philippines		0	0	0	0	0	RAW-0063-2020	GLTFFI-0062
31527	Althea Lyn	Philippines		0	0	0	0	0	SAG-0150-2020	GLTFFI-0063
31527	No Name	Philippines		0	0	0	0	0	2020-033	GLTFFI-0064
31527	No Name	Philippines		0	0	0	0	0	2020-032	GLTFFI-0065
31527	Emmer	Philippines		0	0	0	0	0	2020-003	GLTFFI-0066
31527	F/B Eric 1	Philippines		0	0	0	0	0	FV-2020-020	GLTFFI-0067
31527	F/B Eric 2	Philippines		0	0	0	0	0	FV-2020-021	GLTFFI-0068
31527	F/B MJ	Philippines		0	0	0	0	0	FV-2020-023	GLTFFI-0069
31527	BFAR5	Philippines		0	0	0	0	0	TW-0276-20	GLTFFI-0070
31527	No Name	Philippines		0	0	0	0	0	TW-00183-20	GLTFFI-0071
31527	F/B Tin-Tin 2	Philippines		0	0	0	0	0	FV-2020-032	GLTFFI-0072
31527	No Name	Philippines		0	0	0	0	0	TW-0068-19	GLTFFI-0073
31527	Patricia #2	Philippines		0	0	0	0	0	TW-0067-19	GLTFFI-0074
31527	No Name	Philippines		0	0	0	0	0	TW-0084-19	GLTFFI-0075
31527	No Name	Philippines		0	0	0	0	0	TW-0083-19	GLTFFI-0076
31527	No Name	Philippines		0	0	0	0	0	TW-00186-20	GLTFFI-0077
31527	F/B Ernie	Philippines		0	0	0	0	0	FV-2020-003	GLTFFI-0078
31527	No Name	Philippines		0	0	0	0	0	TW-0092-19	GLTFFI-0079
31527	No Name	Philippines		0	0	0	0	0	TW-00115-19	GLTFFI-0080
31527	No Name	Philippines		0	0	0	0	0	TW-0096-19	GLTFFI-0081
31527	No Name	Philippines		0	0	0	0	0	TW-0097-13	GLTFFI-0082
31527	No Name	Philippines		0	0	0	0	0	TW-0085-19	GLTFFI-0083
31527	No Name	Philippines		0	0	0	0	0	TW-00101-19	GLTFFI-0084
31527	F/B 7 Brothers 2	Philippines		0	0	0	0	0	FV-2020-025	GLTFFI-0085
31527	F/B Geremy Cope	Philippines		0	0	0	0	0	FV-2020-012	GLTFFI-0086
31527	F/B Clint James	Philippines		0	0	0	0	0	FV-2020-035	GLTFFI-0087
31527	Noel	Philippines		0	0	0	0	0	TW-00278-20	GLTFFI-0088
31527	No Name	Philippines		0	0	0	0	0	TW-00128-19	GLTFFI-0089
31527	No Name	Philippines		0	0	0	0	0	TW-00130-19	GLTFFI-0090
31527	No Name	Philippines		0	0	0	0	0	TW-00221-20	GLTFFI-0091
31527	No Name	Philippines		0	0	0	0	0	TW-00133-19	GLTFFI-0092
31527	No Name	Philippines		0	0	0	0	0	TW-00131-19	GLTFFI-0093
31527	No Name	Philippines		0	0	0	0	0	TW-00145-19	GLTFFI-0094
31527	Jobert	Philippines		0	0	0	0	0	TW-00279-20	GLTFFI-0095
31527	No Name	Philippines		0	0	0	0	0	TW-00144-19	GLTFFI-0096
31527	No Name	Philippines		0	0	0	0	0	TW-00154-19	GLTFFI-0097
31527	No Name	Philippines		0	0	0	0	0	TW-00147-19	GLTFFI-0098
31527	F/B Palolo 1	Philippines		0	0	0	0	0	FV-2020-019	GLTFFI-0099
31527	Patricio / Timothy	Philippines		0	0	0	0	0	TW-0088-19	GLTFFI-0100
31527	No Name	Philippines		0	0	0	0	0	TW-00146-19	GLTFFI-0101
31527	No Name	Philippines		0	0	0	0	0	TW-00151-19	GLTFFI-0102
31527	No Name	Philippines		0	0	0	0	0	TW-00148-19	GLTFFI-0103
31527	No Name	Philippines		0	0	0	0	0	TW-00132-19	GLTFFI-0104
31527	No Name	Philippines		0	0	0	0	0	TW-00155-19	GLTFFI-0105
31527	No Name	Philippines		0	0	0	0	0	TW-00138-19	GLTFFI-0106
31527	No Name	Philippines		0	0	0	0	0	TW-00137-19	GLTFFI-0107
31527	Big / R	Philippines		0	0	0	0	0	TW-00149-19	GLTFFI-0108
31527	No Name	Philippines		0	0	0	0	0	TW-00160-19	GLTFFI-0109
31527	GLTFF/STFA	Philippines		0	0	0	0	0	FV-2020-016	GLTFFI-0110
31527	F/B Compit	Philippines		0	0	0	0	0	FV-2020-017	GLTFFI-0111
31527	F/B GLTFF/STFA	Philippines		0	0	0	0	0	FV-2020-018	GLTFFI-0112
31527	F/B Homer	Philippines		0	0	0	0	0	FV-2020-028	GLTFFI-0113
31527	F/B Vince Yechen	Philippines		0	0	0	0	0	FV-2020-008	GLTFFI-0114
31527	F/B JRC	Philippines		0	0	0	0	0	FV-2020-015	GLTFFI-0115
31527	F/B GLTFF/STFA	Philippines		0	0	0	0	0	FV-2020-034	GLTFFI-0116
31527	F/B Gemalyn	Philippines		0	0	0	0	0	FV-2020-024	GLTFFI-0117
31527	F/B Tin-Tin 1	Philippines		0	0	0	0	0	FV-2020-033	GLTFFI-0118
31527	F/B 7 Brothers 1	Philippines		0	0	0	0	0	FV-2020-026	GLTFFI-0119
31527	F/B Rotary Club of Bongalon Fishermen 14	Philippines		0	0	0	0	0	FV-2020-014	GLTFFI-0120
31527	F/B Mark Ryan	Philippines		0	0	0	0	0	FV-2020-027	GLTFFI-0121
31527	F/B Palolo 2	Philippines		0	0	0	0	0	FV-2020-004	GLTFFI-0122
31527	FB TFARCT 2	Philippines		0	0	0	0	0	CAS-25-024-20-24	GLTFFI-0123
31527	No Name	Philippines		0	0	0	0	0	CAS-25-003-20-3	GLTFFI-0124
31527	FB Sherwin	Philippines		0	0	0	0	0	CAS-25-015-20-15	GLTFFI-0125
31527	FB RCA	Philippines		0	0	0	0	0	CAS-25-004-20-4	GLTFFI-0126
31527	FB JASLYN	Philippines		0	0	0	0	0	CAS-25-001-20-1	GLTFFI-0127
31527	F/V Johnny	Philippines		0	0	0	0	0	SJ-0215-20-05	GLTFFI-0128
31527	F/V Bitang	Philippines		0	0	0	0	0	SJ-0224-20-09	GLTFFI-0129
31527	F/V Baby Lyka	Philippines		0	0	0	0	0	SJ-0127-20-08	GLTFFI-0130
31527	F/V Jay	Philippines		0	0	0	0	0	SJ-0183-20-46	GLTFFI-0131
31527	F/V Christian Jonard	Philippines		0	0	0	0	0	SJ-0317-20-02	GLTFFI-0132
31527	F/V Angeline	Philippines		0	0	0	0	0	SJ-0304-20-04	GLTFFI-0133
31527	F/V Alvin	Philippines		0	0	0	0	0	SJ-0254-20-03	GLTFFI-0134
31527	F/V GLTFF, INC.	Philippines		0	0	0	0	0	SJ-0260-20-01	GLTFFI-0135
31527	F/V Mark Rovin	Philippines		0	0	0	0	0	SJ-0300-20-06	GLTFFI-0136
31527	GLTFF Inc_LETFA1	Philippines		0	0	0	0	0	69419559 Z	GLTFFI-0137
31527	GLTFF Inc_LETFA2	Philippines		0	0	0	0	0	6944842	GLTFFI-0138
31527	FB Gabby	Philippines		0	0	0	0	0	6944843	GLTFFI-0139
31527	FB MIKA HANA 2	Philippines		0	0	0	0	0	6944844	GLTFFI-0140
31527	No Name	Philippines		0	0	0	0	0	0008-2020	GLTFFI-0141
31527	No Name	Philippines		0	0	0	0	0	0007-2020	GLTFFI-0142
31527	No Name	Philippines		0	0	0	0	0	0056-2020	GLTFFI-0143
31527	No Name	Philippines		0	0	0	0	0	0078-2020	GLTFFI-0144
31527	No Name	Philippines		0	0	0	0	0	0446-2020	GLTFFI-0145
31527	No Name	Philippines		0	0	0	0	0	0070-2020	GLTFFI-0146
31527	No Name	Philippines		0	0	0	0	0	0091-2020	GLTFFI-0147
31527	No Name	Philippines		0	0	0	0	0	0474-2020	GLTFFI-0148
31527	No Name	Philippines		0	0	0	0	0	0415-2020	GLTFFI-0149
31527	No Name	Philippines		0	0	0	0	0	0045-2020	GLTFFI-0150
31527	No Name	Philippines		0	0	0	0	0	0025-2020	GLTFFI-0151
31527	No Name	Philippines		0	0	0	0	0	0386-2020	GLTFFI-0152
31527	No Name	Philippines		0	0	0	0	0	0061-2020	GLTFFI-0153
31527	No Name	Philippines		0	0	0	0	0	0092-2020	GLTFFI-0154
31527	No Name	Philippines		0	0	0	0	0	0059-2020	GLTFFI-0155
31527	BOBOY	Philippines		0	0	0	0	0	SAT-003-20	GLTFFI-0156
31527	Andy	Philippines		0	0	0	0	0	SAT-007-20	GLTFFI-0157
31527	Jammel	Philippines		0	0	0	0	0	SAT-001-20	GLTFFI-0158
31527	JR	Philippines		0	0	0	0	0	SAT-004-20	GLTFFI-0159
31527	Ryan	Philippines		0	0	0	0	0	SAT-002-20	GLTFFI-0160
31527	Gift of God	Philippines		0	0	0	0	0	SAT-006-20	GLTFFI-0161
31527	FHER	Philippines		0	0	0	0	0	SAT-005-20	GLTFFI-0162
31527	Saldomar	Philippines		0	0	0	0	0	SAG-0219-2020	GLTFFI-0163
31527	No Name	Philippines		0	0	0	0	0	TW-0248-20	GLTFFI-0164
31527	No Name	Philippines		0	0	0	0	0	TW-0057-19	GLTFFI-0165
31527	No Name	Philippines		0	0	0	0	0	TW-0056-19	GLTFFI-0166
31527	No Name	Philippines		0	0	0	0	0	TW-0234-20	GLTFFI-0167
31527	No Name	Philippines		0	0	0	0	0	TW-0062-19	GLTFFI-0168
31527	No Name	Philippines		0	0	0	0	0	TW-0232-20	GLTFFI-0169
31527	No Name	Philippines		0	0	0	0	0	TW-0059-19	GLTFFI-0170
31527	No Name	Philippines		0	0	0	0	0	TW-0275-20	GLTFFI-0171
31527	No Name	Philippines		0	0	0	0	0	TW-0203-20	GLTFFI-0172
31527	No Name	Philippines		0	0	0	0	0	TW-0233-20	GLTFFI-0173
31527	No Name	Philippines		0	0	0	0	0	TW-00140-19	GLTFFI-0174
31527	No Name	Philippines		0	0	0	0	0	6708996	GLTFFI-0175
31527	No Name	Philippines		0	0	0	0	0	6709360	GLTFFI-0176
31527	No Name	Philippines		0	0	0	0	0	6708953	GLTFFI-0177
31527	El Salvador	Philippines		0	0	0	0	0	6708995	GLTFFI-0178
31527	MTFA 1	Philippines		0	0	0	0	0	6709185	GLTFFI-0179
31527	Jhon Abby	Philippines		0	0	0	0	0	SAG-0180-2020	GLTFFI-0180
31527	4J	Philippines		0	0	0	0	0	SAG-0125-2020	GLTFFI-0181
31527	MHACSHE	Philippines		0	0	0	0	0	SAG-0127-2020	GLTFFI-0182
31527	Emean Nelse	Philippines		0	0	0	0	0	SAG-0153-2020	GLTFFI-0183
31527	TRIPLY BOYS	Philippines		0	0	0	0	0	SAG-0207-2020	GLTFFI-0184
31527	Erven	Philippines		0	0	0	0	0	SAG-0176-2020	GLTFFI-0185
31527	NOLIMER 3	Philippines		0	0	0	0	0	SAG-0223-2020	GLTFFI-0186
31527	Jocel	Philippines		0	0	0	0	0	SAG-0158-2020	GLTFFI-0187
31527	ADAM GABRIEL	Philippines		0	0	0	0	0	SAG-0242-2020	GLTFFI-0188
31527	DON LEE 2	Philippines		0	0	0	0	0	SAG-0230-2020	GLTFFI-0189
31527	JOHN REY	Philippines		0	0	0	0	0	SAG-0218-2020	GLTFFI-0190
31527	EL JANZA	Philippines		0	0	0	0	0	SAG-0205-2020	GLTFFI-0191
31527	Ivy Jon	Philippines		0	0	0	0	0	SAG-0162-2020	GLTFFI-0192
31527	BABY JOHNY	Philippines		0	0	0	0	0	SAG-0172-2020	GLTFFI-0193
31527	JOMARIE	Philippines		0	0	0	0	0	SAG-0124-2020	GLTFFI-0194
31527	REIN GRACE	Philippines		0	0	0	0	0	SAG-0214-2020	GLTFFI-0195
31527	John Lyn	Philippines		0	0	0	0	0	SAG-0155-2020	GLTFFI-0196
31527	No Name	Philippines		0	0	0	0	0	TW-0086-19	GLTFFI-0197
31527	No Name	Philippines		0	0	0	0	0	TW-0282-20	GLTFFI-0198
31527	No Name	Philippines		0	0	0	0	0	TW-0141-19	GLTFFI-0199
31527	No Name	Philippines		0	0	0	0	0	TW-0116-19	GLTFFI-0200
31527	No Name	Philippines		0	0	0	0	0	TW-0162-20	GLTFFI-0201
	MSC-F-31275
	Japanese Pole and Line skipjack and albacore tuna fishery	MSC ELIGIBILITY START DATE	MSC ELIGIBILITY END DATE	CLIENT CONTACT:	CERTIFIER CONTACT:
	4 vessels, Estimated 120 crew	2022-04-16	2027-04-15	Matsunaga	LRQA Martin Gill
	Notes: Yaizu and Shiogama ports				Yiva Longva
					fisheries@lrqa.com
31275	Meiho Maru No.22	Japan		1	1	0	0	1
31275	Meiho Maru No.37	Japan		1	1	0	0	1
31275	Toyokuni Maru No.08	Japan		1	1	0	0	1
31275	Shoki Maru No.35	Japan		1	1	0	0	1
	MSC in assessment > certified 29 June 2023 > MSC-F-31600
	DFC/HEC Western and Central Pacific longline bigeye, yellowfin and albacore tuna fishery	MSC ELIGIBILITY START DATE	MSC ELIGIBILITY END DATE	CLIENT CONTACT:	CERTIFIER CONTACT:
	15 vessels listed in the draft certification reports, Estimated 225 crew	2023-06-29	2028-06-28	Hansung Enterprise Co. Ltd	Control Union fisheriesuk@controlunion.com
	Notes: Dongwon + Hansung, 2 variations			Dongwon Fisheries Company
	Stakeholder announcement about MEGVAR on November 28, 2022. The MSC approved a Mega Variation (MEGVAR) request on 14 February 2019 to harmonise the timelines on conditions related to Principle 1 for Highly Migratory Stock (HMS) fisheries. A condition included in the MEGVAR is for “All new or in required must be aligned with the applicable timelines given in Appendix A, as per the guidance in the …
	fisheriesuk@controlunion.com Variance granted 17 November 2022
31600	No. 617 Dong Won	Korea	DONGWON FISHERIES Co., Ltd No charterer	0	0	0	0	0	8714023
31600	No. 618 Dong Won	Korea	DONGWON FISHERIES Co., Ltd No charterer	0	0	0	0	0	8815669
31600	No. 619 Dong Won	Korea	DONGWON FISHERIES Co., Ltd No charterer	0	0	0	0	0	8815671
31600	No. 620 Dong Won	Korea	DONGWON FISHERIES Co., Ltd No charterer	0	0	0	0	0	8821498
31600	No. 621 Dong Won	Korea	DONGWON FISHERIES Co., Ltd No charterer	0	0	0	0	0	8905567
31600	No. 623 Dong Won	Korea	DONGWON FISHERIES Co., Ltd No charterer	0	0	0	0	0	8905581
31600	No. 631 Dong Won	Korea	DONGWON FISHERIES Co., Ltd No charterer	0	0	0	0	0	8911310
31600	No. 633 Dong Won	Korea	DONGWON FISHERIES Co., Ltd No charterer	0	0	0	0	0	8911334
31600	No. 632 Dong Won	Korea	DONGWON FISHERIES Co., Ltd No charterer	0	0	0	0	0	8911322
31600	Chilsung No. 1	Korea	DONGWON FISHERIES Co., Ltd No charterer	0	0	0	0	0	8717855
31600	No. 38 Hansung	Korea	HANSUNG ENTERPRISE CO.,LTD	0	0	0	0	0	8717843
31600	No. 39 Hansung	Korea	HANSUNG ENTERPRISE CO.,LTD	0	0	0	0	0	9046409
31600	No.36 Hansung	Korea	HANSUNG ENTERPRISE CO.,LTD	0	0	0	0	0	8619388
31600	No. 650 Dong Won	Korea	DONGWON FISHERIES Co., Ltd No charterer	0	0	0	0	0	9036715
31600	No. 622 Dong Won	Korea	DONGWON FISHERIES Co., Ltd No charterer	0	0	0	0	0	8905579
	MSC-F-31430
	Australia Eastern Tuna and Billfish Fishery (albacore tuna, yellowfin tuna, bigeye tuna and swordfish)	MSC ELIGIBILITY START DATE	MSC ELIGIBILITY END DATE	CLIENT CONTACT:	CERTIFIER CONTACT:
	30 vessels, Estimated 180 crew	2020-08-27	2026-02-26		bio.inspecta AU and q.Inspecta Swiss
	Notes: 1 vessel not found on WCPFC registry
31430	D&D	Australia	ABBOTT FISHERIES	0	1	1	0	0	FB44241Q
31430	Straight Shooter	Australia	WHAN & BOXSELL PTY LTD	0	1	1	0	0	LFB13064
31430	Esbjorn	Australia	ESBJORN CO PTY LTD	0	1	1	0	0	O767
31430	Scorpion II	Australia	SCORPION CO PTY LTD	0	1	1	0	0	O527
31430	Emnicus	Australia	VYNBAN PTY. LIMITED	0	1	1	0	0	BX9
31430	Calibre	Australia	Not found on WCPFC but was formerly	0	1	1	0	0	RFB12913
31430	Jordan Kate	Australia	ANGELICA FISHERIES PTY LTD	0	1	1	0	0	LFB12747
31430	Angelica	Australia	ANGELICA FISHERIES PTY LTD	0	1	1	0	0	LFB12748
31430	Volition	Australia	CAMILLO R PUGLISI	0	1	1	0	0	LFB10615
31430	Fisco 1	Australia	DDD LAVALLE FISHERIES PTY LTD	0	1	1	0	0	LFB11375
31430	Kaybeanna	Australia	F.M.F PIRRELLO & FMC FISHERIES PTY LTD	0	1	1	0	0	LFB12939
31430	Gracie P	Australia	GRACIE P PTY LTD	0	1	1	0	0	LFB11897
31430	Mira S	Australia	JOHN M SKOLJAREV	0	1	1	0	0	VMJI
31430	South Seas 1	Australia	LAVALLE FISHERIES PTY LTD	0	1	1	0	0	N5712
31430	Markana	Australia	LAVALLE FISHERIES PTY LTD	0	1	1	0	0	O517
31430	Miss Deb a Dell II	Australia	ALBATROSS FISHERIES PTY LTD	0	1	1	0	0	2314
31430	Diamax	Australia	HAPUKU FISHERIES PTY LIMITED	0	1	1	0	0	LFB0636
31430	Hapuku II	Australia	HAPUKU FISHERIES PTY LIMITED	0	1	1	0	0	LFB11985
31430	Papanui	Australia	VINCE PAVIA	0	1	1	0	0	O735
31430	Total	Australia	LAMASON, ROBERT & LAMASON, ANN	0	1	1	0	0	LFB11735
31430	Rummage	Australia	PAUL ZOLEZZI	0	1	1	0	0	O850
31430	Sniper	Australia	SNIPER FISHING PTY LTD	0	1	1	0	0	LFB12035
31430	Strikeforce	Australia	MATTHEW J GOODWIN	0	1	1	0	0	LFB12297
31430	Assassin	Australia	WALKER SEAOODS AUSTRALIA PTY LTD	0	1	1	0	0	LFB12904
31430	Comanche I	Australia	WALKER SEAFOODS AUSTRALIA PTY LTD	0	1	1	0	0	O506
31430	Sharp Shooter II	Australia	WALKER SEAFOODS AUSTRALIA PTY LTD	0	1	1	0	0	900769
31430	Predator	Australia	WALKER SEAFOODS AUSTRALIA PTY LTD	0	1	1	0	0	O509
31430	Santa Lucia	Australia	WALKER SEAFOODS AUSTRALIA PTY LTD	0	1	1	0	0	RFB123129
31430	San Ferdy	Australia	SALVATORE G CAMPISI	0	1	1	0	0	VNZ3028
31430	Lansera	Australia	F.C. & S. CAMPISI PTY LTD	0	1	1	0	0	457592
	MSC-F-31497
	Kiribati albacore, bigeye and yellowfin tuna longline fishery	MSC ELIGIBILITY START DATE	MSC ELIGIBILITY END DATE	CLIENT CONTACT:	CERTIFIER CONTACT:
	6 vessels, Estimated 90 crew	2021-01-19	2026-01-18	Zhousan Pacific Tuna Pelagic Fisheries Co. Ltd	Control Union fisheriesuk@controlunion.com
	Notes:Charterer client is Kiribati Fish Ltd. No vessel list posted despite nearly 2 years certified, obtained from certifier; 3 variation requests
31497	Tai Ping Yang 01	China	Zhousan Pacific Tuna Pelagic Fisheries Co. Ltd	1	1	0	0	1	BZW9M	11546
31497	Tai Ping Yang 02	China	Zhousan Pacific Tuna Pelagic Fisheries Co. Ltd	1	1	0	0	1	BZW1N	11547
31497	Tai Ping Yang 03	China	Zhousan Pacific Tuna Pelagic Fisheries Co. Ltd	1	1	0	0	1	BZUO8	11681
31497	Tai Ping Yang 05	China	Zhousan Pacific Tuna Pelagic Fisheries Co. Ltd	1	1	0	0	1	BZUO9	11682
31497	Tai Ping Yang 06	China	Zhousan Pacific Tuna Pelagic Fisheries Co. Ltd	1	1	0	0	1	BZUX	11740
31497	Tai Ping Yang 07	China	Zhousan Pacific Tuna Pelagic Fisheries Co. Ltd	1	1	0	0	1	BZUX2	11741
	MSC-F-31408
	PT Citraraja Ampat, Sorong pole and line Skipjack and Yellowfin Tuna	MSC ELIGIBILITY START DATE	MSC ELIGIBILITY END DATE	CLIENT CONTACT:	CERTIFIER CONTACT:
	35 vessels, Estimated 1050 crew	2018-11-22	2024-05-22	PT. CITRARAJA AMPAT CANNING	DNV jodi.bostrom@dnv.com
	Notes: None of these vessels were found on WCPFC but here 2 WCP 71 tuna stocks are the units of certification. Note sent 28/2/23 to the CAB to ask why. Suspended by its cannery client 20/11/22
31408	ASPAC 01	Indonesia	May be cargo ship Asia Pacific 01 registered to Indonesia https://www.marinetraffic.com/en/ais/details/ships/shipid:4052674/mmsi:525012396/imo:8614338/vessel:ASIA_PACIFIC_1	0	1	1	1	0
31408	ASPAC 03	Indonesia	Not found on WCPFC, vesselfinder or marine traffic	0	1	1	1	0
31408	ASPAC 05	Indonesia	Not found on WCPFC, vesselfinder or marine traffic	0	1	1	1	0
31408	ASPAC 06	Indonesia	Not found on WCPFC, vesselfinder or marine traffic	0	1	1	1	0
31408	ASPAC 09	Indonesia	Not found on WCPFC, vesselfinder or marine traffic	0	1	1	1	0
31408	ASPAC 11	Indonesia	Not found on WCPFC, vesselfinder or marine traffic	0	1	1	1	0
31408	ASPAC 12	Indonesia	Not found on WCPFC, vesselfinder or marine traffic	0	1	1	1	0
31408	ASPAC 15	Indonesia	Not found on WCPFC, vesselfinder or marine traffic	0	1	1	1	0
31408	ASPAC 16	Indonesia	Not found on WCPFC, vesselfinder or marine traffic	0	1	1	1	0
31408	ASPAC 17	Indonesia	Not found on WCPFC, vesselfinder or marine traffic	0	1	1	1	0
31408	ASPAC 18	Indonesia	Not found on WCPFC, vesselfinder or marine traffic	0	1	1	1	0
31408	CINTA Bahari 04	Indonesia	Not found on WCPFC, vesselfinder or marine traffic	0	1	1	1	0
31408	Cinta Bahari 06	Indonesia	Not found on WCPFC, vesselfinder or marine traffic	0	1	1	1	0
31408	Cinta Bahari 07	Indonesia	Not found on WCPFC, vesselfinder or marine traffic	0	1	1	1	0
31408	Cinta Bahari 08	Indonesia	Not found on WCPFC, vesselfinder or marine traffic	0	1	1	1	0
31408	Cinta Bahari 09	Indonesia	Not found on WCPFC, vesselfinder or marine traffic	0	1	1	1	0
31408	Cinta Bahari 10	Indonesia	Not found on WCPFC, vesselfinder or marine traffic	0	1	1	1	0
31408	Cinta Bahari 12	Indonesia	Not found on WCPFC, vesselfinder or marine traffic	0	1	1	1	0
31408	KCBS 03	Indonesia	Not found on WCPFC, vesselfinder or marine traffic	0	1	1	1	0
31408	Minta Fintura 01	Indonesia	Not found on WCPFC, vesselfinder or marine traffic	0	1	1	1	0
31408	Minta Fintura 03	Indonesia	Not found on WCPFC, vesselfinder or marine traffic	0	1	1	1	0
31408	Solafide	Indonesia	Not found on WCPFC, vesselfinder or marine traffic	0	1	1	1	0
31408	Teluk Marchesa	Indonesia	Not found on WCPFC, vesselfinder or marine traffic	0	1	1	1	0
31408	Tunas Jaya 01	Indonesia	Not found on WCPFC, vesselfinder or marine traffic, could be KM Tuna Jaya https://www.marinetraffic.com/en/ais/details/ships/shipid:6466873/mmsi:525900320/imo:0/vessel:KM_TUNA_JAYA	0	1	1	1	0
31408	Tunas Jaya 02	Indonesia	Not found on WCPFC, vesselfinder or marine traffic	0	1	1	1	0
31408	Sinar Bahari 01	Indonesia	Not found on WCPFC, vesselfinder or marine traffic	0	1	1	1	0
31408	Cinta Bahari 02	Indonesia	Not found on WCPFC, vesselfinder or marine traffic	0	1	1	1	0
31408	Cahaya Mulia 02	Indonesia	Not found on WCPFC, vesselfinder or marine traffic	0	1	1	1	0
31408	Cinta Bahari 11	Indonesia	Not found on WCPFC, vesselfinder or marine traffic	0	1	1	1	0
31408	Marcelino 01	Indonesia	Not found on WCPFC, vesselfinder or marine traffic	0	1	1	1	0
31408	Marcelino 03	Indonesia	Not found on WCPFC, vesselfinder or marine traffic	0	1	1	1	0
31408	Sibela Star	Indonesia	Not found on WCPFC, vesselfinder or marine traffic	0	1	1	1	0
31408	Karya Samudra	Indonesia	Not found on WCPFC, vesselfinder or marine traffic	0	1	1	1	0
31408	Shavur 02	Indonesia	Not found on WCPFC, vesselfinder or marine traffic	0	1	1	1	0
31408	Shavur 03	Indonesia	Not found on WCPFC, vesselfinder or marine traffic	0	1	1	1	0
	MSC in assesment
	Tri Marine Pacific Ocean longline tuna fishery	MSC ELIGIBILITY START DATE	MSC ELIGIBILITY END DATE	CLIENT CONTACT:	CERTIFIER CONTACT:
	92 vessels, Estimated 1380 crew, 19 vessels not found on RFMO registries (21%)			Tri Marine International (PTE) LTD	SCS Gabriela Anhalzer ganhalzer@scsglobalservices.com
	Notes: Combines 2 RFMOs, 2 Variances given 20/4/22 to expand the UoA and to permit a remote audit
	Chao Fa 6	Chinese Taipei	LIN, HUI-PING	0	0	0	0	0	8539095
	Chao Yi 188	Chinese Taipei	LEE I TING	0	0	0	0	0	8541581
	Chao Yi 368	Chinese Taipei	TSENG, HSIANG-CHING	0	0	0	0	0	8341319
	Cheng Jhan Hsiang	Chinese Taipei	HUNG CHEN, LI-CHING	0	0	0	0	0	8794736
	Chien Yuan Ming	Chinese Taipei	TSENG, YI-CHING	0	0	0	0	0	8564715
	Ching Cheng Fu 66	Chinese Taipei	CHEN, YING-PING	0	0	0	0	0	8795479
	Chu Huai 368	Chinese Taipei	TSAI, JUI-CHUNG	0	0	0	0	0	8777312
	Chu Huai 628	Chinese Taipei	TSAI, RUEI JUNG	0	0	0	0	0	8782886
	Chu Huai 668	Chinese Taipei	TSAI, JUI CHUNG	0	0	0	0	0	8777324
	Chu Huai 886	Chinese Taipei	TSAI, JUI CHUNG	0	0	0	0	0	8777348
	Chu Huai 888	Chinese Taipei	CHEN, AI CHUN	0	0	0	0	0	8777350
	Chuan Fa Shian 88	Chinese Taipei	SU, SIN-REN	0	0	0	0	0	8792946
	Chuan Hsiang 368	Chinese Taipei	TSAI, CHIN-TE	0	0	0	0	0	8777374
	Chuan Hsiang 866	Chinese Taipei	TSAI, HUEI-CHUAN	0	0	0	0	0	8542262
	Chuan Hsin 128	Chinese Taipei	TSAI,HUNG-MING	0	0	0	0	0	8777386
	Chuan Shyang 22	Chinese Taipei	TSAI HUANG, MEI-KUEI	0	0	0	0	0	8534904
	Chuan Shyang 98	Chinese Taipei	TSAI, I-CHIN	0	0	0	0	0	8777398
	Da Sheng	Chinese Taipei	BAI LI FISHERY LTD.	0	0	0	0	0	8674962
	Dar Long Cheng No.2	Chinese Taipei	HWANG, LIH-TYNG	0	0	0	0	0	8535635
	Fwu Maan No.88	Chinese Taipei	WU, BOR-SHYAN	0	0	0	0	0	8782460
	Hsieh Ta	Chinese Taipei	PIN CHENG FISHERY CO., LTD	0	0	0	0	0	8961494
	Jin Chin Fu 68	Chinese Taipei	CHEN, WEI-JEN	0	0	0	0	0	8790821
	Jin Chin I 16	Chinese Taipei	LAI, PEI-CHUN	0	0	0	0	0	8523955
	Jin Hong Cheng	Chinese Taipei	JIN HONG CHENG FISHERY CO., LTD	0	0	0	0	0	8661783
	Jin Hsiang Fa	Chinese Taipei	WU, SHIH HSIANG	0	0	0	0	0	8777740
	Jin Hsiang Man	Chinese Taipei	LI, TING-JIE	0	0	0	0	0	8794748
	Jin Hsiang Wang	Chinese Taipei	JIN HSIANG FA FISHERY CO., LTD	0	0	0	0	0	9772644
	Jin Hung Cheng	Chinese Taipei	HUANG, CHIH-LIANG	0	0	0	0	0	8550635
	Jin Hung Man	Chinese Taipei	HUNG, CHIUNG-YING	0	0	0	0	0	8787757
	Jin Jinn Yi 168	Chinese Taipei	TSAY, JENQ-MIIN	0	0	0	0	0	8661836
	Jin Jinn Yi 26	Chinese Taipei	TSAI,CHENG-YI	0	0	0	0	0	8792958
	Jin Jinn Yi 33	Chinese Taipei	CAI, MING-JING	0	0	0	0	0	8792960
	Jin Jinn Yi 36	Chinese Taipei	TSAI, CHENG-YI	0	0	0	0	0	8749080
	Jin Jinn Yi 368	Chinese Taipei	JIN JINN YI FISHERY CO., LTD	0	0	0	0	0	9907146
	Jin Jinn Yi 66	Chinese Taipei	CHEN, CHUN-ZHI	0	0	0	0	0	8749092
	Jin Man 66	Chinese Taipei	HUANG, HAN-PING	0	0	0	0	0	8558417
	Jin Shun 88	Chinese Taipei	HUNG, HSIANG-CHI	0	0	0	0	0	8795261
	Jin Tsai Fu 168	Chinese Taipei	FU DA FISHERY CO.,LTD.	0	0	0	0	0	9639000
	Jin Tsai Fu 888	Chinese Taipei	FU YI FISHERY CO., LTD	0	0	0	0	0	8649498
	Jin Wen 99	Chinese Taipei	Not found on either WCPFC or IATTC	0	0	0	0	0	8748737
	Jing Man No.168	Chinese Taipei	Not found on either WCPFC or IATTC	0	0	0	0	0	8341204
	Li Cheng 28	Chinese Taipei	HSU, CHING TSUAN	0	0	0	0	0	8782915
	Li Hung 666	Chinese Taipei	CHEN, YU CHIN	0	0	0	0	0	8792659
	Li Hung 868	Chinese Taipei	WANG CHIH CHIANG	0	0	0	0	0	8782927
	Lian Sheng 168	Chinese Taipei	YU, CHUN-WEN	0	0	0	0	0	8532358
	Lian Sheng 369	Chinese Taipei	YONG SHENG FISHERY CO., LTD	0	0	0	0	0	9832614
	Maan Yih Feng 16	Chinese Taipei	LIANG JI PING	0	0	0	0	0	8783725
	Maan Yih Feng 166	Chinese Taipei	CHERN, SHUENN TYAN	0	0	0	0	0	8526086
	Maan Yih Feng 26	Chinese Taipei	LIANG, TZU-CHAN	0	0	0	0	0	8791239
	Maan Yih Feng 266	Chinese Taipei	LIANG JI PING	0	0	0	0	0	8777788
	Maan Yih Feng 366	Chinese Taipei	MAAN YIH FENG FISHERY CO., LTD.	0	0	0	0	0	8748749
	Maan Yu Feng 3	Chinese Taipei	HUANG, YU-LI	0	0	0	0	0	8792661
	Man I Feng 22	Chinese Taipei	HUNG, WAN-TING	0	0	0	0	0	8541579
	Man Yi Feng 66	Chinese Taipei	CHERN, JYH-HWA	0	0	0	0	0	8791241
	Man Ying Cai 6	Chinese Taipei	CHEN LIN, LI-LING	0	0	0	0	0	8547212
	Sea Hawk 2	Chinese Taipei	Not found on either WCPFC or IATTC	0	0	0	0	0	8791447
	Shen Long Yu 268	Chinese Taipei	YANG YAN RU	0	0	0	0	0	8526103
	Shen Long Yu 31	Chinese Taipei	CHEN, FU YU	0	0	0	0	0	8534100
	Shin Jaan Shin	Chinese Taipei	CHEN, SHIN-DEAN	0	0	0	0	0	8790819
	Shin Jaan Shin 368	Chinese Taipei	CHEN, JENN-SHYONG	0	0	0	0	0	8783737
	Shin Jaan Shin 66	Chinese Taipei	Not found on either WCPFC or IATTC	0	0	0	0	0	8792984
	Shin Jyi Wang 6	Chinese Taipei	Not found on either WCPFC or IATTC	0	0	0	0	0	8792685
	Jin Jinn Yi No.668	Chinese Taipei	TSAI, CHENG HUNG	0	0	0	0	0	8524284
	Shun Rong No.8	Chinese Taipei	CAI, RUI-QI	0	0	0	0	0	8563058
	Shunn Shing 626	Chinese Taipei	Not found on either WCPFC or IATTC	0	0	0	0	0	8629266
	Te Yun 16	Chinese Taipei	Not found on either WCPFC or IATTC	0	0	0	0	0	8783713
	Yi Siang 1	Chinese Taipei	CHI, YU-YUN	0	0	0	0	0	8525795
	Yi Siang 6	Chinese Taipei	TSENG, CHIN-HUA	0	0	0	0	0	8525812
	Yi Siang 8	Chinese Taipei	CHEN, MING-CHE	0	0	0	0	0	8525824
	You Fu	Chinese Taipei	HUNG, KUO-HUI	0	0	0	0	0	8341216
	Yu Feng 128	Chinese Taipei	JHANG, WAN-SHENG	0	0	0	0	0	8526098
	Yu Feng 513	Chinese Taipei	CHANG HSIN LING	0	0	0	0	0	8649034
	Yu Long	Chinese Taipei	Not found on either WCPFC or IATTC	0	0	0	0	0	8778421
	Yu Long 10	Chinese Taipei	Not found on either WCPFC or IATTC	0	0	0	0	0	8778433
	Yu Long 12	Chinese Taipei	Not found on either WCPFC or IATTC	0	0	0	0	0	8778445
	Yu Long 18	Chinese Taipei	Not found on either WCPFC or IATTC	0	0	0	0	0	8778457
	Yu Long Fa 168	Chinese Taipei	Not found on either WCPFC or IATTC	0	0	0	0	0	8526074
	Yu Long Fa 22	Chinese Taipei	Not found on either WCPFC or IATTC	0	0	0	0	0	8526050
	Yu Long Fa 36	Chinese Taipei	Not found on either WCPFC or IATTC	0	0	0	0	0	8526062
	Yi Man	Chinese Taipei	CHEN, CHIA CHENG	0	0	0	0	0	8777879
	Yi Man No.3	Chinese Taipei	CHEN, CHIA-CHENG	0	0	0	0	0	8778380
	Yi Man No.8	Chinese Taipei	CHEN, CHIA-CHENG	0	0	0	0	0	8788878
	Kai Sheng	Chinese Taipei	LIU, YU-JING	0	0	0	0	0	8777776
	Chin Chun 12	Vanuatu	Sheng Sheng Fishery Company, Ltd.	0	0	0	0	0	9289
	Da Wen	Vanuatu	Da Wen Fishery Company Ltd	0	0	0	0	0	9299
	Da Yu 2	Vanuatu	Not found on either WCPFC or IATTC	0	0	0	0	0
	Grand East	Vanuatu	Grand East Fishery Company, Ltd.	0	0	0	0	0	4749
	Hong An	Vanuatu	Not found on either WCPFC or IATTC	0	0	0	0	0
	Kin Shun An 6	Vanuatu	Not found on either WCPFC or IATTC	0	0	0	0	0
	Long Bow 1	Vanuatu	Longbow Fishery Company, Ltd.	0	0	0	0	0	9309
	Long Bow 7	Vanuatu	LONGBOW FISHERY CO., LTD.	0	0	0	0	0
	More Rich	Vanuatu	SUN RISE FISHERY CO., LTD	0	0	0	0	0
	To Chan No.2	Vanuatu	Not found on either WCPFC or IATTC	0	0	0	0	0
	To Yu No.2	Vanuatu	To Yu Ocean Enterprise Company, Ltd.	0	0	0	0	0	16092
	Yong An	Vanuatu	Not found on either WCPFC or IATTC	0	0	0	0	0
	MSC-F-31555
	SI WCPO skipjack and yellowfin tuna purse seine fishery	MSC ELIGIBILITY START DATE	MSC ELIGIBILITY END DATE	CLIENT CONTACT:	CERTIFIER CONTACT:
	6 vessels, Estimated 168 crew	2022-07-07	2027-07-06	Itochu	SCS mscfisheries@scsglobalservices.com
	Notes: Vessel list 15 July 2022, all Korea listed under Itochu Corporation (Japan), Variance
	Port is Tarawa, Kiribati									IMO
31555	SAJO ALEXANDRIA	KOREA	SAJO INDUSTRIES Co., Ltd	1	1	1	0	1	1401001-6261403	9683635
31555	SAJO COLUMBIA	KOREA	SAJO INDUSTRIES Co., Ltd	1	1	1	0	1	1207001-6261405	9618379
31555	SAJO CONCORDIA	KOREA	SAJO INDUSTRIES Co., Ltd	1	1	1	0	1	1703002-6261402	9699593
31555	SAJO FAMILIA	KOREA	SAJO INDUSTRIES Co., Ltd	1	1	1	0	1	1211001-6261406	9619323
31555	SAJO POSEDONIA	KOREA	OYANG CORPORATION	1	1	1	0	1	1311001-6261404	9683623
31555	SAJO POTENTIA	KOREA	SAJO SEAFOOD Co., Ltd	1	1	1	0	1	1002001-6261105	9587063
	In assessment during reseearch > certified 20 June 2023 > MSC-F-31594
	Tuna Alliance Atlantic albacore longline fishery	MSC ELIGIBILITY START DATE	MSC ELIGIBILITY END DATE	CLIENT CONTACT:	CERTIFIER CONTACT:
	20 vessels, Estimated 600 crew	2023-06-20	2028-06-19	Tuna Alliance, Inc.	SCS mscfisheries@scsglobalservices.com
	Notes: 842 MT/year from only 3 vessels permitted to fish ALB N and S + 8 permitted to fish ALB N + 15 to fish ALB S. Variation granted				Taiwan
31594	Yun Mao No.1	Taiwan	YUN MAO FISHERY CO., LTD.	0	0	0	0	0	CT6-1507	9876581
31594	Yun Mao No.8	Taiwan	SIN MAO FISHERY CO., LTD.	0	0	0	0	0	CT6-1522	9899868
31594	Yun Mao No.101	Taiwan	CYUN MAO CING FISHERY CO., LTD	0	0	0	0	0	CT6-1524	9911953
31594	Yun Mao No.102	Taiwan	DIN MAO FISHERY CO., LTD	0	0	0	0	0	CT6-1519	9889203
31594	Yun Mao No.168	Taiwan	HSU MING HUNG	0	0	0	0	0	CT6-1449	9776315
31594	Yuh Mao No.106	Taiwan	YUN MAO OCEAN ENTERPRISE CO., LTD.	0	0	0	0	0	CT6-1036	8417792
31594	Sheng Mao No.222	Taiwan	HAO MAO FISHERY CO., LTD	0	0	0	0	0	CT6-1042	8648406
31594	Fu Mao No.268	Taiwan	JUE MAO FISHERY CO., LTD.	0	0	0	0	0	CT7-0594	9395812
31594	Chien Tsao No.322	Taiwan	HONG SEN FISHERY CO., LTD.	0	0	0	0	0	CT6-1003	8417077
31594	Chien Jui No.102	Taiwan	HUNG CHUAN FISHERY CO., LTD.	0	0	0	0	0	CT6-1004	8417065
31594	Chin Chang Long	Taiwan	CHIN CHANG SIN OCEAN ENTERPRISE CO.	0	0	0	0	0	CT6-1013	8648212
31594	Chin Liang Mei	Taiwan	CHIN LIANG MEI OCEANIC ENTERPRISE CO., LTD.	0	0	0	0	0	CT6-1021	8648262
31594	Ying Chin Hsiang No.101	Taiwan	YING SHEN HSIANG FISHERY CO., LTD	0	0	0	0	0	CT7-0564	9230828
31594	Full Always	Taiwan	FU REN OCEAN ENTERPRISE CO., LTD.	0	0	0	0	0	CT6-1103	8648133
31594	Chen Hsing No.1	Taiwan	MAAN CHI FISHERY CO., LTD	0	0	0	0	0	CT6-1278	8648248
31594	Maan Fwu No.188	Taiwan	HER TWAING FISHERY CO., LTD.	0	0	0	0	0	CT6-1485	9820221
31594	Maan Fwu No.666	Taiwan	SHUN HORNG FISHERY CO., LTD.	0	0	0	0	0	CT6-1440	9763825
31594	Maan Fwu No.668	Taiwan	KAO SHENG FISHERY CO., LTD.	0	0	0	0	0	CT6-1353	9176345
31594	Maan Farn No.1	Taiwan	SHU FONG FISHERY CO., LTD	0	0	0	0	0	CT6-1438	9778284
31594	Maan Farn No.168	Taiwan	FONG JAIN FISHERY CO., LTD.	0	0	0	0	0	CT6-1466	9795531
	MSC-F-31341
	Maldives pole & line skipjack tuna	MSC ELIGIBILITY START DATE	MSC ELIGIBILITY END DATE	CLIENT CONTACT:	CERTIFIER CONTACT:
	31 vessels, Estimated 930 crew	2012-11-29	2023-05-28	Maldives Seafood Processors and Exporters Association (MSPEA)	clientservicesie@nsf.org Global Trust
	Notes: 13 vessels not found on RFMO registries = 42%, 7 variation requests, RBF, Variation granted for no site visit in 2022			Shiham Adam mshiham.adam@gmail.com
				Umar Jamal umar@oseafood.com					Reg No	License No																	Port Atoll	Port Island
31341	Kalhirava	Maldives	Not found on IOTC or IPLNF vessel registries	0	1	1	0	0	P8340A-01 10-T	FQ1000212																	GDh	Thinadhoo
31341	Masguraa	Maldives	Not found on IOTC or IPLNF vessel registries	0	1	1	0	0	P9534A-01 02-P	FP0200311																	GA	Vilingili
31341	Maruhabaa	Maldives	Not found on IOTC or IPLNF vessel registries	0	1	1	0	0	P1295B-01 10-T	FT1010611																	K	Male'
31341	Fahiroadhi	Maldives	Not found on IOTC or IPLNF vessel registries	0	1	1	0	0	P9252A-01 06-O	FO0600712																	L	Gan
31341	Fahimagu	Maldives	Not found on IOTC or IPLNF vessel registries	0	1	1	0	0	P8112A-01 02-P	FP0200312																	GA	Vilingili
31341	Fishermen	Maldives	Not found on IOTC or IPLNF vessel registries	0	1	1	0	0	P5747A-01 10-T	FT1008512																	K	Male'
31341	Concord 2	Maldives	Ahmed Saeed IOTC 9113	0	1	1	0	0	P8646A-01 03-S	FS0301011																	S	Maradhoo
31341	Niumath 3	Maldives	Not found on IOTC or IPLNF vessel registries	0	1	1	0	0	P9178A-01 08-M	FM0800212																	Dh	Kudahuvadhoo
31341	Renice	Maldives	Not found on IOTC or IPLNF vessel registries	0	1	1	0	0	P8395A-01 10-T	FQ1000312																	GDh	Thinadhoo
31341	Moahiru	Maldives	Ali Abdul Sathar IOTC 9112	0	1	1	0	0	P9068A-01 03-S	FS0300112																	S	Maradhoo
31341	Dheriyaa	Maldives	Not found on IOTC or IPLNF vessel registries	0	1	1	0	0	P8810A-01 07-Q	FQ0700211																	GDh	Fiyori
31341	Gallery Vision	Maldives	FATHIMATH HASSAN IOTC 9111	0	1	1	0	0	P8278A-01 01-Q	FQ0100211																	GDh	Madaveli
31341	Karavaththaa	Maldives	Not found on IOTC or IPLNF vessel registries	0	1	1	0	0	P8803A-01 02-P	FP0200611																	GA	Vilingili
31341	Fahiroadhi	Maldives	Mohamed Inaan IOTC 9115	0	1	1	0	0	P9337A-01 10-T	FO1300512																	L	Maandhoo
31341	Rasain 3	Maldives	Not found on IOTC or IPLNF vessel registries	0	1	1	0	0	P8752A-01 01-P	FP0100611																	GA	Kolamaafushi
31341	Rahaa	Maldives	ALI ABDULLA IOTC 16815	0	1	1	0	0	P8762A-01 03-S	FS0300512																	S	Maradhoo
31341	Villa Vaali 5	Maldives	Villa Shipping and Trading Company Pvt Ltd IOTC 9105	0	1	1	0	0	C8390A-01 10-T	FO1300412																	L	Maandhoo
31341	Maskuri on here twice	Maldives	NASEEM ISMAI IOTC 9104	0	1	1	0	0	P8148A-01 02-P	FP0200711																	GA	Vilingili
31341	Kandu Roadhi	Maldives	Hussain Ibrahim IOTC 9962	0	1	1	0	0	P5996A-01 10-O	FO1000411																	L	Maamendhoo
31341	Shams	Maldives	Abdul Muhusin Hussain IOTC 9102	0	1	1	0	0	P5955A-01 10-T	FT1010812																	K	Male'
31341	FISHMAN	Maldives	PEARL TRAVEL SERVICE PRIVATE LIMITED IOTC 13273	0	1	1	0	0	C8882A-01 01-R	FR0104011																	Gn	Fuahmulah
31341	Asdhaan	Maldives	SHANEELA HASSAN IOTC 16759	0	1	1	0	0	P5952A-01 10-Q	FQ1000512																	GDh	Thinadhoo
31341	Vision	Maldives	Ibrahim Rasheed IOTC 9100	0	1	1	0	0	P1367B-01 02-U	FU0200112																	AA	Rasdhoo
31341	Villa Vaali 8	Maldives	Not found on IOTC or IPLNF vessel registries	0	1	1	0	0	C7940A-01 10-T	FT1007912																	K	Male'
31341	Maskuri on here twice	Maldives	NASEEM ISMAIL IOTC 9104	0	1	1	0	0	P8016A-01 01-R	FR0100512																	Gn	Fuahmulah
31341	HUDHUMAA	Maldives	Not found on IOTC or IPLNF vessel registries	0	1	1	0	0	P8189A-01 01-R	FR0101012																	Gn	Fuahmulah
31341	OIBAANI	Maldives	ISMAIL ZAHIR IOTC 13299	0	1	1	0	0	P8057A-01 01-P	FP0100112																	GA	Kolamaafushi
31341	Santana	Maldives	Ali Rasheed IOTC 13291	0	1	1	0	0	P8041A-01 06-S	FS0600111																	S	Hulhudhoo
31341	Julie	Maldives	Mohamed Shahidh IOTC 13290	0	1	1	0	0	P8531A-01 06-S	FS0600311																	S	Hulhudhoo
31341	Chekmark	Maldives	Not found on IOTC or IPLNF vessel registries	0	1	1	0	0	P8675A-01 02-S	FS0200312																	S	Hithadhoo
31341	Han'dhuvaree	Maldives	HANDHUVAREE LLP IOTC 17808	0	1	1	0	0	P9362A-01 04-P	FP0400112																	GA	Nilandhoo
31341	Mahinooru	Maldives	Ali Rafeeq IOTC 9096	0	1	1	0	0	P8918A-01 03-S	FS0301111																	S	Maradhoo
	MSC-F-30076
	WPSTA Western and Central Pacific Skipjack and Yellowfin Purse Seine Fishery	MSC ELIGIBILITY START DATE	MSC ELIGIBILITY END DATE	CLIENT CONTACT:	CERTIFIER CONTACT:
	38 vessels, Estimated 1064 crew	2018-06-21	2023-12-20	F.C.F. Fishery Co., Ltd.	SCS Global mscfisheries@scsglobalservices.com
	Notes: 10 vessels not found on WCPFC, Many variations. Vessel owners or operators are named only for 11 vessels in the Scope Extension of 11/2021.
									Reg #	IMO #
30076	Ching Feng NO. 767	Chinese Taipei	SUPREME UNIVERSAL FISHERY CO.,LTD	0	1	0	0	0	CT7-0325	8628547
30076	Ching Feng NO. 787	Chinese Taipei	SUN GLORY FISHERY CO., LTD	0	1	0	0	0	CT8-0048	8628535
30076	Fair Bravo NO. 707	Chinese Taipei	FAIR BRAVO FISHERY CO., LTD	0	1	0	0	0	CT8-0116	9738703
30076	Fair Well NO. 707	Chinese Taipei	FAIR WELL FISHERY CO., LTD	0	1	0	0	0	CT8-0127	8996346
30076	Fong Kuo NO. 688	Chinese Taipei	FONG KUO FISHERY CO., LTD.	0	1	0	0	0	CT8-0151	9764271
30076	Ta Ching NO. 666	Chinese Taipei	EVER GLORY FISHERY CO., LTD.	0	1	0	0	0	CT8-0062	8628559
30076	Viva Fafa NO. 707	Chinese Taipei	VIVA FAFA FISHERY CO.,LTD.	0	1	0	0	0	CT8-0065	9035254
30076	Win Far NO. 618	Chinese Taipei	LONG CHUANG FISHERY CO., LTD	0	1	0	0	0	CT8-0152	9922354
30076	Win Forever NO. 707	Chinese Taipei	WIN FOREVER FISHERY CO., LTD	0	1	0	0	0	CT8-0131	9870862
30076	Win Rich NO. 707	Chinese Taipei	WIN RICH FISHERY CO., LTD	0	1	0	0	0	CT8-0132	9868637
30076	New Fair Discovery NO. 707	Chinese Taipei	FAIR DISCOVERY FISHERY CO.,LTD.	0	1	0	0	0	CT8-0099	9669079
30076	Shun Fa 8	China	ZHEJIANG OCEAN FAMILY CO.,LTD chartered to Kiribati Island Fish, formerly named Shun Fa No 8, Vanuatu which could be on IUU blacklist https://iuu-vessels.org/Vessel/GetVessel/a97df8f2-a54f-4e84-9299-205b3ed2df9b	0	1	0	0	0	FT200086
30076	Xin Shi Ji 111	China	ZHEJIANG OCEAN FAMILY CO.,LTD chartered to Kiribati Island Fish	0	1	0	0	0	FT 200104
30076	Xin Shi Ji 112	China	ZHEJIANG OCEAN FAMILY CO.,LTD chartered to Kiribati Island Fish	0	1	0	0	0	FT 200047
30076	Xiang Fa 8	China	ZHEJIANG OCEAN FAMILY CO.,LTD chartered to Kiribati Island Fish, formerly named HSIANG FA NO.8, Vanuatu which could be on IUU blacklist https://iuu-vessels.org/Vessel/GetVessel/1be91f40-ed8d-41ba-8283-a6a5a7322acd	0	1	0	0	0	FT 200088
30076	Fung Kuo No 188 misspelled and registered as Fong Kuo No 188	Chinese Taipei	FONG KUO FISHERY CO., LTD. No charterer	0	1	0	0	0	CT8-0115
30076	Fung Kuo No 189	Chinese Taipei	FONG KUO FISHERY CO., LTD. No charterer	0	1	0	0	0	CT8-0113
30076	Fung Kuo No 828	Chinese Taipei	FONG KUO FISHERY CO., LTD. No charterer	0	1	0	0	0	CT8-0107
30076	Fung Kuo No 866	Chinese Taipei	FONG KUO FISHERY CO., LTD. No charterer	0	1	0	0	0	CT8-0095
30076	Fung Kuo No 889	Chinese Taipei	FONG KUO FISHERY CO., LTD. No charterer	0	1	0	0	0	CT8-0106
30076	Win Far No. 606	Chinese Taipei	Not found on WCPFC	0	1	0	0	0	CT8-0071
30076	Win Far No. 626	Chinese Taipei	KUO CHANG FISHERY CO.,LTD	0	1	0	0	0	CT8-0039
30076	Win Far No. 636 Murder of observer Eritara Kaierua	Chinese Taipei	KUO CHANG FISHERY CO.,LTD	0	1	0	0	0	CT8-0072
30076	Win Far No. 666	USA	Not found on WCPFC	0	1	0	0	0	1205808
30076	Ocean Warrior	Nauru	OCEAN WARRIOR (NAURU) LIMITED formerly named Ocean Warrior under US flag	0	1	0	0	0	1209712
30076	Ocean Challenger	Nauru	OCEAN CHALLENGER (NAURU) LIMITED formerly named Ocean Challenger flagged to USA	0	1	0	0	0	1202618
30076	Ocean Conquest	Nauru	OCEAN CONQUEST (NAURU) LIMITED formerly named Ocean Conquest USA	0	1	0	0	0	1205812
30076	Ocean Encounter	Nauru	OCEAN ENCOUNTER (Nauru) Limited formerly named Ocean Encounter flagged to USA	0	1	0	0	0	1202619
30076	Ocean Galaxy	Nauru	OCEAN GALAXY (NAURU) LIMITED formerly named Ocean Galaxy flagged to USA	0	1	0	0	0	1214839
30076	Pacific Pride	USA	Not found on WCPFC	0	1	0	0	0	1214250
30076	Pacific Ranger	USA	Not found on WCPFC	0	1	0	0	0	1214248
30076	Sea Bounty	USA	Not found on WCPFC	0	1	0	0	0	1214841
30076	Sea Defender	USA	Not found on WCPFC	0	1	0	0	0	1202621
30076	Sea Quest	USA	Not found on WCPFC	0	1	0	0	0	1203206
30076	Sea Trader	USA	Not found on WCPFC	0	1	0	0	0	1207470
30076	Sea Fox	USA	Not found on WCPFC	0	1	0	0	0	1207469
30076	Sea Honor	USA	Not found on WCPFC	0	1	0	0	0	1210858
	In assessment during research > certified 3 April 2023 > MSC-F-31591
	Katsuo Ippon-zuri Gyogyo albacore and skipjack pole and line fishery	MSC ELIGIBILITY START DATE	MSC ELIGIBILITY END DATE	CLIENT CONTACT:	CERTIFIER CONTACT:
	5 vessels, Estimated 150 crew	2023-08-03	2028-08-02	Katsuo Ippon-zuri Gyogyo Co., Ltd.	Control Union fisheriesuk@controlunion.com
	Notes: 7 jurisdictions? Nauru, Tuvalu, FSM, RMI, Solomon Islands, Japan EEZs and WCPO High Seas			Makoto Suzuki
				makoto.suzuki@fish-support.jp
31591	Asahi Maru No.8	Japan	Katsuo Ippon-zuri Gyogyo Co., Ltd.	1	0	0	0	0
31591	Asahi Maru No. 11	Japan	Katsuo Ippon-zuri Gyogyo Co., Ltd.	1	0	0	0	0
31591	Kiyo Maru No. 18	Japan	Katsuo Ippon-zuri Gyogyo Co., Ltd.	1	0	0	0	0
31591	Kyo Maru No. 28	Japan	Katsuo Ippon-zuri Gyogyo Co., Ltd.	1	0	0	0	0
31591	Kyoyo Maru No. 3	Japan	Katsuo Ippon-zuri Gyogyo Co., Ltd.	1	0	0	0	0
	MSC-F-31475
	Pan Pacific yellowfin, bigeye and albacore longline fishery	MSC ELIGIBILITY START DATE	MSC ELIGIBILITY END DATE	CLIENT CONTACT:	CERTIFIER CONTACT:
	10 vessels, Estimated 150 crew	2020-06-26	2025-12-25	Dongwon Industries	Control Union fisheriesuk@controlunion.com
	Notes: Variance
31475	No. 201 Dongwon	Korea	Dongwon	0	1	0	0	1	22939
31475	No. 203 Dongwon	Korea	Dongwon	0	1	0	0	1	33351
31475	No. 205 Dongwon	Korea	Dongwon	0	1	0	0	1	32920
31475	No. 207 Dongwon	Korea	Dongwon	0	1	0	0	1	32198
31475	No. 208 Dongwon	Korea	Dongwon	0	1	0	0	1	32969
31475	No. 212 Dongwon	Korea	Dongwon	0	1	0	0	1	329964
31475	No. 803 Dongwon	Korea	Dongwon	0	1	0	0	1	18168
31475	Atun Tres	Korea	Dongwon	0	1	0	0	1	32926
31475	No. 3 Tonina	Korea	Dongwon	0	1	0	0	1	24463
31475	No. 5 Tonina	Korea	Dongwon	0	1	0	0	1	32956
	MSC-F-31295
	New Zealand albacore tuna troll	MSC ELIGIBILITY START DATE	MSC ELIGIBILITY END DATE	CLIENT CONTACT:	CERTIFIER CONTACT:
	125 vessels, Estimated 375 crew	2011-05-16	2027-08-15	Tuna Management Association of New Zealand (TMA)	Ylva Longva
	Notes: All NZ permitted vessels trolling for albacore			Doug Loder	Control Union
				doug.loder@talleys.co.nz
31295	Happy V	New Zealand	See vessel owners here: https://www.foodsafety.govt.nz/registers-lists/eu-registered-vessels/index.htm	0	1	1	0	0	1320
31295	Moata	New Zealand	See vessel owners here: https://www.foodsafety.govt.nz/registers-lists/eu-registered-vessels/index.htm	0	1	1	0	0	1552
31295	Jay Penelope	New Zealand	See vessel owners here: https://www.foodsafety.govt.nz/registers-lists/eu-registered-vessels/index.htm	0	1	1	0	0	2062
31295	Kaipara	New Zealand	See vessel owners here: https://www.foodsafety.govt.nz/registers-lists/eu-registered-vessels/index.htm	0	1	1	0	0	2066
31295	Lady Ruth	New Zealand	See vessel owners here: https://www.foodsafety.govt.nz/registers-lists/eu-registered-vessels/index.htm	0	1	1	0	0	2077
31295	Jay Belle	New Zealand	See vessel owners here: https://www.foodsafety.govt.nz/registers-lists/eu-registered-vessels/index.htm	0	1	1	0	0	2095
31295	Jay Elaine	New Zealand	See vessel owners here: https://www.foodsafety.govt.nz/registers-lists/eu-registered-vessels/index.htm	0	1	1	0	0	2100
31295	Scorpio	New Zealand	See vessel owners here: https://www.foodsafety.govt.nz/registers-lists/eu-registered-vessels/index.htm	0	1	1	0	0	2449
31295	Vanguard	New Zealand	See vessel owners here: https://www.foodsafety.govt.nz/registers-lists/eu-registered-vessels/index.htm	0	1	1	0	0	3263
31295	Bonaventure	New Zealand	See vessel owners here: https://www.foodsafety.govt.nz/registers-lists/eu-registered-vessels/index.htm	0	1	1	0	0	4018
31295	Dorothy May	New Zealand	See vessel owners here: https://www.foodsafety.govt.nz/registers-lists/eu-registered-vessels/index.htm	0	1	1	0	0	4049
31295	Thelma G	New Zealand	See vessel owners here: https://www.foodsafety.govt.nz/registers-lists/eu-registered-vessels/index.htm	0	1	1	0	0	4133
31295	Frey	New Zealand	See vessel owners here: https://www.foodsafety.govt.nz/registers-lists/eu-registered-vessels/index.htm	0	1	1	0	0	4355
31295	Oragon	New Zealand	See vessel owners here: https://www.foodsafety.govt.nz/registers-lists/eu-registered-vessels/index.htm	0	1	1	0	0	4666
31295	Seaway	New Zealand	See vessel owners here: https://www.foodsafety.govt.nz/registers-lists/eu-registered-vessels/index.htm	0	1	1	0	0	5668
31295	Corolu	New Zealand	See vessel owners here: https://www.foodsafety.govt.nz/registers-lists/eu-registered-vessels/index.htm	0	1	1	0	0	5931
31295	Rongatea II	New Zealand	See vessel owners here: https://www.foodsafety.govt.nz/registers-lists/eu-registered-vessels/index.htm	0	1	1	0	0	5984
31295	Pearly Shells	New Zealand	See vessel owners here: https://www.foodsafety.govt.nz/registers-lists/eu-registered-vessels/index.htm	0	1	1	0	0	5985
31295	Sharyn	New Zealand	See vessel owners here: https://www.foodsafety.govt.nz/registers-lists/eu-registered-vessels/index.htm	0	1	1	0	0	5996
31295	Tui	New Zealand	See vessel owners here: https://www.foodsafety.govt.nz/registers-lists/eu-registered-vessels/index.htm	0	1	1	0	0	6110
31295	Antares	New Zealand	See vessel owners here: https://www.foodsafety.govt.nz/registers-lists/eu-registered-vessels/index.htm	0	1	1	0	0	6765
31295	Compass Rose	New Zealand	See vessel owners here: https://www.foodsafety.govt.nz/registers-lists/eu-registered-vessels/index.htm	0	1	1	0	0	7214
31295	Tawera	New Zealand	See vessel owners here: https://www.foodsafety.govt.nz/registers-lists/eu-registered-vessels/index.htm	0	1	1	0	0	7315
31295	Expatriate	New Zealand	See vessel owners here: https://www.foodsafety.govt.nz/registers-lists/eu-registered-vessels/index.htm	0	1	1	0	0	7369
31295	Stella Marie	New Zealand	See vessel owners here: https://www.foodsafety.govt.nz/registers-lists/eu-registered-vessels/index.htm	0	1	1	0	0	7420
31295	Oceana	New Zealand	See vessel owners here: https://www.foodsafety.govt.nz/registers-lists/eu-registered-vessels/index.htm	0	1	1	0	0	7556
31295	Lady Jane	New Zealand	See vessel owners here: https://www.foodsafety.govt.nz/registers-lists/eu-registered-vessels/index.htm	0	1	1	0	0	7593
31295	June I	New Zealand	See vessel owners here: https://www.foodsafety.govt.nz/registers-lists/eu-registered-vessels/index.htm	0	1	1	0	0	7600
31295	Trojan	New Zealand	See vessel owners here: https://www.foodsafety.govt.nz/registers-lists/eu-registered-vessels/index.htm	0	1	1	0	0	7908
31295	Sea Fury	New Zealand	See vessel owners here: https://www.foodsafety.govt.nz/registers-lists/eu-registered-vessels/index.htm	0	1	1	0	0	8113
31295	Harvester	New Zealand	See vessel owners here: https://www.foodsafety.govt.nz/registers-lists/eu-registered-vessels/index.htm	0	1	1	0	0	8199
31295	St Ronald	New Zealand	See vessel owners here: https://www.foodsafety.govt.nz/registers-lists/eu-registered-vessels/index.htm	0	1	1	0	0	8230
31295	Caroline	New Zealand	See vessel owners here: https://www.foodsafety.govt.nz/registers-lists/eu-registered-vessels/index.htm	0	1	1	0	0	8235
31295	Marewa	New Zealand	See vessel owners here: https://www.foodsafety.govt.nz/registers-lists/eu-registered-vessels/index.htm	0	1	1	0	0	8260
31295	Marie Ann	New Zealand	See vessel owners here: https://www.foodsafety.govt.nz/registers-lists/eu-registered-vessels/index.htm	0	1	1	0	0	8283
31295	Coaster	New Zealand	See vessel owners here: https://www.foodsafety.govt.nz/registers-lists/eu-registered-vessels/index.htm	0	1	1	0	0	8309
31295	Sea Emerald	New Zealand	See vessel owners here: https://www.foodsafety.govt.nz/registers-lists/eu-registered-vessels/index.htm	0	1	1	0	0	8324
31295	Corinthian	New Zealand	See vessel owners here: https://www.foodsafety.govt.nz/registers-lists/eu-registered-vessels/index.htm	0	1	1	0	0	8644
31295	Savannah	New Zealand	See vessel owners here: https://www.foodsafety.govt.nz/registers-lists/eu-registered-vessels/index.htm	0	1	1	0	0	9035
31295	Giorgina	New Zealand	See vessel owners here: https://www.foodsafety.govt.nz/registers-lists/eu-registered-vessels/index.htm	0	1	1	0	0	9101
31295	Jeanette	New Zealand	See vessel owners here: https://www.foodsafety.govt.nz/registers-lists/eu-registered-vessels/index.htm	0	1	1	0	0	9156
31295	Grace Mary	New Zealand	See vessel owners here: https://www.foodsafety.govt.nz/registers-lists/eu-registered-vessels/index.htm	0	1	1	0	0	9157
31295	Iveagh Bay	New Zealand	See vessel owners here: https://www.foodsafety.govt.nz/registers-lists/eu-registered-vessels/index.htm	0	1	1	0	0	9179
31295	Canopus	New Zealand	See vessel owners here: https://www.foodsafety.govt.nz/registers-lists/eu-registered-vessels/index.htm	0	1	1	0	0	9202
31295	FV Tainui	New Zealand	See vessel owners here: https://www.foodsafety.govt.nz/registers-lists/eu-registered-vessels/index.htm	0	1	1	0	0	9224
31295	Spindrift	New Zealand	See vessel owners here: https://www.foodsafety.govt.nz/registers-lists/eu-registered-vessels/index.htm	0	1	1	0	0	9228
31295	Sea Jay	New Zealand	See vessel owners here: https://www.foodsafety.govt.nz/registers-lists/eu-registered-vessels/index.htm	0	1	1	0	0	9271
31295	Okarito	New Zealand	See vessel owners here: https://www.foodsafety.govt.nz/registers-lists/eu-registered-vessels/index.htm	0	1	1	0	0	9279
31295	Annie	New Zealand	See vessel owners here: https://www.foodsafety.govt.nz/registers-lists/eu-registered-vessels/index.htm	0	1	1	0	0	9280
31295	Moonwalker	New Zealand	See vessel owners here: https://www.foodsafety.govt.nz/registers-lists/eu-registered-vessels/index.htm	0	1	1	0	0	9320
31295	Nimbus	New Zealand	See vessel owners here: https://www.foodsafety.govt.nz/registers-lists/eu-registered-vessels/index.htm	0	1	1	0	0	9357
31295	Quo Vadis	New Zealand	See vessel owners here: https://www.foodsafety.govt.nz/registers-lists/eu-registered-vessels/index.htm	0	1	1	0	0	9679
31295	Trinity I	New Zealand	See vessel owners here: https://www.foodsafety.govt.nz/registers-lists/eu-registered-vessels/index.htm	0	1	1	0	0	10377
31295	Bengal Bank	New Zealand	See vessel owners here: https://www.foodsafety.govt.nz/registers-lists/eu-registered-vessels/index.htm	0	1	1	0	0	10645
31295	Exocet	New Zealand	See vessel owners here: https://www.foodsafety.govt.nz/registers-lists/eu-registered-vessels/index.htm	0	1	1	0	0	10852
31295	Outward Bound II	New Zealand	See vessel owners here: https://www.foodsafety.govt.nz/registers-lists/eu-registered-vessels/index.htm	0	1	1	0	0	11400
31295	Una-Rae	New Zealand	See vessel owners here: https://www.foodsafety.govt.nz/registers-lists/eu-registered-vessels/index.htm	0	1	1	0	0	14217
31295	Chips	New Zealand	See vessel owners here: https://www.foodsafety.govt.nz/registers-lists/eu-registered-vessels/index.htm	0	1	1	0	0	14874
31295	PROGRESS	New Zealand	See vessel owners here: https://www.foodsafety.govt.nz/registers-lists/eu-registered-vessels/index.htm	0	1	1	0	0	15078
31295	Marilee Mac	New Zealand	See vessel owners here: https://www.foodsafety.govt.nz/registers-lists/eu-registered-vessels/index.htm	0	1	1	0	0	15091
31295	Ana	New Zealand	See vessel owners here: https://www.foodsafety.govt.nz/registers-lists/eu-registered-vessels/index.htm	0	1	1	0	0	15527
31295	Kilin	New Zealand	See vessel owners here: https://www.foodsafety.govt.nz/registers-lists/eu-registered-vessels/index.htm	0	1	1	0	0	15589
31295	Asta Maru	New Zealand	See vessel owners here: https://www.foodsafety.govt.nz/registers-lists/eu-registered-vessels/index.htm	0	1	1	0	0	16114
31295	Garraway	New Zealand	See vessel owners here: https://www.foodsafety.govt.nz/registers-lists/eu-registered-vessels/index.htm	0	1	1	0	0	32068
31295	Rattle Me	New Zealand	See vessel owners here: https://www.foodsafety.govt.nz/registers-lists/eu-registered-vessels/index.htm	0	1	1	0	0	32224
31295	Alice Dell	New Zealand	See vessel owners here: https://www.foodsafety.govt.nz/registers-lists/eu-registered-vessels/index.htm	0	1	1	0	0	32864
31295	Genesis IV	New Zealand	See vessel owners here: https://www.foodsafety.govt.nz/registers-lists/eu-registered-vessels/index.htm	0	1	1	0	0	44220
31295	Redemption	New Zealand	See vessel owners here: https://www.foodsafety.govt.nz/registers-lists/eu-registered-vessels/index.htm	0	1	1	0	0	44552
31295	Medea	New Zealand	See vessel owners here: https://www.foodsafety.govt.nz/registers-lists/eu-registered-vessels/index.htm	0	1	1	0	0	56187
31295	Prospector	New Zealand	See vessel owners here: https://www.foodsafety.govt.nz/registers-lists/eu-registered-vessels/index.htm	0	1	1	0	0	62128
31295	Hinewai	New Zealand	See vessel owners here: https://www.foodsafety.govt.nz/registers-lists/eu-registered-vessels/index.htm	0	1	1	0	0	62291
31295	Tenacity	New Zealand	See vessel owners here: https://www.foodsafety.govt.nz/registers-lists/eu-registered-vessels/index.htm	0	1	1	0	0	62437
31295	Pursuit II	New Zealand	See vessel owners here: https://www.foodsafety.govt.nz/registers-lists/eu-registered-vessels/index.htm	0	1	1	0	0	62649
31295	Emma J	New Zealand	See vessel owners here: https://www.foodsafety.govt.nz/registers-lists/eu-registered-vessels/index.htm	0	1	1	0	0	62736
31295	Natalie J	New Zealand	See vessel owners here: https://www.foodsafety.govt.nz/registers-lists/eu-registered-vessels/index.htm	0	1	1	0	0	62755
31295	Triton	New Zealand	See vessel owners here: https://www.foodsafety.govt.nz/registers-lists/eu-registered-vessels/index.htm	0	1	1	0	0	62899
31295	Kathleen G	New Zealand	See vessel owners here: https://www.foodsafety.govt.nz/registers-lists/eu-registered-vessels/index.htm	0	1	1	0	0	62926
31295	Too Extreme	New Zealand	See vessel owners here: https://www.foodsafety.govt.nz/registers-lists/eu-registered-vessels/index.htm	0	1	1	0	0	63064
31295	Te Awa	New Zealand	See vessel owners here: https://www.foodsafety.govt.nz/registers-lists/eu-registered-vessels/index.htm	0	1	1	0	0	63253
31295	Rose Croix	New Zealand	See vessel owners here: https://www.foodsafety.govt.nz/registers-lists/eu-registered-vessels/index.htm	0	1	1	0	0	63367
31295	Latitude	New Zealand	See vessel owners here: https://www.foodsafety.govt.nz/registers-lists/eu-registered-vessels/index.htm	0	1	1	0	0	63783
31295	Western Leader	New Zealand	See vessel owners here: https://www.foodsafety.govt.nz/registers-lists/eu-registered-vessels/index.htm	0	1	1	0	0	64005
31295	Aquatic Mist	New Zealand	See vessel owners here: https://www.foodsafety.govt.nz/registers-lists/eu-registered-vessels/index.htm	0	1	1	0	0	64038
31295	Santa Maria	New Zealand	See vessel owners here: https://www.foodsafety.govt.nz/registers-lists/eu-registered-vessels/index.htm	0	1	1	0	0	64058
31295	Perseverance	New Zealand	See vessel owners here: https://www.foodsafety.govt.nz/registers-lists/eu-registered-vessels/index.htm	0	1	1	0	0	66110
31295	Koru II	New Zealand	See vessel owners here: https://www.foodsafety.govt.nz/registers-lists/eu-registered-vessels/index.htm	0	1	1	0	0	66139
31295	Arapawa III	New Zealand	See vessel owners here: https://www.foodsafety.govt.nz/registers-lists/eu-registered-vessels/index.htm	0	1	1	0	0	66149
31295	Te Aroha	New Zealand	See vessel owners here: https://www.foodsafety.govt.nz/registers-lists/eu-registered-vessels/index.htm	0	1	1	0	0	70547
31295	Charisma 11	New Zealand	See vessel owners here: https://www.foodsafety.govt.nz/registers-lists/eu-registered-vessels/index.htm	0	1	1	0	0	86021
31295	Fifty South	New Zealand	See vessel owners here: https://www.foodsafety.govt.nz/registers-lists/eu-registered-vessels/index.htm	0	1	1	0	0	86055
31295	Predator	New Zealand	See vessel owners here: https://www.foodsafety.govt.nz/registers-lists/eu-registered-vessels/index.htm	0	1	1	0	0	90039
31295	Fellowship	New Zealand	See vessel owners here: https://www.foodsafety.govt.nz/registers-lists/eu-registered-vessels/index.htm	0	1	1	0	0	96115
31295	Tempest	New Zealand	See vessel owners here: https://www.foodsafety.govt.nz/registers-lists/eu-registered-vessels/index.htm	0	1	1	0	0	96127
31295	DevOcean	New Zealand	See vessel owners here: https://www.foodsafety.govt.nz/registers-lists/eu-registered-vessels/index.htm	0	1	1	0	0	900400
31295	Karin	New Zealand	See vessel owners here: https://www.foodsafety.govt.nz/registers-lists/eu-registered-vessels/index.htm	0	1	1	0	0	900538
31295	Patriarch	New Zealand	See vessel owners here: https://www.foodsafety.govt.nz/registers-lists/eu-registered-vessels/index.htm	0	1	1	0	0	900656
31295	Munida	New Zealand	See vessel owners here: https://www.foodsafety.govt.nz/registers-lists/eu-registered-vessels/index.htm	0	1	1	0	0	900802
31295	Ichi	New Zealand	See vessel owners here: https://www.foodsafety.govt.nz/registers-lists/eu-registered-vessels/index.htm	0	1	1	0	0	900828
31295	Ocean Odyssey	New Zealand	See vessel owners here: https://www.foodsafety.govt.nz/registers-lists/eu-registered-vessels/index.htm	0	1	1	0	0	900914
31295	Pandora	New Zealand	See vessel owners here: https://www.foodsafety.govt.nz/registers-lists/eu-registered-vessels/index.htm	0	1	1	0	0	900945
31295	Tigerzeye	New Zealand	See vessel owners here: https://www.foodsafety.govt.nz/registers-lists/eu-registered-vessels/index.htm	0	1	1	0	0	900966
31295	Teepookana	New Zealand	See vessel owners here: https://www.foodsafety.govt.nz/registers-lists/eu-registered-vessels/index.htm	0	1	1	0	0	900986
31295	El Mama	New Zealand	See vessel owners here: https://www.foodsafety.govt.nz/registers-lists/eu-registered-vessels/index.htm	0	1	1	0	0	901029
31295	Amazon	New Zealand	See vessel owners here: https://www.foodsafety.govt.nz/registers-lists/eu-registered-vessels/index.htm	0	1	1	0	0	901080
31295	Magus	New Zealand	See vessel owners here: https://www.foodsafety.govt.nz/registers-lists/eu-registered-vessels/index.htm	0	1	1	0	0	901128
31295	Stella	New Zealand	See vessel owners here: https://www.foodsafety.govt.nz/registers-lists/eu-registered-vessels/index.htm	0	1	1	0	0	901129
31295	Brid Voyager	New Zealand	See vessel owners here: https://www.foodsafety.govt.nz/registers-lists/eu-registered-vessels/index.htm	0	1	1	0	0	901204
31295	Frances	New Zealand	See vessel owners here: https://www.foodsafety.govt.nz/registers-lists/eu-registered-vessels/index.htm	0	1	1	0	0	901216
31295	N W De-Grey	New Zealand	See vessel owners here: https://www.foodsafety.govt.nz/registers-lists/eu-registered-vessels/index.htm	0	1	1	0	0	901235
31295	Aleatha T	New Zealand	See vessel owners here: https://www.foodsafety.govt.nz/registers-lists/eu-registered-vessels/index.htm	0	1	1	0	0	901283
31295	Sarda	New Zealand	See vessel owners here: https://www.foodsafety.govt.nz/registers-lists/eu-registered-vessels/index.htm	0	1	1	0	0	901293
31295	Sapphire Bay	New Zealand	See vessel owners here: https://www.foodsafety.govt.nz/registers-lists/eu-registered-vessels/index.htm	0	1	1	0	0	901309
31295	Catherine II	New Zealand	See vessel owners here: https://www.foodsafety.govt.nz/registers-lists/eu-registered-vessels/index.htm	0	1	1	0	0	901331
31295	Bigeye	New Zealand	See vessel owners here: https://www.foodsafety.govt.nz/registers-lists/eu-registered-vessels/index.htm	0	1	1	0	0	901337
31295	Carolina M	New Zealand	See vessel owners here: https://www.foodsafety.govt.nz/registers-lists/eu-registered-vessels/index.htm	0	1	1	0	0	901341
31295	Southern Pride	New Zealand	See vessel owners here: https://www.foodsafety.govt.nz/registers-lists/eu-registered-vessels/index.htm	0	1	1	0	0	901372
31295	NOR'WEST CLOUD	New Zealand	See vessel owners here: https://www.foodsafety.govt.nz/registers-lists/eu-registered-vessels/index.htm	0	1	1	0	0	901378
31295	Sea Dragon	New Zealand	See vessel owners here: https://www.foodsafety.govt.nz/registers-lists/eu-registered-vessels/index.htm	0	1	1	0	0	901385
31295	Sidina	New Zealand	See vessel owners here: https://www.foodsafety.govt.nz/registers-lists/eu-registered-vessels/index.htm	0	1	1	0	0	901400
31295	Macy Gray	New Zealand	See vessel owners here: https://www.foodsafety.govt.nz/registers-lists/eu-registered-vessels/index.htm	0	1	1	0	0	901403
31295	PROVIDER	New Zealand	See vessel owners here: https://www.foodsafety.govt.nz/registers-lists/eu-registered-vessels/index.htm	0	1	1	0	0	901434
31295	Lady Ash	New Zealand	See vessel owners here: https://www.foodsafety.govt.nz/registers-lists/eu-registered-vessels/index.htm	0	1	1	0	0	901438
31295	Mistress	New Zealand	See vessel owners here: https://www.foodsafety.govt.nz/registers-lists/eu-registered-vessels/index.htm	0	1	1	0	0	901455
	In assessment
	Pacific and Indian Ocean longline tuna and swordfish fishery	MSC ELIGIBILITY START DATE	MSC ELIGIBILITY END DATE	CLIENT CONTACT:	CERTIFIER CONTACT:
	19 vessels, 19 vessels not found on WCPFC			Zhejiang Ocean Family Co., Ltd.	mscfisheries@scsglobalservices.com
	Estimated 285 crew			Xiaobing Li xiaobing.liu@hotmail.com
	Notes: IATTC, 6 different oceans! Variation request			http://www.zheyu.cn/en/about_n.asp
	Xinshiji 37	China	Zhejiang Ocean Family Co., Ltd.	1	0	0	0	0
	Xinshiji 72	China	Zhejiang Ocean Family Co., Ltd.	1	0	0	0	0
	Xinshiji 76	China	Zhejiang Ocean Family Co., Ltd.	1	0	0	0	0
	Xinshiji 81	China	Zhejiang Ocean Family Co., Ltd.	1	0	0	0	0
	Xinshiji 82	China	Zhejiang Ocean Family Co., Ltd.	1	0	0	0	0
	Xinshiji 83	China	Zhejiang Ocean Family Co., Ltd.	1	0	0	0	0
	Xinshiji 85	China	Zhejiang Ocean Family Co., Ltd.	1	0	0	0	0
	Xinshiji 86	China	Zhejiang Ocean Family Co., Ltd.	1	0	0	0	0
	Xinshiji 62	China	Zhejiang Ocean Family Co., Ltd.	1	0	0	0	0	18113
	Xinshiji 65	China	Zhejiang Ocean Family Co., Ltd.	1	0	0	0	0	17228																300
	Xinshiji 66	China	Zhejiang Ocean Family Co., Ltd.	1	0	0	0	0	17229
	Xinshiji 70	China	Zhejiang Ocean Family Co., Ltd.	1	0	0	0	0	13759																300
	Xinshiji 71	China	Zhejiang Ocean Family Co., Ltd.	1	0	0	0	0	13760
	Xinshiji 73	China	Zhejiang Ocean Family Co., Ltd.	1	0	0	0	0	12488																300
	Xinshiji 75	China	Zhejiang Ocean Family Co., Ltd.	1	0	0	0	0	12489
	Xinshiji 77	China	Zhejiang Ocean Family Co., Ltd.	1	0	0	0	0	13763																280
	Xinshiji 78	China	Zhejiang Ocean Family Co., Ltd.	1	0	0	0	0	12490
	Xinshiji 79	China	Zhejiang Ocean Family Co., Ltd.	1	0	0	0	0	13764																280
	Xinshiji 80	China	Zhejiang Ocean Family Co., Ltd.	1	0	0	0	0	14664
																									280
	MSC-F-31459																								280
	Usufuku Honten Northeast Atlantic longline bluefin tuna fishery	MSC ELIGIBILITY START DATE	MSC ELIGIBILITY END DATE	CLIENT CONTACT:	CERTIFIER CONTACT:
	1 vessel, Estimated 15 crew	2020-08-10	2026-02-09	Usufuku Honten	Control Union fisheriesuk@controlunion.com																				280
	Notes: 3 variation requests. Variations granted to approve use of aggregated fleet-level data on stock mixing as a proxy insead of the single-vessel UoA--could this up the volume and make it impossible to discern overfishing?
																									280
31459	Shofuku Maru N°1		Usufuku Honten Co. Ltd	1	1	1	0	1	7KFY LOA
																									280
	In assessment during research > certified 22 June 2023 > MSC-F-31601
	TTKV WCPO skipjack and yellowfin tuna purse seine fishery	MSC ELIGIBILITY START DATE	MSC ELIGIBILITY END DATE	CLIENT CONTACT:	CERTIFIER CONTACT:
	19 vessels, Estimated 532 crew	2023-06-22	2028-06-21	Itochu Corporation	SCS mscfisheries@scsglobalservices.com
	Notes: Began in 2022			Mori Masato mori-mas@itochu.co.jp
31601	JIH YU NO.168	Chinese Taipei	CHERN LUNG FISHERY CO., LTD.	1	0	0	0	0	CT8-0118	9794745
31601	JIH YU NO.568	Chinese Taipei	JIH YU FISHERY CO., LTD.	1	0	0	0	0	CT8-0158	9923645
31601	JIH YU NO.668	Chinese Taipei	JIH YU FISHERY CO., LTD.	1	0	0	0	0	CT8-0100	9732876
31601	JIH YU NO.768	Chinese Taipei	JIH YU FISHERY CO., LTD.	1	0	0	0	0	CT8-0117	9765976
31601	JIH YU NO.868	Chinese Taipei	CHERN LUNG FISHERY CO., LTD.	1	0	0	0	0	CT8-0119	9781542
31601	JIH YU NO.968	Chinese Taipei	JIH YU FISHERY CO., LTD.	1	0	0	0	0	CT8-0108	9680164
31601	FAIR WELL NO.707	Chinese Taipei	FAIR WELL FISHERY CO., LTD	1	0	0	0	0	CT8-0127	8996346
31601	FAIR BRAVO NO.707	Chinese Taipei	FAIR BRAVO FISHERY CO., LTD	1	0	0	0	0	CT8-0116	9738703
31601	NEW FAIR DISCOVERY NO.707	Chinese Taipei	FAIR DISCOVERY FISHERY CO.,LTD.	1	0	0	0	0	CT8-0099	9669079
31601	WIN RICH NO.707	Chinese Taipei	WIN RICH FISHERY CO., LTD	1	0	0	0	0	CT8-0132	9868637
31601	WIN FOREVER NO.707	Chinese Taipei	WIN FOREVER FISHERY CO., LTD	1	0	0	0	0	CT8-0131	9870862
31601	VIVA FAFA NO.707	Chinese Taipei	VIVA FAFA FISHERY CO.,LTD.	1	0	0	0	0	CT8-0065	9035254
31601	QUEEN ELLICE	Tuvalu	Q.T.I.	1	0	0	0	0	37850920	8648494
31601	TAINA	Tuvalu	TUSA FISHING COMPANY LTD	1	0	0	0	0	34128217	8102921
31601	MAMAUTARI	Kiribati	KIRIBATI & SAJO FISHERIES CO.LTD.	1	0	0	0	0	K-17811366	8003278
31601	MARIRAOI	Kiribati	KIRIBATI & SAJO FISHERIES CO. LTD.	1	0	0	0	0	K-14801164	8003230
31601	MARORAOI	Kiribati	KIRIBATI & SAJO FISHERIES CO. LTD.	1	0	0	0	0	K-17811354	8103080
31601	SERENA 1	Vanuatu	SAJO VANUATU LTD	1	0	0	0	0	1215	9220299
31601	SERENA 2	Vanuatu	SAJO VANUATU LTD	1	0	0	0	0	1540	8996102
	Vessels:	FLAG STATE	VESSEL OPERATOR
																									1484
	MSC-F-31498																								1706
	Indonesia pole-and-line and handline, skipjack and yellowfin tuna of Western and Central Pacific archipelagic waters	MSC ELIGIBILITY START DATE	MSC ELIGIBILITY END DATE	CLIENT CONTACT:	CERTIFIER CONTACT:																				1467
	920 vessels (918 on opening tables), Estimated 27600 crew	2021-01-26	2026-01-25	Asosiasi Perikanan Pole & Line Dan Handline Indonesia (AP2HI)	Global Trust clientservicesie@nsf.org																				1484
	Notes: All vessel owners are named - yay Indonesia!																								1484
	Asosiasi Perikanan Pole & Line Dan Handline Indonesia (AP2HI)																								1428
																									1288
31498	GLORY 18	Indonesia	PT. Marina Nusantara Selaras	1	1	1	1	1	35.21.7198.5223.00115																1288
31498	GLORY 27	Indonesia	PT. Marina Nusantara Selaras	1	1	1	1	1	26.20.7198.5223.00396																1280
31498	BERKAT RIZKY	Indonesia	PT. Marina Nusantara Selaras	1	1	1	1	1	45.21.7198.613.00071																1668
31498	MELATI 09	Indonesia	PT. Marina Nusantara Selaras	1	1	1	1	1	26.20.7198.5223.00002																1818
31498	MELATI 18	Indonesia	PT. Marina Nusantara Selaras	1	1	1	1	1	26.20.7198.5223.00520																1735
31498	MELATI 27	Indonesia	PT. Marina Nusantara Selaras	1	1	1	1	1	26.20.7198.5223.00507																1738
31498	MELATI 36	Indonesia	PT. Marina Nusantara Selaras	1	1	1	1	1	26.20.7198.5223.00627																1617
31498	ALBAKOR	Indonesia	PT. Marina Nusantara Selaras	1	1	1	1	1	45.21.7198.613.00061																1526
31498	SATUHUK 01	Indonesia	PT. Marina Nusantara Selaras	1	1	1	1	1	35.21.7198.5223.00012																1526
31498	MEKA STAR	Indonesia	PT. Marina Nusantara Selaras	1	1	1	1	1	35.21.7198.5223.00226																1102
31498	ADI 2	Indonesia	PT. Intimas Surya	1	1	1	1	1	0150//BPKP-LHP-PU/GP.VI/XI/2019																2031
31498	ARIEL	Indonesia	PT. Intimas Surya	1	1	1	1	1	0157//BPKP-LHP-PU/GP.VI/XI/2019																2386
31498	NUR	Indonesia	PT. Intimas Surya	1	1	1	1	1	0176//BPKP-LHP-PU/GP.VI/XI/2019
31498	JATI INDAH 5	Indonesia	PT. Intimas Surya	1	1	1	1	1	0170//BPKP-LHP-PU/GP.VI/XI/2019
31498	JATI INDAH 6	Indonesia	PT. Intimas Surya	1	1	1	1	1	0166//BPKP-LHP-PU/GP.VI/XI/2019
31498	BINTANG LIMA	Indonesia	PT. Intimas Surya	1	1	1	1	1	0152//BPKP-LHP-PU/GP.VI/XI/2019
31498	RAMA	Indonesia	PT. Intimas Surya	1	1	1	1	1	0110//BPKP-LHP-PU/GP.VI/XI/2019
31498	ALFIN	Indonesia	PT. Intimas Surya	1	1	1	1	1	0109//BPKP-LHP-PU/GP.VI/XI/2019
31498	INDAH JAYA	Indonesia	PT. Intimas Surya	1	1	1	1	1	0141//BPKP-LHP-PU/GP.VI/XI/2019
31498	JADE	Indonesia	PT. Chen Woo Fishery	1	1	1	1	1	35.21.7198.5223.00164
31498	NOAH (REINER)	Indonesia	PT. Chen Woo Fishery	1	1	1	1	1	26.20.7198.5223.00558
31498	YEHUDA	Indonesia	PT. Chen Woo Fishery	1	1	1	1	1	26.20.7198.5223.00486
31498	PELANGI	Indonesia	PT. Chen Woo Fishery	1	1	1	1	1	26.20.7198.5223.00397
31498	ANUGERAH BAHARI 18	Indonesia	PT. Chen Woo Fishery	1	1	1	1	1	523/DISPERIK/BPKP/180/IX-2020
31498	SINAR BERKAT	Indonesia	PT. Chen Woo Fishery	1	1	1	1	1	26.20.7198.5223.00366
31498	ANUGERAH ALAM	Indonesia	PT. Chen Woo Fishery	1	1	1	1	1	26.20.7198.5223.00455
31498	METRO JAYA 09	Indonesia	PT. Chen Woo Fishery	1	1	1	1	1	26.19.7198.5223.00480
31498	BINTANG RIZKY 02	Indonesia	PT. Chen Woo Fishery	1	1	1	1	1	523/DISPERIK/BPKP/76/V-2021
31498	BERKAT RIZKY 04	Indonesia	PT. Chen Woo Fishery	1	1	1	1	1	523/DISPERIK/BPKP/27/II-2021
31498	VENETIAN	Indonesia	PT. Chen Woo Fishery	1	1	1	1	1	45.20.7198.613.00108
31498	ANUGERAH BAHARI	Indonesia	PT. Chen Woo Fishery	1	1	1	1	1	523/DISPERIK/BPKP/86/V-2021
31498	BURUNG LAUT 03	Indonesia	PT. Chen Woo Fishery	1	1	1	1	1	26.20.7198.5223.00538
31498	SELAT LEMBEH	Indonesia	PT. Chen Woo Fishery	1	1	1	1	1	26.20.7198.5223.00705
31498	TUNA RIZKY	Indonesia	PT. Chen Woo Fishery	1	1	1	1	1	45.21.7198.613.00043
31498	SEFINA	Indonesia	PT. Chen Woo Fishery	1	1	1	1	1	26.20.7198.5223.00226
31498	SUMBER BERKAT (DOLFINA)	Indonesia	PT. Chen Woo Fishery	1	1	1	1	1	523/DISPERIK/BPKP/119/VI-2021
31498	CAREN STAR	Indonesia	PT. Chen Woo Fishery	1	1	1	1	1	26.20.7198.5223.00614
31498	NUTRINDO PM 10	Indonesia	PT. Nutrindo Fresfood Internasional	1	1	1	1	1	26.16.000.1.54.52305
31498	NUTRINDO PM 9	Indonesia	PT. Nutrindo Fresfood Internasional	1	1	1	1	1	27.21.0001.55.00557
31498	TARSIUS PM 24	Indonesia	PT. Nutrindo Fresfood Internasional	1	1	1	1	1	26.20.7198.5223.00231
31498	TUNA PASIFIK 015	Indonesia	PT. Kelola Mina Samudra	1	1	1	1	1	45.20.8207.56.00078
31498	TUNA PASIFIK 017	Indonesia	PT. Kelola Mina Samudra	1	1	1	1	1	45.20.8207.56.00074
31498	TUNA PASIFIK 056	Indonesia	PT. Kelola Mina Samudra	1	1	1	1	1	45.20.8207.56.00039
31498	TUNA PASIFIK 060	Indonesia	PT. Kelola Mina Samudra	1	1	1	1	1	45.20.8207.56.00043
31498	TUNA PASIFIK 073	Indonesia	PT. Kelola Mina Samudra	1	1	1	1	1	45.20.8207.56.00056
31498	TUNA PASIFIK 066	Indonesia	PT. Kelola Mina Samudra	1	1	1	1	1	45.20.8207.56.00049
31498	TUNA PASIFIK 086	Indonesia	PT. Kelola Mina Samudra	1	1	1	1	1	45.20.8207.56.00069
31498	TUNA PASIFIK 058	Indonesia	PT. Kelola Mina Samudra	1	1	1	1	1	45.20.8207.56.00041
31498	TUNA PASIFIK 083	Indonesia	PT. Kelola Mina Samudra	1	1	1	1	1	45.20.8207.56.00066
31498	TUNA PASIFIK 089	Indonesia	PT. Kelola Mina Samudra	1	1	1	1	1	45.20.8207.56.00072
31498	TUNA PASIFIK 084	Indonesia	PT. Kelola Mina Samudra	1	1	1	1	1	45.20.8207.56.00067
31498	TUNA PASIFIK 057	Indonesia	PT. Kelola Mina Samudra	1	1	1	1	1	45.20.8207.56.00040
31498	TUNA PASIFIK 059	Indonesia	PT. Kelola Mina Samudra	1	1	1	1	1	45.20.8207.56.00042
31498	TUNA PASIFIK 025	Indonesia	PT. Kelola Mina Samudra	1	1	1	1	1	45.20.8207.56.00075
31498	TUNA PASIFIK 061	Indonesia	PT. Kelola Mina Samudra	1	1	1	1	1	45.20.8207.56.00044
31498	TUNA PASIFIK 065	Indonesia	PT. Kelola Mina Samudra	1	1	1	1	1	45.20.8207.56.00048
31498	TUNA PASIFIK 076	Indonesia	PT. Kelola Mina Samudra	1	1	1	1	1	45.20.8207.56.00059
31498	TUNA PASIFIK 068	Indonesia	PT. Kelola Mina Samudra	1	1	1	1	1	45.20.8207.56.00051
31498	TUNA PASIFIK 067	Indonesia	PT. Kelola Mina Samudra	1	1	1	1	1	45.20.8207.56.00050
31498	TUNA PASIFIK 030	Indonesia	PT. Kelola Mina Samudra	1	1	1	1	1	45.20.8207.56.00076
31498	TUNA PASIFIK 088	Indonesia	PT. Kelola Mina Samudra	1	1	1	1	1	45.20.8207.56.00071
31498	TUNA PASIFIK 087	Indonesia	PT. Kelola Mina Samudra	1	1	1	1	1	45.20.8207.56.00070
31498	TUNA PASIFIK 021	Indonesia	PT. Kelola Mina Samudra	1	1	1	1	1	45.20.8207.56.00073
31498	TUNA PASIFIK 082	Indonesia	PT. Kelola Mina Samudra	1	1	1	1	1	45.20.8207.56.00065
31498	TUNA PASIFIK 081	Indonesia	PT. Kelola Mina Samudra	1	1	1	1	1	45.20.8207.56.00064
31498	TUNA PASIFIK 080	Indonesia	PT. Kelola Mina Samudra	1	1	1	1	1	45.20.8207.56.00063
31498	TUNA PASIFIK 079	Indonesia	PT. Kelola Mina Samudra	1	1	1	1	1	45.20.8207.56.00062
31498	TUNA PASIFIK 077	Indonesia	PT. Kelola Mina Samudra	1	1	1	1	1	45.20.8207.56.00060
31498	TUNA PASIFIK 071	Indonesia	PT. Kelola Mina Samudra	1	1	1	1	1	45.20.8207.56.00054
31498	TUNA PASIFIK 085	Indonesia	PT. Kelola Mina Samudra	1	1	1	1	1	45.20.8207.56.00068
31498	TUNA PASIFIK 072	Indonesia	PT. Kelola Mina Samudra	1	1	1	1	1	45.20.8207.56.00055
31498	TUNA PASIFIK 070	Indonesia	PT. Kelola Mina Samudra	1	1	1	1	1	45.20.8207.56.00053
31498	TUNA PASIFIK 064	Indonesia	PT. Kelola Mina Samudra	1	1	1	1	1	45.20.8207.56.00047
31498	TUNA PASIFIK 063	Indonesia	PT. Kelola Mina Samudra	1	1	1	1	1	45.20.8207.56.00046
31498	TUNA PASIFIK 062	Indonesia	PT. Kelola Mina Samudra	1	1	1	1	1	45.20.8207.56.00045
31498	TUNA PASIFIK 075	Indonesia	PT. Kelola Mina Samudra	1	1	1	1	1	45.20.8207.56.00058
31498	1 PUTRI	Indonesia	PT. Harta Samudra	1	1	1	1	1	45.20.8207.56.00001
31498	ARUL 01	Indonesia	PT. Harta Samudra	1	1	1	1	1	45.20.8207.56.00014
31498	BUNGA DESA BD 02	Indonesia	PT. Harta Samudra	1	1	1	1	1	45.19.8207.56.00011
31498	ERIN 01	Indonesia	PT. Harta Samudra	1	1	1	1	1	45.19.8207.56.00016
31498	FADLI LOTAR	Indonesia	PT. Harta Samudra	1	1	1	1	1	45.20.8207.56.00021
31498	FIKA O2	Indonesia	PT. Harta Samudra	1	1	1	1	1	45.20.8207.56.00016
31498	LION FISH 01	Indonesia	PT. Harta Samudra	1	1	1	1	1	45.20.8207.56.00009
31498	LION FISH 02	Indonesia	PT. Harta Samudra	1	1	1	1	1	45.20.8207.56.00010
31498	LION FISH 03	Indonesia	PT. Harta Samudra	1	1	1	1	1	45.20.8207.56.00011
31498	PASIFIK STAR	Indonesia	PT. Harta Samudra	1	1	1	1	1	45.20.8207.56.00003
31498	SANGOWO PASIFIK	Indonesia	PT. Harta Samudra	1	1	1	1	1	45.19.8207.56.00020
31498	SEKI PASIFIK 04	Indonesia	PT. Harta Samudra	1	1	1	1	1	45.19.8207.56.00013
31498	SILVANI	Indonesia	PT. Harta Samudra	1	1	1	1	1	45.19.8207.56.000009
31498	SRI ALFAN	Indonesia	PT. Harta Samudra	1	1	1	1	1	45.20.8207.56.00022
31498	SRI RAHMAT	Indonesia	PT. Harta Samudra	1	1	1	1	1	45.20.8207.56.00020
31498	STAR FAMILY	Indonesia	PT. Harta Samudra	1	1	1	1	1	45.20.8207.56.00023
31498	NURAINI	Indonesia	PT. Harta Samudra	1	1	1	1	1	45.20.8207.56.00017
31498	LAPASI 01	Indonesia	PT. Harta Samudra	1	1	1	1	1	45.20.8207.56.00118
31498	LAPASI 02	Indonesia	PT. Harta Samudra	1	1	1	1	1	45.20.8207.56.00119
31498	LAPASI 03	Indonesia	PT. Harta Samudra	1	1	1	1	1	45.20.8207.56.00120
31498	PUTRI 01	Indonesia	PT. Harta Samudra	1	1	1	1	1	45.20.8207.56.00124
31498	PUTRI 04	Indonesia	PT. Harta Samudra	1	1	1	1	1	45.20.8207.56.00126
31498	TASLIM 01	Indonesia	PT. Harta Samudra	1	1	1	1	1	45.19.8207.56.00008
31498	TANJUNG PINANG	Indonesia	PT. Harta Samudra	1	1	1	1	1	45.20.8207.56.00116
31498	ST 01	Indonesia	PT. Harta Samudra	1	1	1	1	1	45.20.8207.56.00127
31498	PUTRI 03 (SARDI)	Indonesia	PT. Harta Samudra	1	1	1	1	1	45.20.8207.56.00125
31498	ABI	Indonesia	PT. Harta Samudra	1	1	1	1	1	45.20.8207.56.00104
31498	ANDIKA SAU	Indonesia	PT. Harta Samudra	1	1	1	1	1	45.20.8207.56.00101
31498	BULANTIK	Indonesia	PT. Harta Samudra	1	1	1	1	1	45.20.8207.56.00108
31498	RIZAI	Indonesia	PT. Harta Samudra	1	1	1	1	1	45.19.8207.56.00014
31498	ALFAJRI	Indonesia	PT. Harta Samudra	1	1	1	1	1	45.20.8207.56.00110
31498	FADIL 01	Indonesia	PT. Harta Samudra	1	1	1	1	1	45.20.8207.56.00102
31498	FADIL 02	Indonesia	PT. Harta Samudra	1	1	1	1	1	45.20.8207.56.00103
31498	ALGIBRAN	Indonesia	PT. Harta Samudra	1	1	1	1	1	45.20.8207.56.00027
31498	BAHARIA BAHAR	Indonesia	PT. Harta Samudra	1	1	1	1	1	45.19.8207.56.00019
31498	BUNGA DESA BD 01	Indonesia	PT. Harta Samudra	1	1	1	1	1	45.19.8207.56.00012
31498	DENTIMEDOS	Indonesia	PT. Harta Samudra	1	1	1	1	1	45.20.8207.56.00005
31498	DUA PUTRI JS 01	Indonesia	PT. Harta Samudra	1	1	1	1	1	45.20.8207.56.00006
31498	F2 01	Indonesia	PT. Harta Samudra	1	1	1	1	1	45.19.8207.56.000007
31498	FIKA O1	Indonesia	PT. Harta Samudra	1	1	1	1	1	45.20.8207.56.00015
31498	IDAMAN	Indonesia	PT. Harta Samudra	1	1	1	1	1	45.20.8207.56.00002
31498	ITAR	Indonesia	PT. Harta Samudra	1	1	1	1	1	45.20.8207.56.00018
31498	NASA DUA PUTRA	Indonesia	PT. Harta Samudra	1	1	1	1	1	45.20.8207.56.00012
31498	PUTRA TATOR	Indonesia	PT. Harta Samudra	1	1	1	1	1	45.20.8207.56.00007
31498	PUTRI SOPIA	Indonesia	PT. Harta Samudra	1	1	1	1	1	45.20.8207.56.00028
31498	SANGOWO STAR 01	Indonesia	PT. Harta Samudra	1	1	1	1	1	45.19.8207.56.00015
31498	SANGOWO STAR 02	Indonesia	PT. Harta Samudra	1	1	1	1	1	45.19.8207.56.00010
31498	SATU PUTRA NS 01	Indonesia	PT. Harta Samudra	1	1	1	1	1	45.20.8207.56.00026
31498	SEKI PASIFIK 01	Indonesia	PT. Harta Samudra	1	1	1	1	1	45.19.8207.56.00021
31498	YAYAN	Indonesia	PT. Harta Samudra	1	1	1	1	1	45.20.8207.56.00019
31498	BAHTIAR LESANG	Indonesia	PT. Harta Samudra	1	1	1	1	1	45.20.8204.56.00024
31498	CHIKAR JAYA	Indonesia	PT. Harta Samudra	1	1	1	1	1	45.20.8207.56.00123
31498	RAHMAD BALAKUM	Indonesia	PT. Harta Samudra	1	1	1	1	1	45.20.8207.56.00117
31498	LAPASI 04	Indonesia	PT. Harta Samudra	1	1	1	1	1	45.20.8207.56.00121
31498	MUTIARA	Indonesia	PT. Harta Samudra	1	1	1	1	1	45.20.8207.56.00032
31498	KO DULUAN	Indonesia	PT. Harta Samudra	1	1	1	1	1	45.20.8207.56.00032
31498	PUTRI 02	Indonesia	PT. Harta Samudra	1	1	1	1	1	45.20.8207.56.00122
31498	BAKRI NYIMO	Indonesia	PT. Harta Samudra	1	1	1	1	1	45.20.8207.56.00110
31498	ONGEN 01	Indonesia	PT. Harta Samudra	1	1	1	1	1	45.20.8207.56.00031
31498	RUMBI II	Indonesia	PT. Chen Woo Fishery	1	1	1	1	1	26.20.7198.5223.00330
31498	AYURA MANDIRI	Indonesia	PT. Chen Woo Fishery	1	1	1	1	1	26.20.7198.5223.00140
31498	ELSA 02	Indonesia	PT. Marina Nusantara Selaras	1	1	1	1	1	35.21.7198.5223.00318
31498	BAROKAH 27	Indonesia	PT. Marina Nusantara Selaras	1	1	1	1	1	26.20.7198.5223.00628
31498	SALAM BAITULLAH 02	Indonesia	PT. Sumber Rejeki Berkah Lautan Indonesia	1	1	1	1	1	DPMPTSP.523.37/321/PTSP/2020
31498	AB 01	Indonesia	PT. Harta Samudra	1	1	1	1	1	No.PK.205/4/16/UUP.DRB-2021
31498	ARJUNA (RUDI)	Indonesia	PT. Harta Samudra	1	1	1	1	1	45.20.5397.625.01057
31498	RANDI	Indonesia	PT. Harta Samudra	1	1	1	1	1	318/UPTD-KP/KEC. BANDA/2016
31498	PUTRI AKIFA	Indonesia	PT. Harta Samudra	1	1	1	1	1	No.PK.205/4/8/UUP.DRB-2021
31498	ADI	Indonesia	PT. Harta Samudra	1	1	1	1	1	111/UPTD-KP/KEC. BANDA/2016
31498	ALSAF	Indonesia	PT. Harta Samudra	1	1	1	1	1	No.PK.205/2/24/UUP.DRB-2021
31498	HASIM	Indonesia	PT. Harta Samudra	1	1	1	1	1	No.PK.205/3/25/UUP.DRB-2021
31498	TIGA S	Indonesia	PT. Harta Samudra	1	1	1	1	1	No.PK.205/3/2/UUP.DRB-2021
31498	TOTOBE MANIA 05	Indonesia	PT. Harta Samudra	1	1	1	1	1	No.PK.205/5/19/UUP.DRB-2021
31498	NAHISA	Indonesia	PT. Harta Samudra	1	1	1	1	1	No.PK.205/5/05/UUP.DRB-2021
31498	HABIL	Indonesia	PT. Harta Samudra	1	1	1	1	1	No.PK.205/5/11/UUP.DRB-2021
31498	TOTOBE MANIA 01	Indonesia	PT. Harta Samudra	1	1	1	1	1	No.PK.205/5/07/UUP.DRB-2021
31498	UNA	Indonesia	PT. Harta Samudra	1	1	1	1	1	No.PK.205/5/01/UUP.DRB-2021
31498	RIFDAL	Indonesia	PT. Harta Samudra	1	1	1	1	1	No.PK.205/5/16/UUP.DRB-2021
31498	SATU PUTRI	Indonesia	PT. Harta Samudra	1	1	1	1	1	45.20.8207.56.00109
31498	AFDAL	Indonesia	PT. Harta Samudra	1	1	1	1	1	No.PK.205/5/02/UUP.DRB-2021
31498	MAB	Indonesia	PT. Harta Samudra	1	1	1	1	1	523/DISPERIK/BPKP/209/X-2018
31498	PERANCIS 01	Indonesia	PT. Harta Samudra	1	1	1	1	1	No.PK.205/2/2/UUP.DRB-2021
31498	FF 01	Indonesia	PT. Harta Samudra	1	1	1	1	1	No.PK.205/2/3/UUP.DRB-2021
31498	FADIL 03	Indonesia	PT. Harta Samudra	1	1	1	1	1	No.PK.205/2/4/UUP.DRB-2021
31498	JUMADEL MATAGA	Indonesia	PT. Harta Samudra	1	1	1	1	1	No.PK.205/3/8/UUP.DRB-2021
31498	WANDI	Indonesia	PT. Harta Samudra	1	1	1	1	1	No.PK.205/2/15/UUP.DRB-2021
31498	YULIUS	Indonesia	PT. Harta Samudra	1	1	1	1	1	No.PK.205/3/10/UUP.DRB-2021
31498	FF 02	Indonesia	PT. Harta Samudra	1	1	1	1	1	No.PK.205/2/5/UUP.DRB-2021
31498	PENAWAR 01	Indonesia	PT. Harta Samudra	1	1	1	1	1	No.PK.205/2/6/UUP.DRB-2021
31498	MASRI	Indonesia	PT. Harta Samudra	1	1	1	1	1	No.PK.205/3/11/UUP.DRB-2021
31498	BARAKUDA	Indonesia	PT. Harta Samudra	1	1	1	1	1	129/UPTD-KP/KEC. BANDA/2016
31498	DUA PUTRI AMIN	Indonesia	PT. Harta Samudra	1	1	1	1	1	No.PK.205/4/22/UUP.DRB-2021
31498	JIJO	Indonesia	PT. Harta Samudra	1	1	1	1	1	No.PK.205/4/21/UUP.DRB-2021
31498	SIDDIK	Indonesia	PT. Harta Samudra	1	1	1	1	1	No.PK.205/2/21/UUP.DRB-2021
31498	JIFAN	Indonesia	PT. Harta Samudra	1	1	1	1	1	No.PK.205/3/17/UUP.DRB-2021
31498	FATIR	Indonesia	PT. Harta Samudra	1	1	1	1	1	No.PK.205/2/1/UUP.DRB-2021
31498	PUTRI DUA	Indonesia	PT. Harta Samudra	1	1	1	1	1	No.PK.205/2/18/UUP.DRB-2021
31498	DOKU MIRA	Indonesia	PT. Harta Samudra	1	1	1	1	1	No.PK.205/3/14/UUP.DRB-2021
31498	JANDA MUDA	Indonesia	PT. Harta Samudra	1	1	1	1	1	No.PK.205/2/23/UUP.DRB-2021
31498	LINTAS SAMUDRA	Indonesia	PT. Harta Samudra	1	1	1	1	1	523.43/BPKP-MJN/75/VII/2019
31498	DESA SANGOWO	Indonesia	PT. Harta Samudra	1	1	1	1	1	45.19.8207.56.00022
31498	ARSILA 01	Indonesia	PT. Harta Samudra	1	1	1	1	1	45.20.8207.56.00130
31498	JAINAL TAIHU	Indonesia	PT. Harta Samudra	1	1	1	1	1	45.20.8207.56.00112
31498	KUM KUM	Indonesia	PT. Harta Samudra	1	1	1	1	1	45.20.8204.56.00025
31498	MAJIKO PASIFIK	Indonesia	PT. Harta Samudra	1	1	1	1	1	45.19.8207.56.00023
31498	TELUK SAMBIKI	Indonesia	PT. Harta Samudra	1	1	1	1	1	45.20.8207.56.00037
31498	SATU PUTRI AP 01	Indonesia	PT. Harta Samudra	1	1	1	1	1	45.20.8207.56.00109
31498	MIRAJI NYIMO	Indonesia	PT. Harta Samudra	1	1	1	1	1	45.20.8207.56.00115
31498	SAIFUL 01	Indonesia	PT. Harta Samudra	1	1	1	1	1	45.20.8207.56.00113
31498	PUTRA TUNGGAL PT.01	Indonesia	PT. Harta Samudra	1	1	1	1	1	45.19.8207.56.00005
31498	FUAD 04	Indonesia	PT. Harta Samudra	1	1	1	1	1	45.20.8207.56.00107
31498	HIU AB 01	Indonesia	PT. Harta Samudra	1	1	1	1	1	45.20.8207.56.00030
31498	PUTRI ADEL	Indonesia	PT. Harta Samudra	1	1	1	1	1	45.20.8207.56.00112
31498	SATU PUTRI SP 01 (ABJAN)	Indonesia	PT. Harta Samudra	1	1	1	1	1	45.20.8207.56.00038
31498	SPAIN	Indonesia	PT. Harta Samudra	1	1	1	1	1	45.20.8207.56.00004
31498	TUNA PASIFIK	Indonesia	PT. Harta Samudra	1	1	1	1	1	45.20.8207.56.00034
31498	FIRDAUS SARAMBAE	Indonesia	PT. Harta Samudra	1	1	1	1	1	No.PK.205/4/18/UUP.DRB-2021
31498	KORNELES	Indonesia	PT. Harta Samudra	1	1	1	1	1	No.PK.205/4/15/UUP.DRB-2021
31498	ATIM	Indonesia	PT. Harta Samudra	1	1	1	1	1	No.PK.205/4/5/UUP.DRB-2021
31498	ANDIRA	Indonesia	PT. Harta Samudra	1	1	1	1	1	No.PK.205/4/10/UUP.DRB-2021
31498	DIFAN	Indonesia	PT. Harta Samudra	1	1	1	1	1	No.PK.205/4/11/UUP.DRB-2021
31498	FEBI	Indonesia	PT. Harta Samudra	1	1	1	1	1	No.PK.205/4/12/UUP.DRB-2021
31498	FATRA	Indonesia	PT. Harta Samudra	1	1	1	1	1	No.PK.205/3/23/UUP.DRB-2021
31498	SAFRUDIN	Indonesia	PT. Harta Samudra	1	1	1	1	1	No.PK.205/2/25/UUP.DRB-2021
31498	NUR AIRIN	Indonesia	PT. Harta Samudra	1	1	1	1	1	No.PK.205/4/1/UUP.DRB-2021
31498	MORKEN	Indonesia	PT. Harta Samudra	1	1	1	1	1	No.PK.205/3/1/UUP.DRB-2021
31498	SATU LAGI	Indonesia	PT. Harta Samudra	1	1	1	1	1	No.PK.205/4/2/UUP.DRB-2021
31498	DUA PUTRI MANDIRI	Indonesia	PT. Harta Samudra	1	1	1	1	1	No.PK.205/4/3/UUP.DRB-2021
31498	RISANDI	Indonesia	PT. Harta Samudra	1	1	1	1	1	No.PK.205/3/3/UUP.DRB-2021
31498	TOTOBE MANIA 04	Indonesia	PT. Harta Samudra	1	1	1	1	1	No.PK.205/5/08/UUP.DRB-2021
31498	TOTOBE MANIA 02	Indonesia	PT. Harta Samudra	1	1	1	1	1	No.PK.205/5/09/UUP.DRB-2021
31498	AFTAR	Indonesia	PT. Harta Samudra	1	1	1	1	1	No.PK.205/4/25/UUP.DRB-2021
31498	NIPIS MELAMBAI	Indonesia	PT. Harta Samudra	1	1	1	1	1	No.PK.205/5/03/UUP.DRB-2021
31498	JASMIN 01	Indonesia	PT. Harta Samudra	1	1	1	1	1	No.PK.205/5/14/UUP.DRB-2021
31498	TAMAGUNU	Indonesia	PT. Harta Samudra	1	1	1	1	1	No.PK.205/5/21/UUP.DRB-2021
31498	SATU PUTRA 01	Indonesia	PT. Harta Samudra	1	1	1	1	1	No.PK.205/5/20/UUP.DRB-2021
31498	MALIK	Indonesia	PT. Harta Samudra	1	1	1	1	1	No.PK.205/5/15/UUP.DRB-2021
31498	SESIL	Indonesia	PT. Harta Samudra	1	1	1	1	1	No.PK.205/5/12/UUP.DRB-2021
31498	KALISTA	Indonesia	PT. Harta Samudra	1	1	1	1	1	No.PK.205/4/24/UUP.DRB-2021
31498	MASBAN	Indonesia	PT. Harta Samudra	1	1	1	1	1	No.PK.205/3/7/UUP.DRB-2021
31498	SAMSUL	Indonesia	PT. Harta Samudra	1	1	1	1	1	No.PK.205/3/9/UUP.DRB-2021
31498	ARGENTINA 01	Indonesia	PT. Harta Samudra	1	1	1	1	1	No.PK.205/2/7/UUP.DRB-2021
31498	GEMILANG 09	Indonesia	PT. Harta Samudra	1	1	1	1	1	No.PK.205/2/8/UUP.DRB-2021
31498	YELLOWFIN	Indonesia	PT. Harta Samudra	1	1	1	1	1	No.PK.205/2/10/UUP.DRB-2021
31498	AJAM RAFA 01	Indonesia	PT. Harta Samudra	1	1	1	1	1	No.PK.205/3/6/UUP.DRB-2021
31498	AJAM RAFA 02	Indonesia	PT. Harta Samudra	1	1	1	1	1	No.PK.205/4/19/UUP.DRB-2021
31498	Fakir	Indonesia	PT. Harta Samudra	1	1	1	1	1	No.PK.205/4/20/UUP.DRB-2021
31498	LABAKA	Indonesia	PT. Harta Samudra	1	1	1	1	1	No.PK.205/3/22/UUP.DRB-2021
31498	SATU PUTRA	Indonesia	PT. Harta Samudra	1	1	1	1	1	No.PK.205/3/18/UUP.DRB-2021
31498	AIZA	Indonesia	PT. Harta Samudra	1	1	1	1	1	No.PK.205/3/19/UUP.DRB-2021
31498	SINAR PAGI	Indonesia	PT. Harta Samudra	1	1	1	1	1	No.PK.205/3/20/UUP.DRB-2021
31498	ALFIAN	Indonesia	PT. Harta Samudra	1	1	1	1	1	No.PK.205/3/21/UUP.DRB-2021
31498	NAZWA 01	Indonesia	PT. Harta Samudra	1	1	1	1	1	No.PK.205/1/23/UUP.DRB-2021
31498	OSMAN 01	Indonesia	PT. Harta Samudra	1	1	1	1	1	No.PK.205/3/15/UUP.DRB-2021
31498	CHACA	Indonesia	PT. Harta Samudra	1	1	1	1	1	No.PK.205/3/16/UUP.DRB-2021
31498	SIS	Indonesia	PT. Harta Samudra	1	1	1	1	1	No.PK.205/3/12/UUP.DRB-2021
31498	MADOGO	Indonesia	PT. Harta Samudra	1	1	1	1	1	No.PK.205/3/13/UUP.DRB-2021
31498	M ABD GHIFAR	Indonesia	PT. Harta Samudra	1	1	1	1	1	No.PK.205/2/19/UUP.DRB-2021
31498	SILVANI 02	Indonesia	PT. Harta Samudra	1	1	1	1	1	No.PK.205/2/11/UUP.DRB-2021
31498	PUTRA FARHAT	Indonesia	PT. Harta Samudra	1	1	1	1	1	No.PK.205/2/12/UUP.DRB-2021
31498	NAZWA 03	Indonesia	PT. Harta Samudra	1	1	1	1	1	No.PK.205/2/13/UUP.DRB-2021
31498	NAZWA 04	Indonesia	PT. Harta Samudra	1	1	1	1	1	No.PK.205/2/25/UUP.DRB-2021
31498	AL HAFSI	Indonesia	PT. Harta Samudra	1	1	1	1	1	No.PK.205/2/16/UUP.DRB-2021
31498	RUSMAN 01	Indonesia	PT. Harta Samudra	1	1	1	1	1	C.57/BPKP/DKP-PM/XI/2016
31498	ADI 3	Indonesia	PT. Intimas Surya	1	1	1	1	1	0154//BPKP-LHP-PU/GP.VI/XI/2019
31498	ADI 4	Indonesia	PT. Intimas Surya	1	1	1	1	1	0155//BPKP-LHP-PU/GP.VI/XI/2019
31498	ADITYA 1	Indonesia	PT. Intimas Surya	1	1	1	1	1	0156//BPKP-LHP-PU/GP.VI/XI/2019
31498	ALFARIZQI	Indonesia	PT. Intimas Surya	1	1	1	1	1	0125//BPKP-LHP-PU/GP.VI/XI/2019
31498	ALFY	Indonesia	PT. Intimas Surya	1	1	1	1	1	0103/BPKP-LHP-PU/GP.VI/XI/2019
31498	ALL VER	Indonesia	PT. Intimas Surya	1	1	1	1	1	0112//BPKP-LHP-PU/GP.VI/XI/2019
31498	AMELIA 2	Indonesia	PT. Intimas Surya	1	1	1	1	1	0140//BPKP-LHP-PU/GP.VI/XI/2019
31498	ANI 1	Indonesia	PT. Intimas Surya	1	1	1	1	1	0105/BPKP-LHP-PU/GP.VI/XI/2019
31498	BARKA	Indonesia	PT. Intimas Surya	1	1	1	1	1	0097/BPKP-LHP-PU/GP.VI/XI/2019
31498	BAYU 249	Indonesia	PT. Intimas Surya	1	1	1	1	1	0135//BPKP-LHP-PU/GP.VI/XI/2019
31498	BURANG	Indonesia	PT. Intimas Surya	1	1	1	1	1	0145//BPKP-LHP-PU/GP.VI/XI/2019
31498	DAMA	Indonesia	PT. Intimas Surya	1	1	1	1	1	0149//BPKP-LHP-PU/GP.VI/XI/2019
31498	FAJARRAIN 230	Indonesia	PT. Intimas Surya	1	1	1	1	1	0147//BPKP-LHP-PU/GP.VI/XI/2019
31498	FIKI MAS	Indonesia	PT. Intimas Surya	1	1	1	1	1	0128//BPKP-LHP-PU/GP.VI/XI/2019
31498	FIVE R	Indonesia	PT. Intimas Surya	1	1	1	1	1	0114//BPKP-LHP-PU/GP.VI/XI/2019
31498	GALAXY 02	Indonesia	PT. Intimas Surya	1	1	1	1	1	0161//BPKP-LHP-PU/GP.VI/XI/2019
31498	HARAPAN 3	Indonesia	PT. Intimas Surya	1	1	1	1	1	0134//BPKP-LHP-PU/GP.VI/XI/2019
31498	HIKFAR 127	Indonesia	PT. Intimas Surya	1	1	1	1	1	0115//BPKP-LHP-PU/GP.VI/XI/2019
31498	IDUL 25	Indonesia	PT. Intimas Surya	1	1	1	1	1	0100/BPKP-LHP-PU/GP.VI/XI/2019
31498	IMEGA 497	Indonesia	PT. Intimas Surya	1	1	1	1	1	0122//BPKP-LHP-PU/GP.VI/XI/2019
31498	INDANG 9	Indonesia	PT. Intimas Surya	1	1	1	1	1	0165//BPKP-LHP-PU/GP.VI/XI/2019
31498	ITZAMU 1	Indonesia	PT. Intimas Surya	1	1	1	1	1	0116//BPKP-LHP-PU/GP.VI/XI/2019
31498	ITZAMU 2	Indonesia	PT. Intimas Surya	1	1	1	1	1	0117//BPKP-LHP-PU/GP.VI/XI/2019
31498	ITZAMU 3	Indonesia	PT. Intimas Surya	1	1	1	1	1	0118//BPKP-LHP-PU/GP.VI/XI/2019
31498	ITZAMU 4	Indonesia	PT. Intimas Surya	1	1	1	1	1	0119//BPKP-LHP-PU/GP.VI/XI/2019
31498	JESIKA 01	Indonesia	PT. Intimas Surya	1	1	1	1	1	0101/BPKP-LHP-PU/GP.VI/XI/2019
31498	LAWERE 1	Indonesia	PT. Intimas Surya	1	1	1	1	1	0182//BPKP-LHP-PU/GP.VI/XI/2019
31498	LAWERE 2	Indonesia	PT. Intimas Surya	1	1	1	1	1	0183//BPKP-LHP-PU/GP.VI/XI/2019
31498	MAU USAHA	Indonesia	PT. Intimas Surya	1	1	1	1	1	0126//BPKP-LHP-PU/GP.VI/XI/2019
31498	MAWAR 1	Indonesia	PT. Intimas Surya	1	1	1	1	1	0184//BPKP-LHP-PU/GP.VI/XI/2019
31498	MEGA INDAH	Indonesia	PT. Intimas Surya	1	1	1	1	1	0102/BPKP-LHP-PU/GP.VI/XI/2019
31498	MELINDA	Indonesia	PT. Intimas Surya	1	1	1	1	1	0104/BPKP-LHP-PU/GP.VI/XI/2019
31498	MURNI 1	Indonesia	PT. Intimas Surya	1	1	1	1	1	0164//BPKP-LHP-PU/GP.VI/XI/2019
31498	NADHIRA	Indonesia	PT. Intimas Surya	1	1	1	1	1	0129//BPKP-LHP-PU/GP.VI/XI/2019
31498	NAIYA	Indonesia	PT. Intimas Surya	1	1	1	1	1	0130//BPKP-LHP-PU/GP.VI/XI/2019
31498	NENGSI	Indonesia	PT. Intimas Surya	1	1	1	1	1	0132//BPKP-LHP-PU/GP.VI/XI/2019
31498	NIA	Indonesia	PT. Intimas Surya	1	1	1	1	1	0124//BPKP-LHP-PU/GP.VI/XI/2019
31498	NIRMALA SARI	Indonesia	PT. Intimas Surya	1	1	1	1	1	0123//BPKP-LHP-PU/GP.VI/XI/2019
31498	NURFI 1	Indonesia	PT. Intimas Surya	1	1	1	1	1	0106/BPKP-LHP-PU/GP.VI/XI/2019
31498	OSKAR	Indonesia	PT. Intimas Surya	1	1	1	1	1	0179//BPKP-LHP-PU/GP.VI/XI/2019
31498	RAFIKA 05	Indonesia	PT. Intimas Surya	1	1	1	1	1	0127//BPKP-LHP-PU/GP.VI/XI/2019
31498	RAHMA	Indonesia	PT. Intimas Surya	1	1	1	1	1	0169//BPKP-LHP-PU/GP.VI/XI/2019
31498	RAMA 243	Indonesia	PT. Intimas Surya	1	1	1	1	1	0137//BPKP-LHP-PU/GP.VI/XI/2019
31498	RIA 01	Indonesia	PT. Intimas Surya	1	1	1	1	1	0172//BPKP-LHP-PU/GP.VI/XI/2019
31498	RIA 02	Indonesia	PT. Intimas Surya	1	1	1	1	1	0167//BPKP-LHP-PU/GP.VI/XI/2019
31498	SALSA	Indonesia	PT. Intimas Surya	1	1	1	1	1	0171//BPKP-LHP-PU/GP.VI/XI/2019
31498	SEJATI	Indonesia	PT. Intimas Surya	1	1	1	1	1	0168//BPKP-LHP-PU/GP.VI/XI/2019
31498	SEJATI 1	Indonesia	PT. Intimas Surya	1	1	1	1	1	0160//BPKP-LHP-PU/GP.VI/XI/2019
31498	SEJATI 2	Indonesia	PT. Intimas Surya	1	1	1	1	1	0158//BPKP-LHP-PU/GP.VI/XI/2019
31498	SETIA 01	Indonesia	PT. Intimas Surya	1	1	1	1	1	0173//BPKP-LHP-PU/GP.VI/XI/2019
31498	SITI	Indonesia	PT. Intimas Surya	1	1	1	1	1	0107/BPKP-LHP-PU/GP.VI/XI/2019
31498	TALIA	Indonesia	PT. Intimas Surya	1	1	1	1	1	0099/BPKP-LHP-PU/GP.VI/XI/2019
31498	TELUK BANDA	Indonesia	PT. Intimas Surya	1	1	1	1	1	0146//BPKP-LHP-PU/GP.VI/XI/2019
31498	TIGA BINTANG	Indonesia	PT. Intimas Surya	1	1	1	1	1	0153//BPKP-LHP-PU/GP.VI/XI/2019
31498	VILONA JAYA	Indonesia	PT. Intimas Surya	1	1	1	1	1	0108//BPKP-LHP-PU/GP.VI/XI/2019
31498	WAER INDAH 1	Indonesia	PT. Intimas Surya	1	1	1	1	1	0163//BPKP-LHP-PU/GP.VI/XI/2019
31498	ZHARAN	Indonesia	PT. Intimas Surya	1	1	1	1	1	0144//BPKP-LHP-PU/GP.VI/XI/2019
31498	TIGA BERSAUDARA 01	Indonesia	PT. Intimas Surya	1	1	1	1	1	0174//BPKP-LHP-PU/GP.VI/XI/2019
31498	ADITYA 2	Indonesia	PT. Intimas Surya	1	1	1	1	1	0151//BPKP-LHP-PU/GP.VI/XI/2019
31498	TUNA PASIFIK 069	Indonesia	PT. Kelola Mina Samudra	1	1	1	1	1	45.20.8207.56.00052
31498	TUNA PASIFIK 027	Indonesia	PT. Kelola Mina Samudra	1	1	1	1	1	45.20.8207.56.00077
31498	TUNA PASIFIK 078	Indonesia	PT. Kelola Mina Samudra	1	1	1	1	1	45.20.8207.56.00061
31498	KULURI (JOHN)	Indonesia	PT. Harta Samudra	1	1	1	1	1	No.PK.205/5/17/UUP.DRB-2021
31498	TUNA PASIFIK 074	Indonesia	PT. Kelola Mina Samudra	1	1	1	1	1	45.20.8207.56.00057
31498	JAVIER	Indonesia	PT. Chen Woo Fishery	1	1	1	1	1	523/DISPERIK/BPKP/222/X-2019
31498	SINAR GORONTALO	Indonesia	PT. Chen Woo Fishery	1	1	1	1	1	35.21.7198.5223.00102
31498	TUNA BERKAH	Indonesia	PT. Chen Woo Fishery	1	1	1	1	1	523/DISPERIK/BPKP/90/V-2020
31498	GARETH STAR	Indonesia	PT. Chen Woo Fishery	1	1	1	1	1	523/DISPERIK/BPKP/170/VIII-2020
31498	AFLI 01	Indonesia	PT. Chen Woo Fishery	1	1	1	1	1	523/DISPERIK/BPKP/164/IX-2018
31498	AFLI 02	Indonesia	PT. Chen Woo Fishery	1	1	1	1	1	45.18.7198.169.00046
31498	ALBERKI 011	Indonesia	PT. Chen Woo Fishery	1	1	1	1	1	523/DISPERIK/BPKP/85/IV-2019
31498	ALDIN 01	Indonesia	PT. Nutrindo Fresfood Internasional	1	1	1	1	1	26.18.7198.169.00541
31498	ALDUS (BUN TUAN)	Indonesia	PT. Chen Woo Fishery	1	1	1	1	1	26.20.7198.5223.00454
31498	ALKATIK	Indonesia	PT. Sari Tuna Makmur	1	1	1	1	1	523/DISPERIK/BPKP/131/VII-2018
31498	ALTA DURI	Indonesia	PT. Nutrindo Fresfood Internasional	1	1	1	1	1	523/DISPERIK/BPKP/47/III/2021
[truncated: 1,693 more rows]
[truncated: 10 more columns]
